# Supplementary material for: Efficacy and safety of tirofiban in patients with acute branch atheromatous disease-related stroke (BRANT): a protocol for a randomised controlled trial
Source: PubMed Central journal article supplement — BMJ Open. 2024 Jun 10;14(6):e082141. doi: 10.1136/bmjopen-2023-082141 (PMC11168161; doi:10.1136/bmjopen-2023-082141), 2024-06-10
Supplement: bmjopen-2023-082141.draft_revisions.pdf [file bmjopen-2023-082141.draft_revisions.pdf]

# BMJ Open

BMJ Open is committed to open peer review. As part of this commitment we make the peer review history of every article we publish publicly available.

When an article is published we post the peer reviewers' comments and the authors' responses online. We also post the versions of the paper that were used during peer review. These are the versions that the peer review comments apply to.

The versions of the paper that follow are the versions that were submitted during the peer review process. They are not the versions of record or the final published versions. They should not be cited or distributed as the published version of this manuscript.

BMJ Open is an open access journal and the full, final, typeset and author-corrected version of record of the manuscript is available on our site with no access controls, subscription charges or pay-per-view fees (<http://bmjopen.bmj.com>).

If you have any questions on BMJ Open's open peer review process please email [info.bmjopen@bmj.com](mailto:info.bmjopen@bmj.com)

# BMJ Open

## **Efficacy and Safety of Tirofiban in Patients with Acute Branch Atherosclerotic Disease(BAD)-Related Stroke (BRANT): Protocol for a randomized controlled trial**

|                               |                                                                                                                                                                                                                                                                                                                                                                                                                                 |
|-------------------------------|---------------------------------------------------------------------------------------------------------------------------------------------------------------------------------------------------------------------------------------------------------------------------------------------------------------------------------------------------------------------------------------------------------------------------------|
| Journal:                      | <i>BMJ Open</i>                                                                                                                                                                                                                                                                                                                                                                                                                 |
| Manuscript ID                 | bmjopen-2023-082141                                                                                                                                                                                                                                                                                                                                                                                                             |
| Article Type:                 | Protocol                                                                                                                                                                                                                                                                                                                                                                                                                        |
| Date Submitted by the Author: | 15-Nov-2023                                                                                                                                                                                                                                                                                                                                                                                                                     |
| Complete List of Authors:     | Li, Shengde; Peking Union Medical College Hospital, dingding, zhang; peking union medical college hopspital Sha, Yuhui; Peking Union Medical College, Department of Neurology yicheng, zhu; Peking Union Medical College Hospital, Neurology Zhou, Lixin; Peking Union Medical College, Department of Neurology Peng, Bin; Peking Union Medical College Hospital Ni, Jun; Peking Union Medical College, Department of Neurology |
| Keywords:                     | Stroke < NEUROLOGY, Prognosis, THERAPEUTICS                                                                                                                                                                                                                                                                                                                                                                                     |
|                               |                                                                                                                                                                                                                                                                                                                                                                                                                                 |

SCHOLARONE™  
Manuscripts

1  
2  
3  
4 **Efficacy and Safety of Tirofiban in Patients with Acute Branch Atherosclerotic**  
5  
6 **Disease(BAD)-Related Stroke (BRANT): Protocol for a randomized controlled**  
7  
8  
9 **trial**  
10

11 **Authors:** Shengde Li, MD;<sup>1</sup> Dingding Zhang, PhD;<sup>2</sup> Yuhui Sha, MD;<sup>1</sup> Yicheng Zhu,  
12  
13  
14 MD;<sup>1</sup> Lixin Zhou, MD;<sup>1</sup> Bin Peng, MD;<sup>1</sup> Jun NI, MD.<sup>1</sup>  
15  
16

17  
18  
19 1 Department of Neurology, State Key Laboratory of Complex Severe and Rare  
20  
21 Diseases, Peking Union Medical College Hospital, Chinese Academy of Medical  
22  
23 Science and Peking Union Medical College, Beijing, China.  
24  
25

26  
27 2 Medical Research Center, State Key laboratory of Complex Severe and Rare Diseases,  
28  
29 Peking Union Medical College Hospital, Chinese Academy of Medical Sciences and  
30  
31 Peking Union Medical College, Beijing, China.  
32  
33

34  
35 **Corresponding author:**  
36

37 Jun Ni, MD  
38

39  
40 Department of Neurology, Peking Union Medical College Hospital, Beijing, China.  
41

42  
43 Department of Neurology, Peking Union Medical College Hospital, Shuaifuyuan1,  
44  
45 Dong Cheng District, Beijing, 100730, China  
46

47  
48 Phone: +86 10 69156371  
49

50  
51 Fax: +86 10 69156371  
52

53  
54 E-mail: pumchnijun@163.com  
55

56 **Total word count: 3720**  
57  
58  
59  
60

### Strengths and limitations of this study

1. Most published clinical studies classed BAD into small-vessel occlusion or undetermined etiology based on TOAST system. This study focuses on patients with acute BAD-related stroke, with the aid of magnetic resonance imaging.
2. Currently, there is no effective regimen to treat BAD-related stroke, and reduce disability. This study aims to addressing the current treatment dilemma in acute phase. Intervention will be prescribed within 48 hours after onset. 90-day modified Rankin Scale is set as primary outcome.
3. Lack of double blinded design is a limitation, but the endpoints are measured in a blind manner. An independent Clinical Event Committee is established to assess clinical events.

## Abstract

**Introduction:** Branch atheromatous disease (BAD)-related stroke is increasingly becoming a clinical entity and prone to early neurological deterioration (END) and poor prognosis. There are no effective regimen in acute phase to reduce the disability caused by BAD-related stroke. Recent studies have indicated the efficacy of tirofiban in acute ischemic stroke, but have not been validated in patients with BAD-related stroke. Thus, we aim to test whether intravenous tirofiban initiated within 48 hours after onset would safely improve the functional outcome in patients with acute BAD-related stroke, in comparison with standard antiplatelet therapy based on guideline.

**Methods and analysis:** BRANT is a multicenter, randomized, open-label, blinded endpoint, parallel controlled phase III trial in China. Participants with acute BAD-related stroke are randomized 1:1 to tirofiban or control group. The primary outcome is the excellent functional outcome (modified Rankin Scale score: 0-1) at 90 days. Secondary outcomes include END, major bleeding, stroke, death, functional status, serious adverse events, and change in bleeding-related markers. A total of 516 participants assuming the rates of primary outcome to be 74% in the tirofiban group and 62% in the control group are needed for 0.8 power (two-sided 0.05 alpha).

**Discussion:** BRANT aims to provide direct evidence on the efficacy and safety of early intravenous tirofiban in acute BAD-related stroke, thus addressing the current treatment dilemma for improving functional outcome.

**Ethics and dissemination:** BRANT study has been approved by the Ethics Committee of Peking Union Medical College Hospital. Written informed consent is required for

1  
2  
3  
4 all patients before enrollment. Results of the study will be published in a peer-reviewed  
5  
6 journal.  
7  
8  
9

10  
11 **Keywords:** Branch Atheromatous Disease, Acute ischemic stroke, Early neurological  
12  
13 deterioration, Functional outcome, Tirofiban, Treatment  
14  
15  
16  
17  
18  
19  
20  
21  
22  
23  
24  
25  
26  
27  
28  
29  
30  
31  
32  
33  
34  
35  
36  
37  
38  
39  
40  
41  
42  
43  
44  
45  
46  
47  
48  
49  
50  
51  
52  
53  
54  
55  
56  
57  
58  
59  
60

For peer review only

## Introduction

Branch atheromatous disease (BAD), first described by Caplan in 1989 as a concept, is becoming a clinical entity with the aid of advanced neuroimaging.<sup>1-3</sup> BAD-related stroke, characterized by subcortical single infarcts without severe stenosis of large artery, accounts for 20.4% of all ischemic stroke cases in Asian population.<sup>2</sup> Different from lacunar infarct due to lipohyalinosis, BAD-related stroke is caused by parent arterial plaque occlusion of the perforating orifice or proximal atherosclerotic occlusion of the perforating artery.<sup>1-3</sup>

High incidence of early neurological deterioration (END) was observed in BAD-related stroke, and was strongly associated with poor prognosis.<sup>4 5</sup> The rate of END is higher in BAD-related stroke than that in lacunar infarct (26.8-37.5% vs. 6.3-18.6%), and thrombolysis itself cannot prevent the occurrence of END.<sup>4-6</sup> In addition, it remains unclear whether the intravenous thrombolysis could improve the clinical outcome in BAD-related stroke.<sup>7</sup> Its rate of disability could reach 61%.<sup>2</sup> However, there are no high-level recommendations for acute-phase treatment of BAD-related stroke, and no RCT has examined BAD as a separate disease. Current practice-based on limited observational data and expert opinion-is heterogeneous, including anticoagulants and dual antiplatelet therapy, whose efficacy is uncertain for BAD-related stroke.<sup>8 9</sup>

Historical evidence suggests that intravenous tirofiban, a selective and reversible antagonist of GP IIb/IIIa inhibitors on platelet, increases recanalization rate and improves functional prognosis in stroke patients with endovascular therapy, without increased bleeding risk<sup>10-12</sup>. A large randomized trial of stroke without large or

1  
2  
3  
4 medium-sized vessel occlusion also reported the efficacy of tirofiban<sup>13</sup>. Though  
5  
6 atherosclerotic mechanism is presumed between BAD and large artery atherosclerosis,  
7  
8 this evidence may not generalize to BAD-related stroke, for selection bias, retrospective  
9  
10 data or small sample.<sup>10 14</sup> Another limitation is that tirofiban was often prescribed after  
11  
12 END, which might cause irreversible ischemic lesion and neurologic deficit.<sup>10 13</sup>  
13  
14 Randomized controlled trials of acute BAD-related stroke are therefore needed, and  
15  
16 have been called for by researchers.<sup>3 15</sup>  
17  
18 The BTANT trial aims to establish the efficacy and safety of intravenous tirofiban in  
19  
20 improving functional outcome in patients with acute BAD-related stroke.  
21  
22  
23  
24  
25  
26  
27  
28  
29

## 30 **Methods**

### 31 **Design**

32  
33 This is a multicenter, randomized, open label, blinded endpoint, parallel controlled  
34  
35 phase III trial. BRANT study has started enrollment on November 9, 2023, and the  
36  
37 anticipated date of study completion is October 31, 2025. This protocol has been  
38  
39 registered at ClinicalTrials.gov (NCT06037889).  
40  
41  
42  
43  
44

### 45 **Patient population**

46  
47 BRANT will enroll 516 participants with BAD-related stroke within 48 hours of onset,  
48  
49 from 21 centers in China.  
50  
51

### 52 **Inclusion criteria**

- 53 ● Age: 18-75 years old
  - 54 ● Acute ischemic stroke
- 55  
56  
57  
58  
59  
60



- Time from onset to randomization  $\leq 48\text{h}$ ; if onset time is unknown, time from last known well to randomization  $\leq 48\text{h}$

- Meet the following BAD Diagnostic Imaging Criteria

1. DWI infarcts: single (isolated) deep (subcortical) infarcts;

2. The culprit arteries are either Lenticulostriate artery (LSA) or Paramedian pontine artery (PPA), and the infarct lesion on DWI conforms to one of the following characteristics (A/B):

- A. LSA: “Comma-like” infarct lesions with “Fan-shaped” extension from bottom to top in the coronary position; or  $\geq 3$  layers (layer thickness 5– 7 mm) on axial DWI brain images;

- B. PPA: The infarct lesion extends from the deep pons to the ventral pons on the axial DWI brain images;

- No more than 50% stenosis on the parent artery of the criminal artery (i.e. corresponding basilar or middle cerebral artery) (Confirmed by MRA/CTA/DSA)
- Signed informed consent by the patient or legally authorized representatives.

#### **Exclusion criteria**

- Transient ischemic attack (TIA)
- Intracranial hemorrhagic diseases, vascular malformations, aneurysms, brain abscesses, malignant space-occupying lesions, or other non- ischemic intracranial lesions detected by baseline CT/MRI, or MRA/CTA/ DSA

- Presence of  $\geq 50\%$  stenosis in extracranial artery in tandem relationship ipsilateral to the lesion
- Cardiogenic embolism: atrial fibrillation, myocardial infarction, heart valve disease, dilated cardiomyopathy, infective endocarditis, atrioventricular block disease, heart rate less than 50 beats per minute
- Have received or plan to receive endovascular therapy or thrombolysis after onset
- Stroke of other clear causes, e.g., moyamoya disease, arterial entrapment, vasculitis, etc.
- modified Rankin Scale  $\geq 2$  before onset
- Use of tirofiban within 1 week before or after onset
- Low platelets ( $<100 \times 10^9/L$ ), or prothrombin time  $>1.3$  times of the upper normal limit, or INR  $>1.5$ , or other systemic hemorrhagic tendencies such as hematologic disorders
- Elevation of ALT or AST more than 1.5 times the upper normal limit
- Glomerular filtration rate  $<60$  ml/min/1.73m<sup>2</sup>
- Known malignant tumors
- History of trauma or major surgical intervention within 6 weeks prior to onset
- History of intracranial hemorrhage
- Active or recent history (within 30 days prior to onset) of clinical bleeding (e.g., gastrointestinal bleeding)

- Malignant hypertension (systolic blood pressure >200 mmHg, or diastolic blood pressure >120 mmHg)
- Life expectancy  $\leq$  6 months
- Contraindications of 3 T MRI examination
- Pregnant or lactating women
- Have participated in another clinical trial within 3 months prior to the date of informed consent, or are participating in another clinical trial

### **Randomization**

Participants will be randomized at a ratio of 1:1 using a dynamic block randomization method via an independent central website. Block sizes were set to 6, 8, and 12. The allocation sequence was stored in the central website and the participant was issued to intervention or control group by 1:1 ratio according to the order of enrollment time.

### **Intervention**

Tirofiban group: Intravenous tirofiban will be administered immediately after randomization for a total duration of 48 hours with a loading dose of 0.4ug/kg/min\*30min, followed by a maintenance dose of 0.1ug/kg/min\*47.5h (Figure 1).

Control group: Standard antiplatelet therapy based on Chinese stroke guideline will be initiated after randomization for a total duration of 48 hours, as the two following types:

1) aspirin 150-300 mg qd, or 2) aspirin 100 mg qd plus clopidogrel 75 mg qd<sup>16</sup>. Its

1  
2  
3  
4 initiation will be determined based on the last administration time of antithrombotic  
5  
6 drugs, but the drug should be given as soon as possible.  
7  
8  
9

### 10 11 **Primary outcomes**

12  
13  
14 The primary outcome is excellent functional outcome at 90 days, defined as modified  
15  
16 Rankin Scale score: 0-1. Primary outcome will be measured by the qualified evaluators,  
17  
18 who are blinded to all procedures.  
19  
20  
21  
22  
23

### 24 25 **Secondary outcomes**

26  
27 Secondary efficacy outcomes include END, National Institutes of Health Stroke Scale  
28  
29 (NIHSS) score, Barthel index score, ischemic stroke, stroke, TIA, and a composite  
30  
31 event of new-onset stroke, myocardial infarction, and all-cause death. The safety  
32  
33 outcomes include the proportion of major bleeding defined by the PLATO criteria,  
34  
35 adverse events, all-cause death, and changes in bleeding-related markers<sup>17</sup>. Evaluators  
36  
37 after randomization are not aware of treatment assignment. All the clinical and safety  
38  
39 events will be re-examined by the independent Clinical Event Committee (CEC), who  
40  
41 are blinded during all procedures.  
42  
43  
44  
45  
46  
47

48 The presence of END is determined by an increase of  $\geq 4$  points in the NIHSS or an  
49  
50 increase of  $\geq 2$  points in the NIHSS motor score. In addition, NIHSS motor score refers  
51  
52 to bilateral upper and lower extremity mobility scores. The baseline NIHSS score for  
53  
54 the calculation of END is the first clinician-evaluated and recorded NIHSS score after  
55  
56 onset. The time frame for post-randomization END is within 7 days of randomization.  
57  
58  
59  
60

## Study protocol and data management

A study flow is shown in Figure 1 and Table S1. At visit 1, trained investigators will recruit the patient by screening age, onset time, magnetic resonance imaging, and other enrollment criteria (ie, intracranial artery, and electrocardiogram). Then, the investigator will explain the BRANT study in details, including contents of each visits and interventions to patients. After obtaining written informed consent, participants will be assigned to tirofiban or control group via a central website-based randomization system. Patients are encouraged to undergo on-site follow-up at 90 days. Demographic, clinical, radiological, laboratory and clinical event data at each visit (Table S1) will be collected and stored in electronic case report form via a website (<http://117.78.2.36:5010/>). All CRFs will be checked by local investigators for completeness and correction before data entry. Data will be checked dynamically by investigator (Jun Ni), with the aid of research assistants.

## Data Monitoring Board

An independent Data Security Monitoring Board (DSMB), including academic experts and statisticians, has been established to protect the interests of the participants during the study. The DSMB needs to review the overall implementation of the clinical study, and assess the risks and benefits regularly and dynamically, especially unexpected adverse event. DSMB reports to the Executive Committee and provides professional advice.

### Sample size estimates

Based on previous studies and clinical practice, we assumed the rates of primary outcome to be 62% and 74% in the control group and tirofiban group, respectively.<sup>2</sup>  
10-12 14 18-20 Thus, 234 per arm is needed for a two-sided test at alpha 0.05 and power 0.8. Considering a 10% dropout rate, 516 patients will be required.

### Statistical analyses

According to the principle of intention-to-treat analysis, all subjects randomized into the groups with more than one efficacy evaluation will be included in the full analysis set. The estimation of missing values will be conducted by the carry-over based on last observation carried forward (LOCF) estimation method. The proportion of excellent outcome at 90 days will be compared using the chi-square tests, and shown as frequency (percentage). Most secondary outcome analyses will also use the primary outcome analysis strategy. Survival data will be calculated by Kaplan-Meier method to estimate its survival rate in each group and the efficacy are assessed by Log-rank test. Hazard ratio and 95% CI will be calculated by cox proportional hazards model. Non-survival data will be calculated by chi-square test and odds ratios and 95%CI also will be calculated. Continuous variables will be compared by Student t -test or Wilcoxon rank sum test between the two groups. The influence of covariables will be evaluated via the subgroup analyses. All analysis will be performed using SAS 9.4 and a two-sided P < 0.05 is considered significant.

## Patient and public involvement statement

None.

**Ethics and dissemination:** BRANT study has been approved by the Ethics Committee of Peking Union Medical College Hospital on July 20, 2023. Written informed consent is required for all patients before enrollment. BRANT is carried out according to Good Clinical Practice and the Declaration of Helsinki. Protocol amendments will be reported to the institutional ethics committee. The trial sponsor is Peking Union Medical College Hospital. Trial results will be published in a peer-reviewed journal.

## Discussion

The BRANT trial is a multicenter RCT, addressing the important treatment dilemma that how to improve the functional outcome of BAD-related stroke.

BAD was first described by Caplan in 1989, when BAD was just a concept, distinct from lacuna infarct.<sup>1</sup> However, in past three decades, most clinical studies classed BAD into small-vessel occlusion or undetermined etiology based on TOAST system.<sup>15 21</sup> Few studies focused on acute BAD-related stroke, probably due to discrepant definitions.<sup>3</sup> Recently, increasing observational studies found distinct clinical, radiologic, and prognostic features that BAD-related stroke were prone to END and poor prognosis.<sup>2</sup>

22

Due to the limitation of neuroimaging technique, there were no direct visualization of perforating artery, such as LSA and PPA. Radiological diagnosis was based on vascular

territory, dimension, or shape of the lesion,<sup>3 23</sup> which resulted in a huge variation among BAD definitions. With the aid of neuroimaging and clinical practice, Asian neurologists proposed radiological diagnosis criteria for BAD.<sup>24 25</sup> Our previous study also found that  $\geq 4$  consecutive slices on axial view was more effective than transversal diameter to differentiate atherosclerotic mechanisms of single subcortical infarction in LSA territory.<sup>26</sup> Considering generalization and diagnostic accuracy of our study, we used  $\geq 3$  consecutive layers on axial DWI series instead of lesion diameter to define BAD-related stroke in LSA territory.<sup>27</sup> As direct evidence of LSA and PPA are not technically feasible at present, our inclusion criteria based on MRI shows considerable accuracy and representativeness.

About 78.6%-90.9% of END occurred within 48 hours after onset.<sup>28 29</sup> Our preliminary results of BAD-related stroke cohort found that the median hours from onset to END was 38<sup>30</sup>. We hypothesize that early tirofiban could improve functional prognosis via preventing the occurrence of END. Thus, tirofiban should be initiated within 48 hours after onset. Considering the predictive value of END, we adopted the widely used and conservative definition of END in BRANT study.<sup>31</sup> The effect of tirofiban on reducing END risk is a key secondary outcome.

We set 90-day excellent outcome instead of END or new-onset stroke as the primary outcome for: 1) historical evidence indicated that tirofiban improved the functional outcome of ischemic stroke;<sup>10 13</sup> 2) END is an intermediate indicators;<sup>4</sup> 3) 90-day rate of recurrent stroke is 1.8% in our preliminary analysis of BAD-related stroke cohort, and probably less than 3.8% in other cohorts,<sup>22</sup> which is relatively low. Thus, BRANT



1  
2  
3  
4 study would provide direct evidence on how to reduce disability caused by BAD, which  
5  
6 is the major challenge in current clinical practice.  
7

8  
9 As oral mono antiplatelet therapy is unethical and against Chinese stroke guidelines for  
10  
11 patients with NIHSS  $\leq 3$ , there are two types of antiplatelet therapy in control group.<sup>16</sup>  
12  
13 Double-blind design would markedly increase the complexity of the trial procedure.  
14  
15 Therefore, we selected PROBE design for BRANT. We trained independent senior  
16  
17 neurologists for the evaluation of primary outcome blinded to the procedure  
18  
19 information. Independent CEC was established to centrally re-examine all clinical  
20  
21 events after randomization. Some local investigators may know the treatment allocation,  
22  
23 but all evaluators of subjective indicators are blinded to treatment allocation.  
24  
25  
26  
27  
28  
29  
30  
31

## 32 **Conclusions**

33  
34 BRANT is designed to test the efficacy and safety of early intravenous tirofiban in  
35  
36 patients with acute BAD-related stroke, aiming at effectively improving the functional  
37  
38 outcome.  
39  
40  
41  
42  
43  
44

45 **Contributors:** Shengde Li, and Jun Ni designed the study. Shengde Li drafted the  
46  
47 manuscript. Dingding Zhang designed the statistical method. Yuhui Sha, Lixin Zhou,  
48  
49 Yicheng Zhu, and Bin Peng critically revised the study protocol and the manuscript.  
50  
51 The entire project will be supervised by Jun Ni.  
52  
53

54  
55 **Funding:** This study is funded by the National High Level Hospital Clinical Research  
56  
57 Funding (2022-PUMCH-D-007).  
58  
59  
60

1  
2  
3  
4 **Disclaimer:** The funder has no role in this study.  
5

6 **Competing interests:** None declared.  
7  
8  
9  
10  
11  
12  
13  
14  
15  
16  
17  
18  
19  
20  
21  
22  
23  
24  
25  
26  
27  
28  
29  
30  
31  
32  
33  
34  
35  
36  
37  
38  
39  
40  
41  
42  
43  
44  
45  
46  
47  
48  
49  
50  
51  
52  
53  
54  
55  
56  
57  
58  
59  
60

For peer review only

**References:**

1. Caplan LR. Intracranial branch atheromatous disease: a neglected, understudied, and underused concept. *Neurology* 1989;39(9):1246-50.
2. Kwan MW, Mak W, Cheung RT, et al. Ischemic stroke related to intracranial branch atheromatous disease and comparison with large and small artery diseases. *Journal of the neurological sciences* 2011;303(1-2):80-4.
3. Petrone L, Nannoni S, Del Bene A, et al. Branch Atheromatous Disease: A Clinically Meaningful, Yet Unproven Concept. *Cerebrovascular diseases (Basel, Switzerland)* 2016;41(1-2):87-95.
4. Duan Z, Fu C, Chen B, et al. Lesion patterns of single small subcortical infarct and its association with early neurological deterioration. *Neurological sciences : official journal of the Italian Neurological Society and of the Italian Society of Clinical Neurophysiology* 2015;36(10):1851-7.
5. Jeong HG, Kim BJ, Yang MH, et al. Neuroimaging markers for early neurologic deterioration in single small subcortical infarction. *Stroke* 2015;46(3):687-91.
6. Park MG, Oh EH, Kim BK, et al. Intravenous tissue plasminogen activator in acute branch atheromatous disease: Does it prevent early neurological deterioration? *Journal of clinical neuroscience : official journal of the Neurosurgical Society of Australasia* 2016;33:194-97.
7. Wu X, Liu Y, Nie C, et al. Efficacy and Safety of Intravenous Thrombolysis on Acute Branch Atheromatous Disease: A Retrospective Case-Control Study. *Frontiers in neurology* 2020;11:581.

- 1  
2  
3  
4 8. Wang Q, Chen C, Chen XY, et al. Low-molecular-weight heparin and early  
5  
6 neurologic deterioration in acute stroke caused by large artery occlusive disease.  
7  
8  
9 *Archives of neurology* 2012;69(11):1454-60.  
10  
11  
12 9. Yi X, Zhou Q, Wang C, et al. Aspirin plus clopidogrel may reduce the risk of early  
13  
14 neurologic deterioration in ischemic stroke patients carrying CYP2C19\*2  
15  
16 reduced-function alleles. *Journal of neurology* 2018;265(10):2396-403.  
17  
18  
19 10. Wu C, Sun C, Wang L, et al. Low-Dose Tirofiban Treatment Improves Neurological  
20  
21 Deterioration Outcome After Intravenous Thrombolysis. *Stroke*  
22  
23 2019;50(12):3481-87.  
24  
25  
26 11. Pan X, Zheng D, Zheng Y, et al. Safety and efficacy of tirofiban combined with  
27  
28 endovascular treatment in acute ischaemic stroke. *European journal of*  
29  
30 *neurology* 2019;26(8):1105-10.  
31  
32  
33  
34 12. Yang J, Wu Y, Gao X, et al. Intraarterial Versus Intravenous Tirofiban as an  
35  
36 Adjunct to Endovascular Thrombectomy for Acute Ischemic Stroke. *Stroke*  
37  
38 2020;51(10):2925-33.  
39  
40  
41  
42 13. Zi W, Song J, Kong W, et al. Tirofiban for Stroke without Large or Medium-Sized  
43  
44 Vessel Occlusion. *The New England journal of medicine* 2023;388(22):2025-  
45  
46 36.  
47  
48  
49  
50 14. Liu B, Zhang H, Wang R, et al. Early administration of tirofiban after urokinase-  
51  
52 mediated intravenous thrombolysis reduces early neurological deterioration in  
53  
54 patients with branch atheromatous disease. *The Journal of international*  
55  
56 *medical research* 2020;48(5):300060520926298.  
57  
58  
59  
60

- 1  
2  
3  
4 15. Kim BJ, Kim JS. Ischemic stroke subtype classification: an asian viewpoint.  
5  
6 *Journal of stroke* 2014;16(1):8-17.  
7  
8  
9 16. Chinese Society of Neurology, Cerebrovascular disease group of Chinese Society  
10  
11 of Neurology. Chinese guidelines for diagnosis and treatment of acute ischemic  
12  
13 stroke 2018. *Chin J Neurol.* 2018;51 9:666-682  
14  
15  
16  
17 17. Wallentin L, Becker RC, Budaj A, et al. Ticagrelor versus clopidogrel in patients  
18  
19 with acute coronary syndromes. *The New England journal of medicine*  
20  
21 2009;361(11):1045-57.  
22  
23  
24  
25 18. Wang H, Li X, Liu C, et al. Effects of Oral Antiplatelet Agents and Tirofiban on  
26  
27 Functional Outcomes of Patients with Non-Disabling Minor Acute Ischemic  
28  
29 Stroke. *Journal of stroke and cerebrovascular diseases : the official journal of*  
30  
31 *National Stroke Association* 2020;29(8):104829.  
32  
33  
34  
35 19. Lin J, Han Z, Wang C, et al. Dual therapy with clopidogrel and aspirin prevents  
36  
37 early neurological deterioration in ischemic stroke patients carrying  
38  
39 CYP2C19\*2 reduced-function alleles. *Eur J Clin Pharmacol* 2018;74(9):1131-  
40  
41  
42  
43 40.  
44  
45  
46 20. Albers GW, Marks MP, Kemp S, et al. Thrombectomy for Stroke at 6 to 16 Hours  
47  
48 with Selection by Perfusion Imaging. *The New England journal of medicine*  
49  
50 2018;378(8):708-18.  
51  
52  
53 21. Uchiyama S, Toyoda K, Kitagawa K, et al. Branch atheromatous disease diagnosed  
54  
55 as embolic stroke of undetermined source: A sub-analysis of NAVIGATE  
56  
57 ESUS. *International journal of stroke : official journal of the International*  
58  
59  
60

- 1  
2  
3  
4 *Stroke Society* 2019;14(9):915-22.  
5  
6  
7 22. Zhang C, Wang Y, Zhao X, et al. Distal single subcortical infarction had a better  
8  
9 clinical outcome compared with proximal single subcortical infarction. *Stroke*  
10  
11 2014;45(9):2613-9.  
12  
13  
14 23. Yamamoto Y, Ohara T, Hamanaka M, et al. Characteristics of intracranial branch  
15  
16 atheromatous disease and its association with progressive motor deficits.  
17  
18 *Journal of the neurological sciences* 2011;304(1-2):78-82.  
19  
20  
21  
22 24. Adachi T, Takagi M. The clinical differences between lacunar infarction and branch  
23  
24 atheromatous disease. *Nihon rinsho Japanese journal of clinical medicine*  
25  
26 2006;64 Suppl 8:155-9.  
27  
28  
29  
30 25. Zhou LX, Ni J. Advances in Branch Atheromatous Disease. *Chinese Stroke Journal*  
31  
32 2020;15:1342- 1351.  
33  
34  
35 26. Cao Y, Zhang M, Zhou L, et al. Consecutive Slides on Axial View Is More Effective  
36  
37 Than Transversal Diameter to Differentiate Mechanisms of Single Subcortical  
38  
39 Infarctions in the Lenticulostriate Artery Territory. *Frontiers in neurology*  
40  
41 2019;10:336.  
42  
43  
44  
45 27. Investigators SPS, Benavente OR, Hart RG, et al. Effects of clopidogrel added to  
46  
47 aspirin in patients with recent lacunar stroke. *The New England journal of*  
48  
49 *medicine* 2012;367(9):817-25.  
50  
51  
52  
53 28. Audebert HJ, Pellkofer TS, Wimmer ML, et al. Progression in lacunar stroke is  
54  
55 related to elevated acute phase parameters. *European neurology*  
56  
57 2004;51(3):125-31.  
58  
59  
60

- 1  
2  
3  
4 29. Kim YS, Lee KY, Koh SH, et al. The role of matrix metalloproteinase 9 in early  
5  
6 neurological worsening of acute lacunar infarction. *European neurology*  
7  
8  
9 2006;55(1):11-5.  
10  
11  
12 30. Li S, Ni J, Fan X, et al. Study protocol of Branch Atheromatous Disease-related  
13  
14 stroke (BAD-study): a multicenter prospective cohort study. *BMC neurology*  
15  
16  
17 2022;22(1):458.  
18  
19  
20 31. Seners P, Turc G, Oppenheim C, et al. Incidence, causes and predictors of  
21  
22 neurological deterioration occurring within 24 h following acute ischaemic  
23  
24 stroke: a systematic review with pathophysiological implications. *Journal of*  
25  
26  
27 *neurology, neurosurgery, and psychiatry* 2015;86(1):87-94.  
28  
29  
30  
31  
32  
33  
34  
35  
36  
37  
38  
39  
40  
41  
42  
43  
44  
45  
46  
47  
48  
49  
50  
51  
52  
53  
54  
55  
56  
57  
58  
59  
60

**Figure I. Study Flow**

For peer review only

1  
2  
3  
4  
5  
6  
7  
8  
9  
10  
11  
12  
13  
14  
15  
16  
17  
18  
19  
20  
21  
22  
23  
24  
25  
26  
27  
28  
29  
30  
31  
32  
33  
34  
35  
36  
37  
38  
39  
40  
41  
42  
43  
44  
45  
46  
47  
48  
49  
50  
51  
52  
53  
54  
55  
56  
57  
58  
59  
60



1  
2  
3  
4  
5  
6  
7  
8  
9  
10  
11  
12  
13  
14  
15  
16  
17  
18  
19  
20  
21  
22  
23  
24  
25  
26  
27  
28  
29  
30  
31  
32  
33  
34  
35  
36  
37  
38  
39  
40  
41  
42  
43  
44  
45  
46  
47  
48  
49  
50  
51  
52  
53  
54  
55  
56  
57  
58  
59  
60

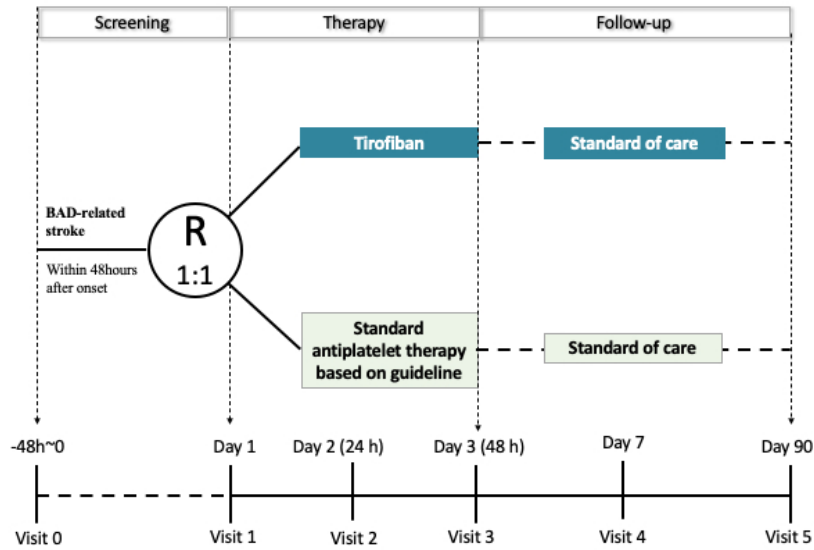

Figure 1. Study Flow

338x190mm (54 x 54 DPI)

## Supplementary materials

Table S1. Study Procedure of STRATEGY trial

| Measurement                                  | Day 1 | Day 2 | Day 3 | Day 7 | Day 90 |
|----------------------------------------------|-------|-------|-------|-------|--------|
| Demographic characteristics                  | X     |       |       |       |        |
| Current medical history taking               | X     |       |       |       |        |
| Body temperature measurement                 | X     |       |       |       |        |
| Physical examination                         | X     |       |       | X     | X      |
| Past medical history                         | X     |       |       |       |        |
| Pre-randomization medication after onset     | X     |       |       |       |        |
| Regular blood pressure monitoring            | X     | X     |       |       |        |
| NIHSS score                                  | X     |       |       | X     | X      |
| mRS score                                    | X     |       |       | X     | X      |
| Barthel index score                          | X     |       |       |       | X      |
| Magnetic resonance image                     | X     |       |       |       |        |
| Evaluation of Intracranial vessels           | X     |       |       |       |        |
| Evaluation of extracranial vessels           | X     |       |       |       |        |
| Laboratory tests*                            | X     |       |       |       |        |
| ECG*                                         | X     |       |       | X     |        |
| Verification of inclusion/exclusion criteria | X     |       |       |       |        |
| Signed informed consent                      | X     |       |       |       |        |
| Randomization                                | X     |       |       |       |        |
| Blood tests after enrollment                 |       | X     | X     |       |        |

|                                                                                                                                          |  |  |          |          |          |
|------------------------------------------------------------------------------------------------------------------------------------------|--|--|----------|----------|----------|
| Urine and fecal examination                                                                                                              |  |  | <b>X</b> |          |          |
| Compliance                                                                                                                               |  |  | <b>X</b> |          |          |
| Concomitant medication                                                                                                                   |  |  |          | <b>X</b> | <b>X</b> |
| Early neurological deterioration                                                                                                         |  |  |          | <b>X</b> |          |
| Major bleeding                                                                                                                           |  |  |          | <b>X</b> | <b>X</b> |
| Adverse Events/ Serious Adverse Events                                                                                                   |  |  |          | <b>X</b> | <b>X</b> |
| *Remarks: ECG and laboratory data performed within 48 hours of onset before signing the informed consent form can be used as trial data. |  |  |          |          |          |

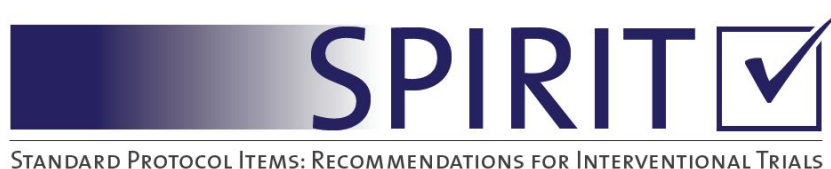

STANDARD PROTOCOL ITEMS: RECOMMENDATIONS FOR INTERVENTIONAL TRIALS

SPIRIT 2013 Checklist: Recommended items to address in a clinical trial protocol and related documents\*

| Section/item                      | Item No | Description                                                                                                                                                                                                                                                                              | Page                |
|-----------------------------------|---------|------------------------------------------------------------------------------------------------------------------------------------------------------------------------------------------------------------------------------------------------------------------------------------------|---------------------|
| <b>Administrative information</b> |         |                                                                                                                                                                                                                                                                                          |                     |
| Title                             | 1       | Descriptive title identifying the study design, population, interventions, and, if applicable, trial acronym                                                                                                                                                                             | 1                   |
| Trial registration                | 2a      | Trial identifier and registry name. If not yet registered, name of intended registry                                                                                                                                                                                                     | 2                   |
|                                   | 2b      | All items from the World Health Organization Trial Registration Data Set                                                                                                                                                                                                                 | Clinical Trials.gov |
| Protocol version                  | 3       | Date and version identifier                                                                                                                                                                                                                                                              | 12                  |
| Funding                           | 4       | Sources and types of financial, material, and other support                                                                                                                                                                                                                              | 12                  |
| Roles and responsibilities        | 5a      | Names, affiliations, and roles of protocol contributors                                                                                                                                                                                                                                  | 15                  |
|                                   | 5b      | Name and contact information for the trial sponsor                                                                                                                                                                                                                                       | Clinical Trials.gov |
|                                   | 5c      | Role of study sponsor and funders, if any, in study design; collection, management, analysis, and interpretation of data; writing of the report; and the decision to submit the report for publication, including whether they will have ultimate authority over any of these activities | 15                  |
|                                   | 5d      | Composition, roles, and responsibilities of the coordinating centre, steering committee, endpoint adjudication committee, data management team, and other individuals or groups overseeing the trial, if applicable (see Item 21a for data monitoring committee)                         | 10-11               |
| <b>Introduction</b>               |         |                                                                                                                                                                                                                                                                                          |                     |
| Background and rationale          | 6a      | Description of research question and justification for undertaking the trial, including summary of relevant studies (published and unpublished) examining benefits and harms for each intervention                                                                                       | 5-6                 |
|                                   | 6b      | Explanation for choice of comparators                                                                                                                                                                                                                                                    | 5                   |

|    |                                                           |     |                                                                         |           |
|----|-----------------------------------------------------------|-----|-------------------------------------------------------------------------|-----------|
| 1  |                                                           |     |                                                                         |           |
| 2  | Objectives                                                | 7   | Specific objectives or hypotheses                                       | 6         |
| 3  |                                                           |     |                                                                         |           |
| 4  | Trial design                                              | 8   | Description of trial design including type of trial (eg, parallel       | 6         |
| 5  |                                                           |     | group, crossover, factorial, single group), allocation ratio, and       |           |
| 6  |                                                           |     | framework (eg, superiority, equivalence, noninferiority,                |           |
| 7  |                                                           |     | exploratory)                                                            |           |
| 8  |                                                           |     |                                                                         |           |
| 9  |                                                           |     |                                                                         |           |
| 10 | <b>Methods: Participants, interventions, and outcomes</b> |     |                                                                         |           |
| 11 |                                                           |     |                                                                         |           |
| 12 | Study setting                                             | 9   | Description of study settings (eg, community clinic, academic           | 6         |
| 13 |                                                           |     | hospital) and list of countries where data will be collected.           |           |
| 14 |                                                           |     | Reference to where list of study sites can be obtained                  |           |
| 15 |                                                           |     |                                                                         |           |
| 16 | Eligibility                                               | 10  | Inclusion and exclusion criteria for participants. If applicable,       | 6-9       |
| 17 | criteria                                                  |     | eligibility criteria for study centres and individuals who will perform |           |
| 18 |                                                           |     | the interventions (eg, surgeons, psychotherapists)                      |           |
| 19 |                                                           |     |                                                                         |           |
| 20 |                                                           |     |                                                                         |           |
| 21 | Interventions                                             | 11a | Interventions for each group with sufficient detail to allow            | 9         |
| 22 |                                                           |     | replication, including how and when they will be administered           |           |
| 23 |                                                           |     |                                                                         |           |
| 24 |                                                           | 11b | Criteria for discontinuing or modifying allocated interventions for a   | In        |
| 25 |                                                           |     | given trial participant (eg, drug dose change in response to            | Protocol, |
| 26 |                                                           |     | harms, participant request, or improving/worsening disease)             | not       |
| 27 |                                                           |     |                                                                         | shown in  |
| 28 |                                                           |     |                                                                         | article   |
| 29 |                                                           |     |                                                                         |           |
| 30 |                                                           |     |                                                                         |           |
| 31 |                                                           | 11c | Strategies to improve adherence to intervention protocols, and          | In        |
| 32 |                                                           |     | any procedures for monitoring adherence (eg, drug tablet return,        | Protocol, |
| 33 |                                                           |     | laboratory tests)                                                       | not       |
| 34 |                                                           |     |                                                                         | shown in  |
| 35 |                                                           |     |                                                                         | article   |
| 36 |                                                           |     |                                                                         |           |
| 37 |                                                           |     |                                                                         |           |
| 38 |                                                           | 11d | Relevant concomitant care and interventions that are permitted or       | In        |
| 39 |                                                           |     | prohibited during the trial                                             | Protocol, |
| 40 |                                                           |     |                                                                         | not       |
| 41 |                                                           |     |                                                                         | shown in  |
| 42 |                                                           |     |                                                                         | article   |
| 43 |                                                           |     |                                                                         |           |
| 44 |                                                           |     |                                                                         |           |
| 45 | Outcomes                                                  | 12  | Primary, secondary, and other outcomes, including the specific          | 10        |
| 46 |                                                           |     | measurement variable (eg, systolic blood pressure), analysis            |           |
| 47 |                                                           |     | metric (eg, change from baseline, final value, time to event),          |           |
| 48 |                                                           |     | method of aggregation (eg, median, proportion), and time point          |           |
| 49 |                                                           |     | for each outcome. Explanation of the clinical relevance of chosen       |           |
| 50 |                                                           |     | efficacy and harm outcomes is strongly recommended                      |           |
| 51 |                                                           |     |                                                                         |           |
| 52 |                                                           |     |                                                                         |           |
| 53 | Participant                                               | 13  | Time schedule of enrolment, interventions (including any run-ins        | Figure    |
| 54 | timeline                                                  |     | and washouts), assessments, and visits for participants. A              | 1         |
| 55 |                                                           |     | schematic diagram is highly recommended (see Figure)                    |           |
| 56 |                                                           |     |                                                                         |           |
| 57 |                                                           |     |                                                                         |           |
| 58 |                                                           |     |                                                                         |           |
| 59 |                                                           |     |                                                                         |           |
| 60 |                                                           |     |                                                                         |           |

|    |             |    |                                                                                                                                                                                       |           |
|----|-------------|----|---------------------------------------------------------------------------------------------------------------------------------------------------------------------------------------|-----------|
| 1  |             |    |                                                                                                                                                                                       |           |
| 2  | Sample size | 14 | Estimated number of participants needed to achieve study objectives and how it was determined, including clinical and statistical assumptions supporting any sample size calculations | 11        |
| 3  |             |    |                                                                                                                                                                                       |           |
| 4  |             |    |                                                                                                                                                                                       |           |
| 5  |             |    |                                                                                                                                                                                       |           |
| 6  | Recruitment | 15 | Strategies for achieving adequate participant enrolment to reach target sample size                                                                                                   | In        |
| 7  |             |    |                                                                                                                                                                                       | Protocol, |
| 8  |             |    |                                                                                                                                                                                       | not       |
| 9  |             |    |                                                                                                                                                                                       | shown in  |
| 10 |             |    |                                                                                                                                                                                       | article   |
| 11 |             |    |                                                                                                                                                                                       |           |
| 12 |             |    |                                                                                                                                                                                       |           |

### Methods: Assignment of interventions (for controlled trials)

#### Allocation:

|    |                                  |     |                                                                                                                                                                                                                                                                                                                                                          |    |
|----|----------------------------------|-----|----------------------------------------------------------------------------------------------------------------------------------------------------------------------------------------------------------------------------------------------------------------------------------------------------------------------------------------------------------|----|
| 15 |                                  |     |                                                                                                                                                                                                                                                                                                                                                          |    |
| 16 |                                  |     |                                                                                                                                                                                                                                                                                                                                                          |    |
| 17 | Sequence generation              | 16a | Method of generating the allocation sequence (eg, computer-generated random numbers), and list of any factors for stratification. To reduce predictability of a random sequence, details of any planned restriction (eg, blocking) should be provided in a separate document that is unavailable to those who enrol participants or assign interventions | 9  |
| 18 |                                  |     |                                                                                                                                                                                                                                                                                                                                                          |    |
| 19 |                                  |     |                                                                                                                                                                                                                                                                                                                                                          |    |
| 20 |                                  |     |                                                                                                                                                                                                                                                                                                                                                          |    |
| 21 |                                  |     |                                                                                                                                                                                                                                                                                                                                                          |    |
| 22 |                                  |     |                                                                                                                                                                                                                                                                                                                                                          |    |
| 23 |                                  |     |                                                                                                                                                                                                                                                                                                                                                          |    |
| 24 |                                  |     |                                                                                                                                                                                                                                                                                                                                                          |    |
| 25 | Allocation concealment mechanism | 16b | Mechanism of implementing the allocation sequence (eg, central telephone; sequentially numbered, opaque, sealed envelopes), describing any steps to conceal the sequence until interventions are assigned                                                                                                                                                | 9  |
| 26 |                                  |     |                                                                                                                                                                                                                                                                                                                                                          |    |
| 27 |                                  |     |                                                                                                                                                                                                                                                                                                                                                          |    |
| 28 |                                  |     |                                                                                                                                                                                                                                                                                                                                                          |    |
| 29 |                                  |     |                                                                                                                                                                                                                                                                                                                                                          |    |
| 30 |                                  |     |                                                                                                                                                                                                                                                                                                                                                          |    |
| 31 | Implementation                   | 16c | Who will generate the allocation sequence, who will enrol participants, and who will assign participants to interventions                                                                                                                                                                                                                                | 9  |
| 32 |                                  |     |                                                                                                                                                                                                                                                                                                                                                          |    |
| 33 |                                  |     |                                                                                                                                                                                                                                                                                                                                                          |    |
| 34 | Blinding (masking)               | 17a | Who will be blinded after assignment to interventions (eg, trial participants, care providers, outcome assessors, data analysts), and how                                                                                                                                                                                                                | 10 |
| 35 |                                  |     |                                                                                                                                                                                                                                                                                                                                                          |    |
| 36 |                                  |     |                                                                                                                                                                                                                                                                                                                                                          |    |
| 37 |                                  |     |                                                                                                                                                                                                                                                                                                                                                          |    |
| 38 |                                  |     |                                                                                                                                                                                                                                                                                                                                                          |    |
| 39 |                                  | 17b | If blinded, circumstances under which unblinding is permissible, and procedure for revealing a participant's allocated intervention during the trial                                                                                                                                                                                                     | NA |
| 40 |                                  |     |                                                                                                                                                                                                                                                                                                                                                          |    |
| 41 |                                  |     |                                                                                                                                                                                                                                                                                                                                                          |    |
| 42 |                                  |     |                                                                                                                                                                                                                                                                                                                                                          |    |

### Methods: Data collection, management, and analysis

|    |                         |     |                                                                                                                                                                                                                                                                                                                                                                                                              |    |
|----|-------------------------|-----|--------------------------------------------------------------------------------------------------------------------------------------------------------------------------------------------------------------------------------------------------------------------------------------------------------------------------------------------------------------------------------------------------------------|----|
| 43 |                         |     |                                                                                                                                                                                                                                                                                                                                                                                                              |    |
| 44 |                         |     |                                                                                                                                                                                                                                                                                                                                                                                                              |    |
| 45 | Data collection methods | 18a | Plans for assessment and collection of outcome, baseline, and other trial data, including any related processes to promote data quality (eg, duplicate measurements, training of assessors) and a description of study instruments (eg, questionnaires, laboratory tests) along with their reliability and validity, if known. Reference to where data collection forms can be found, if not in the protocol | 11 |
| 46 |                         |     |                                                                                                                                                                                                                                                                                                                                                                                                              |    |
| 47 |                         |     |                                                                                                                                                                                                                                                                                                                                                                                                              |    |
| 48 |                         |     |                                                                                                                                                                                                                                                                                                                                                                                                              |    |
| 49 |                         |     |                                                                                                                                                                                                                                                                                                                                                                                                              |    |
| 50 |                         |     |                                                                                                                                                                                                                                                                                                                                                                                                              |    |
| 51 |                         |     |                                                                                                                                                                                                                                                                                                                                                                                                              |    |
| 52 |                         |     |                                                                                                                                                                                                                                                                                                                                                                                                              |    |
| 53 |                         | 18b | Plans to promote participant retention and complete follow-up, including list of any outcome data to be collected for participants who discontinue or deviate from intervention protocols                                                                                                                                                                                                                    | 11 |
| 54 |                         |     |                                                                                                                                                                                                                                                                                                                                                                                                              |    |
| 55 |                         |     |                                                                                                                                                                                                                                                                                                                                                                                                              |    |
| 56 |                         |     |                                                                                                                                                                                                                                                                                                                                                                                                              |    |
| 57 |                         |     |                                                                                                                                                                                                                                                                                                                                                                                                              |    |
| 58 |                         |     |                                                                                                                                                                                                                                                                                                                                                                                                              |    |
| 59 |                         |     |                                                                                                                                                                                                                                                                                                                                                                                                              |    |
| 60 |                         |     |                                                                                                                                                                                                                                                                                                                                                                                                              |    |

|    |             |     |                                                                    |     |
|----|-------------|-----|--------------------------------------------------------------------|-----|
| 1  |             |     |                                                                    |     |
| 2  | Data        | 19  | Plans for data entry, coding, security, and storage, including any | 11  |
| 3  | management  |     | related processes to promote data quality (eg, double data entry;  |     |
| 4  |             |     | range checks for data values). Reference to where details of data  |     |
| 5  |             |     | management procedures can be found, if not in the protocol         |     |
| 6  |             |     |                                                                    |     |
| 7  | Statistical | 20a | Statistical methods for analysing primary and secondary            | 12  |
| 8  | methods     |     | outcomes. Reference to where other details of the statistical      |     |
| 9  |             |     | analysis plan can be found, if not in the protocol                 |     |
| 10 |             |     |                                                                    |     |
| 11 |             |     |                                                                    |     |
| 12 |             | 20b | Methods for any additional analyses (eg, subgroup and adjusted     | 12  |
| 13 |             |     | analyses)                                                          |     |
| 14 |             |     |                                                                    |     |
| 15 |             | 20c | Definition of analysis population relating to protocol non-        | 112 |
| 16 |             |     | adherence (eg, as randomised analysis), and any statistical        |     |
| 17 |             |     | methods to handle missing data (eg, multiple imputation)           |     |
| 18 |             |     |                                                                    |     |
| 19 |             |     |                                                                    |     |

### Methods: Monitoring

|    |            |     |                                                                    |    |
|----|------------|-----|--------------------------------------------------------------------|----|
| 20 |            |     |                                                                    |    |
| 21 | Data       | 21a | Composition of data monitoring committee (DMC); summary of its     | 11 |
| 22 | monitoring |     | role and reporting structure; statement of whether it is           |    |
| 23 |            |     | independent from the sponsor and competing interests; and          |    |
| 24 |            |     | reference to where further details about its charter can be found, |    |
| 25 |            |     | if not in the protocol. Alternatively, an explanation of why a DMC |    |
| 26 |            |     | is not needed                                                      |    |
| 27 |            |     |                                                                    |    |
| 28 |            |     |                                                                    |    |
| 29 |            |     |                                                                    |    |
| 30 |            | 21b | Description of any interim analyses and stopping guidelines,       | NA |
| 31 |            |     | including who will have access to these interim results and make   |    |
| 32 |            |     | the final decision to terminate the trial                          |    |
| 33 |            |     |                                                                    |    |
| 34 | Harms      | 22  | Plans for collecting, assessing, reporting, and managing solicited | 11 |
| 35 |            |     | and spontaneously reported adverse events and other                |    |
| 36 |            |     | unintended effects of trial interventions or trial conduct         |    |
| 37 |            |     |                                                                    |    |
| 38 |            |     |                                                                    |    |
| 39 | Auditing   | 23  | Frequency and procedures for auditing trial conduct, if any, and   | 11 |
| 40 |            |     | whether the process will be independent from investigators and     |    |
| 41 |            |     | the sponsor                                                        |    |
| 42 |            |     |                                                                    |    |

### Ethics and dissemination

|    |            |     |                                                                  |    |
|----|------------|-----|------------------------------------------------------------------|----|
| 43 |            |     |                                                                  |    |
| 44 |            |     |                                                                  |    |
| 45 | Research   | 24  | Plans for seeking research ethics committee/institutional review | 13 |
| 46 | ethics     |     | board (REC/IRB) approval                                         |    |
| 47 | approval   |     |                                                                  |    |
| 48 |            |     |                                                                  |    |
| 49 |            |     |                                                                  |    |
| 50 | Protocol   | 25  | Plans for communicating important protocol modifications (eg,    | 13 |
| 51 | amendments |     | changes to eligibility criteria, outcomes, analyses) to relevant |    |
| 52 |            |     | parties (eg, investigators, REC/IRBs, trial participants, trial  |    |
| 53 |            |     | registries, journals, regulators)                                |    |
| 54 |            |     |                                                                  |    |
| 55 |            |     |                                                                  |    |
| 56 | Consent or | 26a | Who will obtain informed consent or assent from potential trial  | 13 |
| 57 | assent     |     | participants or authorised surrogates, and how (see Item 32)     |    |
| 58 |            |     |                                                                  |    |
| 59 |            |     |                                                                  |    |
| 60 |            |     |                                                                  |    |

|    |                               |     |                                                                                                                                                                                                                                                                                     |
|----|-------------------------------|-----|-------------------------------------------------------------------------------------------------------------------------------------------------------------------------------------------------------------------------------------------------------------------------------------|
| 1  |                               |     |                                                                                                                                                                                                                                                                                     |
| 2  |                               | 26b | Additional consent provisions for collection and use of participant data and biological specimens in ancillary studies, if applicable                                                                                                                                               |
| 3  |                               |     | NA                                                                                                                                                                                                                                                                                  |
| 4  |                               |     |                                                                                                                                                                                                                                                                                     |
| 5  | Confidentiality               | 27  | How personal information about potential and enrolled participants will be collected, shared, and maintained in order to protect confidentiality before, during, and after the trial                                                                                                |
| 6  |                               |     | In                                                                                                                                                                                                                                                                                  |
| 7  |                               |     | protocol                                                                                                                                                                                                                                                                            |
| 8  |                               |     | , not                                                                                                                                                                                                                                                                               |
| 9  |                               |     | shown in                                                                                                                                                                                                                                                                            |
| 10 |                               |     | article                                                                                                                                                                                                                                                                             |
| 11 |                               |     |                                                                                                                                                                                                                                                                                     |
| 12 | Declaration of interests      | 28  | Financial and other competing interests for principal investigators for the overall trial and each study site                                                                                                                                                                       |
| 13 |                               |     | 15                                                                                                                                                                                                                                                                                  |
| 14 |                               |     |                                                                                                                                                                                                                                                                                     |
| 15 | Access to data                | 29  | Statement of who will have access to the final trial dataset, and disclosure of contractual agreements that limit such access for investigators                                                                                                                                     |
| 16 |                               |     | 15                                                                                                                                                                                                                                                                                  |
| 17 |                               |     |                                                                                                                                                                                                                                                                                     |
| 18 |                               |     |                                                                                                                                                                                                                                                                                     |
| 19 | Ancillary and post-trial care | 30  | Provisions, if any, for ancillary and post-trial care, and for compensation to those who suffer harm from trial participation                                                                                                                                                       |
| 20 |                               |     | In                                                                                                                                                                                                                                                                                  |
| 21 |                               |     | protocol                                                                                                                                                                                                                                                                            |
| 22 |                               |     | , not                                                                                                                                                                                                                                                                               |
| 23 |                               |     | shown in                                                                                                                                                                                                                                                                            |
| 24 |                               |     | article                                                                                                                                                                                                                                                                             |
| 25 |                               |     |                                                                                                                                                                                                                                                                                     |
| 26 | Dissemination policy          | 31a | Plans for investigators and sponsor to communicate trial results to participants, healthcare professionals, the public, and other relevant groups (eg, via publication, reporting in results databases, or other data sharing arrangements), including any publication restrictions |
| 27 |                               |     | 13                                                                                                                                                                                                                                                                                  |
| 28 |                               |     |                                                                                                                                                                                                                                                                                     |
| 29 |                               |     |                                                                                                                                                                                                                                                                                     |
| 30 |                               |     |                                                                                                                                                                                                                                                                                     |
| 31 |                               |     |                                                                                                                                                                                                                                                                                     |
| 32 |                               |     |                                                                                                                                                                                                                                                                                     |
| 33 |                               | 31b | Authorship eligibility guidelines and any intended use of professional writers                                                                                                                                                                                                      |
| 34 |                               |     | In                                                                                                                                                                                                                                                                                  |
| 35 |                               |     | protocol                                                                                                                                                                                                                                                                            |
| 36 |                               |     | , not                                                                                                                                                                                                                                                                               |
| 37 |                               |     | shown in                                                                                                                                                                                                                                                                            |
| 38 |                               |     | article                                                                                                                                                                                                                                                                             |
| 39 |                               |     |                                                                                                                                                                                                                                                                                     |
| 40 |                               | 31c | Plans, if any, for granting public access to the full protocol, participant-level dataset, and statistical code                                                                                                                                                                     |
| 41 |                               |     | NA                                                                                                                                                                                                                                                                                  |
| 42 |                               |     |                                                                                                                                                                                                                                                                                     |
| 43 |                               |     |                                                                                                                                                                                                                                                                                     |
| 44 | <b>Appendices</b>             |     |                                                                                                                                                                                                                                                                                     |
| 45 |                               |     |                                                                                                                                                                                                                                                                                     |
| 46 | Informed consent materials    | 32  | Model consent form and other related documentation given to participants and authorised surrogates                                                                                                                                                                                  |
| 47 |                               |     | Consent form                                                                                                                                                                                                                                                                        |
| 48 |                               |     | has                                                                                                                                                                                                                                                                                 |
| 49 |                               |     | been                                                                                                                                                                                                                                                                                |
| 50 |                               |     | approved.                                                                                                                                                                                                                                                                           |
| 51 |                               |     |                                                                                                                                                                                                                                                                                     |
| 52 |                               |     |                                                                                                                                                                                                                                                                                     |
| 53 |                               |     |                                                                                                                                                                                                                                                                                     |
| 54 | Biological specimens          | 33  | Plans for collection, laboratory evaluation, and storage of biological specimens for genetic or molecular analysis in the current trial and for future use in ancillary studies, if applicable                                                                                      |
| 55 |                               |     | NA                                                                                                                                                                                                                                                                                  |
| 56 |                               |     |                                                                                                                                                                                                                                                                                     |
| 57 |                               |     |                                                                                                                                                                                                                                                                                     |

\*It is strongly recommended that this checklist be read in conjunction with the SPIRIT 2013 Explanation & Elaboration for important clarification on the items. Amendments to the



1  
2  
3  
4  
5  
6  
7  
8  
9  
10  
11  
12  
13  
14  
15  
16  
17  
18  
19  
20  
21  
22  
23  
24  
25  
26  
27  
28  
29  
30  
31  
32  
33  
34  
35  
36  
37  
38  
39  
40  
41  
42  
43  
44  
45  
46  
47  
48  
49  
50  
51  
52  
53  
54  
55  
56  
57  
58  
59  
60

protocol should be tracked and dated. The SPIRIT checklist is copyrighted by the SPIRIT Group under the Creative Commons "[Attribution-NonCommercial-NoDerivs 3.0 Unported](#)" license.

For peer review only

# BMJ Open

## Efficacy and Safety of Tirofiban in Patients with Acute Branch Atherosclerotic Disease(BAD)-Related Stroke (BRANT): Protocol for a Randomized Controlled Trial

|                                 |                                                                                                                                                                                                                                                                                                                                                                                                                                 |
|---------------------------------|---------------------------------------------------------------------------------------------------------------------------------------------------------------------------------------------------------------------------------------------------------------------------------------------------------------------------------------------------------------------------------------------------------------------------------|
| Journal:                        | <i>BMJ Open</i>                                                                                                                                                                                                                                                                                                                                                                                                                 |
| Manuscript ID                   | bmjopen-2023-082141.R1                                                                                                                                                                                                                                                                                                                                                                                                          |
| Article Type:                   | Protocol                                                                                                                                                                                                                                                                                                                                                                                                                        |
| Date Submitted by the Author:   | 23-Feb-2024                                                                                                                                                                                                                                                                                                                                                                                                                     |
| Complete List of Authors:       | Li, Shengde; Peking Union Medical College Hospital, dingding, zhang; peking union medical college hopspital Sha, Yuhui; Peking Union Medical College, Department of Neurology yicheng, zhu; Peking Union Medical College Hospital, Neurology Zhou, Lixin; Peking Union Medical College, Department of Neurology Peng, Bin; Peking Union Medical College Hospital Ni, Jun; Peking Union Medical College, Department of Neurology |
| <b>Primary Subject Heading</b>: | Neurology                                                                                                                                                                                                                                                                                                                                                                                                                       |
| Secondary Subject Heading:      | Cardiovascular medicine                                                                                                                                                                                                                                                                                                                                                                                                         |
| Keywords:                       | Stroke < NEUROLOGY, Prognosis, THERAPEUTICS                                                                                                                                                                                                                                                                                                                                                                                     |
|                                 |                                                                                                                                                                                                                                                                                                                                                                                                                                 |

SCHOLARONE™  
Manuscripts

1  
2  
3  
4 **Efficacy and Safety of Tirofiban in Patients with Acute Branch Atherosclerotic**  
5  
6 **Disease(BAD)-Related Stroke (BRANT): Protocol for a Randomized Controlled**  
7  
8  
9 **Trial**  
10

11 **Authors:** Shengde Li, MD;1 Dingding Zhang, PhD;2 Yuhui Sha, MD;1 Yicheng Zhu,  
12  
13  
14 MD;1 Lixin Zhou, MD;1 Bin Peng, MD;1 Jun Ni, MD.1  
15  
16

17  
18  
19 1 Department of Neurology, State Key Laboratory of Complex Severe and Rare  
20  
21 Diseases, Peking Union Medical College Hospital, Chinese Academy of Medical  
22  
23 Science and Peking Union Medical College, Beijing, China.  
24  
25

26  
27 2 Medical Research Center, State Key laboratory of Complex Severe and Rare Diseases,  
28  
29 Peking Union Medical College Hospital, Chinese Academy of Medical Sciences and  
30  
31 Peking Union Medical College, Beijing, China.  
32  
33

34  
35 **Corresponding author:**  
36

37 Jun Ni, MD  
38

39  
40 Department of Neurology, Peking Union Medical College Hospital, Beijing, China.  
41

42  
43 Department of Neurology, Peking Union Medical College Hospital, Shuaifuyuan1,  
44  
45 Dong Cheng District, Beijing, 100730, China  
46

47  
48 Phone: +86 10 69156371  
49

50  
51 Fax: +86 10 69156371  
52

53  
54 E-mail: pumchnijun@163.com  
55

56 **Total word count: 4077**  
57  
58  
59  
60

## Abstract

**Introduction:** Branch atheromatous disease (BAD)-related stroke is increasingly becoming a clinical entity and prone to early neurological deterioration (END) and poor prognosis. There are no effective regimens to reduce the disability caused by BAD-related stroke in acute phase. Recent studies have indicated the efficacy of tirofiban in acute ischemic stroke, however, its efficacy has not been validated in patients with BAD-related stroke. Thus, we aim to test whether intravenous tirofiban initiated within 48 hours after onset would safely improve the functional outcome in patients with acute BAD-related stroke, in comparison with standard antiplatelet therapy based on the current guideline.

**Methods and analysis:** BRANT is a multicenter, randomized, open-label, blinded endpoint, parallel-controlled, phase III trial conducted in 21 hospitals in China. Participants aged 18-75 years with acute BAD-related stroke within 48 h after stroke onset are randomized in a 1:1 ratio to the tirofiban or control group. The treatment period is 48 hours in both groups. The primary outcome is the excellent functional outcome (modified Rankin Scale score: 0-1) at 90 days. The secondary outcomes include END, major bleeding, stroke, death, functional status, serious adverse events, and change in bleeding-related markers. Assuming the rates of the primary outcome to be 74% in the tirofiban group and 62% in the control group, a total of 516 participants are needed for 0.8 power (two-sided 0.05 alpha).

**Ethics and dissemination:** BRANT study has been approved by the Ethics Committee of the Peking Union Medical College Hospital. Written informed consent is required

1  
2  
3  
4 for all patients before enrollment. The results of the study will be published in a peer-  
5  
6 reviewed journal.  
7

8  
9 **Trial registration number** ClinicalTrials.gov (NCT06037889)  
10

11 **Keywords:** Branch Atheromatous Disease, Acute ischemic stroke, Early neurological  
12  
13 deterioration, Functional outcome, Tirofiban, Treatment  
14  
15  
16  
17  
18  
19  
20  
21  
22  
23  
24  
25  
26  
27  
28  
29  
30  
31  
32  
33  
34  
35  
36  
37  
38  
39  
40  
41  
42  
43  
44  
45  
46  
47  
48  
49  
50  
51  
52  
53  
54  
55  
56  
57  
58  
59  
60

For peer review only

### Strengths and limitations of this study

1. With the aid of magnetic resonance imaging, this study focuses on patients with acute BAD-related stroke, which had been inappropriately classified as small-vessel occlusion or an undetermined aetiology by the TOAST system in previous studies.
2. This study is designed to test the efficacy of tirofiban initiated within 48 h of onset, with the aim of addressing the current treatment dilemma in the acute phase.
3. Lack of double-blinded design is a limitation, but the endpoints are measured in a blinded manner.

## Introduction

Branch atheromatous disease (BAD), first described conceptually by Caplan in 1989, is being confirmed as a clinical entity with the aid of advanced neuroimaging.[1-3] BAD-related stroke, characterized by subcortical single infarcts in penetrating artery territories without severe stenosis of the large parent artery, accounts for 20.4% of all ischaemic stroke cases in Asian populations[2 4]. Differing from lacunar infarct due to lipohyalinosis, BAD-related stroke is caused by parent arterial plaque occlusion of the perforating orifice or proximal atherosclerotic occlusion of the perforating artery[1-3], which could be identified from small-vessel occlusion or stroke of undetermined source in the TOAST system[5 6].

High incidence of early neurological deterioration (END) has been observed in BAD-related stroke and is strongly associated with poor prognosis[7 8]. The rate of END is higher in BAD-related stroke than lacunar infarct (26.8-37.5% vs. 6.3-18.6%), and thrombolysis itself cannot prevent the occurrence of END[7-9]. In addition, it remains unclear whether intravenous thrombolysis could improve the clinical outcome in BAD-related stroke[10]. The rate of disability can reach 61%[2]. However, there are no high-level recommendations for acute-phase treatment of BAD-related stroke, and no RCT has examined BAD as a separate disease. Current practice—based on limited observational data and expert opinion—is heterogeneous, including anticoagulant and mono/dual antiplatelet therapy, the efficacy of which is uncertain for BAD-related stroke[11 12].

Tirofiban, a selective and reversible antagonist of glycoprotein IIb/IIIa inhibitors on

1  
2  
3  
4 platelets, might be more effective than conventional agents (such as aspirin or  
5  
6 clopidogrel) by blocking the final common pathway of platelet aggregation at the  
7  
8 pathophysiological level[13]. In clinical studies, historical evidence has also reported  
9  
10 that tirofiban increases the recanalization rate and improves functional prognosis in  
11  
12 stroke patients with endovascular therapy without increasing bleeding risk[14-16]. A  
13  
14 large randomized trial of patients with stroke without large or medium-sized vessel  
15  
16 occlusion also reported the efficacy of tirofiban[17]. However, though an  
17  
18 atherosclerotic mechanism is presumed to exist between BAD and large artery  
19  
20 atherosclerosis, this evidence may not be generalized to BAD-related stroke, as  
21  
22 retrospective data or small samples may introduce selection bias[14 18]. Moreover,  
23  
24 about 78.6%-90.9% of END occurs within 48 h after onset[19 20]. Our preliminary  
25  
26 results of a cohort with BAD-related stroke found that the median time from onset to  
27  
28 END was 38 h. We hypothesised that early tirofiban administration could improve  
29  
30 functional prognosis by preventing the occurrence of END. However, tirofiban was  
31  
32 often prescribed after END in previous studies, which might cause irreversible ischemic  
33  
34 lesions and neurologic deficits[14 17]. Thus, randomised controlled trials of acute  
35  
36 BAD-related stroke are needed and have been requested by researchers[3 4]. In addition,  
37  
38 we speculated that tirofiban should be initiated within 48 h after onset to prevent the  
39  
40 occurrence of END.  
41  
42  
43  
44  
45  
46  
47  
48  
49  
50  
51

52  
53 The BRANT trial aims to establish the efficacy and safety of intravenous tirofiban for  
54  
55 improving functional outcome in patients with acute BAD-related stroke.  
56  
57  
58  
59  
60



## Methods

### Design

This is a multicenter, randomized, open-label, blinded-endpoint, parallel-controlled phase III trial. The BRANT study began enrolment on November 9, 2023, and the anticipated date of study completion is October 31, 2025.

### Patient population

BRANT will enroll 516 participants with BAD-related stroke within 48 hours of onset, from 21 centers in China.

### Inclusion criteria

- Age: 18-75 years old [21 22]
- Acute ischemic stroke
- Time from onset to randomization  $\leq 48\text{h}$ ; if onset time is unknown, time from last known well to randomization  $\leq 48\text{h}$
- Meet the following BAD Diagnostic Imaging Criteria
  1. Diffusion Weighted Imaging (DWI) infarcts: single (isolated) deep (subcortical) infarcts;
  2. The culprit arteries are either lenticulostriate artery (LSA) or paramedian pontine artery (PPA), and the infarct lesion on DWI conforms to one of the following characteristics (A/B):
    - A. LSA: “Comma-like” infarct lesions with “fan-shaped” extension from bottom to top in the coronal position; or  $\geq 3$  layers (layer thickness 5–7 mm) on axial DWI brain images;

1  
2  
3  
4 B. PPA: The infarct lesion extends from the deep pons to the ventral pons on  
5  
6 the axial DWI brain images;

- 7  
8  
9 ● No more than 50% stenosis on the parent artery of the criminal artery (i.e.  
10  
11 corresponding basilar or middle cerebral artery) (Confirmed by magnetic  
12  
13 resonance angiography[MRA]/ computed tomography angiography [CTA]/  
14  
15 digital subtraction angiography [DSA])  
16  
17  
18 ● Signed informed consent by the patient or legally authorized representatives.  
19  
20  
21

### 22 **Exclusion criteria**

- 23  
24 ● Transient ischemic attack (TIA)  
25  
26  
27 ● Intracranial hemorrhagic diseases, vascular malformations, aneurysms, brain  
28  
29 abscesses, malignant space-occupying lesions, or other non- ischemic  
30  
31 intracranial lesions detected by baseline computed tomography(CT)/ magnetic  
32  
33 resonance imaging (MRI), or MRA/CTA/ DSA  
34  
35  
36 ● Presence of  $\geq 50\%$  stenosis in extracranial artery in tandem relationship  
37  
38 ipsilateral to the lesion  
39  
40  
41  
42 ● Cardiogenic embolism: atrial fibrillation, myocardial infarction, heart valve  
43  
44 disease, dilated cardiomyopathy, infective endocarditis, atrioventricular block  
45  
46 disease, heart rate less than 50 beats per minute  
47  
48  
49  
50 ● Have received or plan to receive endovascular therapy or thrombolysis after  
51  
52 onset  
53  
54  
55 ● Stroke of other clear causes, e.g., moyamoya disease, arterial entrapment,  
56  
57 vasculitis, etc.  
58  
59  
60

- modified Rankin Scale  $\geq 2$  before onset
- Use of tirofiban within 1 week before or after onset
- Low platelets ( $<100 \times 10^9/L$ ), or prothrombin time  $>1.3$  times of the upper normal limit, or international normalised ratio (INR)  $>1.5$ , or other systemic hemorrhagic tendencies such as hematologic disorders
- Elevation of alanine aminotransferase (ALT) or aspartate aminotransferase (AST) more than 1.5 times the upper normal limit
- Glomerular filtration rate  $<60$  mL/min/1.73m<sup>2</sup>
- Known malignant tumors
- History of trauma or major surgical intervention within 6 weeks prior to onset
- History of intracranial hemorrhage
- Active or recent history (within 30 days prior to onset) of clinical bleeding (e.g., gastrointestinal bleeding)
- Malignant hypertension (systolic blood pressure  $>200$  mmHg, or diastolic blood pressure  $>120$  mmHg)
- Life expectancy  $\leq 6$  months
- Contraindications of 3 T MRI examination
- Pregnant or lactating women
- Have participated in another clinical trial within 3 months prior to the date of informed consent or are participating in another clinical trial

## Randomization

1  
2  
3  
4 Participants will be randomized in a 1:1 ratio using a dynamic block randomization  
5  
6 method via an independent central website. The block sizes were set to 6, 8, and 12.  
7  
8  
9 The allocation sequence is stored on the central website and the participant will be  
10  
11 assigned to the intervention or control group in a 1:1 ratio according to the order of  
12  
13 enrolment.  
14  
15

### 16 17 18 19 **Intervention**

20  
21  
22 Tirofiban group: Intravenous tirofiban will be administered immediately after  
23  
24 randomization for a total duration of 48 hours with a loading dose of 0.4µg  
25  
26 /kg/min×30min, followed by a maintenance dose of 0.1µg /kg/min×47.5h (Figure1).  
27  
28

29  
30 Control group: Standard antiplatelet therapy based on Chinese stroke guideline will be  
31  
32 initiated after randomization for a total duration of 48 hours, as the two following types:  
33  
34 (1) aspirin 150-300 mg qd, or (2) aspirin 100 mg qd plus clopidogrel 75 mg qd.[23] Its  
35  
36 initiation will be determined based on the last administration time of antithrombotic  
37  
38 drugs; however, the drug should be administered as soon as possible.  
39  
40

41  
42 After a 48-hour treatment period in both groups, the standard of care, including an  
43  
44 antithrombotic regimen, will be performed based on current guidelines and recorded in  
45  
46 detail (Figure 1).  
47  
48

### 49 50 **Primary outcomes**

51  
52 The primary outcome is excellent functional outcome at 90 days, defined as modified  
53  
54 Rankin Scale score of 0-1.[24] Primary outcome will be measured by the qualified  
55  
56 evaluators who are blinded to all procedures.  
57  
58  
59  
60

## Secondary outcomes

Secondary efficacy outcomes include END, National Institutes of Health Stroke Scale (NIHSS) score, Barthel index score, ischemic stroke, stroke, TIA, and a composite event of new-onset stroke, myocardial infarction, and all-cause death. Safety outcomes include the proportion of major bleeding as defined by the PLATO criteria, adverse events, all-cause death, and changes in bleeding-related markers[25]. The evaluators will not be aware of the treatment assignment after randomization. All the clinical and safety events will be re-examined by the independent Clinical Event Committee (CEC), who will be blinded during all procedures.

Considering the predictive value of END, we adopted the widely used and conservative definition of END for the BRANT study[26]. The presence of END is determined by an increase of  $\geq 4$  points in the NIHSS or an increase of  $\geq 2$  points in the NIHSS motor score. The NIHSS motor score refers to bilateral upper and lower extremity mobility scores. The baseline NIHSS score for the calculation of END is the first clinician evaluated and recorded NIHSS score after onset. The time frame for post-randomisation END is within 7 days of randomization.

## Study protocol and data management

A study flowchart is shown in Figure 1 and Table S1. At visit 1, trained investigators will recruit patients based on screening age, onset time, MRI, and other enrolment criteria (i.e. intracranial artery and electrocardiogram). The investigator will then explain the BRANT study to the patient in detail, including the contents of each visit

1  
2  
3  
4 and the interventions. After obtaining written informed consent, the participants will be  
5  
6 assigned to the tirofiban or control groups via a central website-based randomization  
7  
8 system. Patients are encouraged to undergo on-site follow-up at 90 days. Demographic,  
9  
10 clinical, radiological, laboratory, and clinical event data at each visit (Table S1) will be  
11  
12 collected and stored in an electronic case report form (CRF) via a secure website. All  
13  
14 CRFs will be checked by local investigators for completeness and correction prior to  
15  
16 data entry. The data will be checked dynamically by the principal investigator (Jun Ni)  
17  
18 with the aid of research assistants.  
19  
20  
21  
22  
23  
24  
25  
26

### 27 **Data Monitoring Board**

28  
29 An independent Data Security Monitoring Board (DSMB), including academic experts  
30  
31 and statisticians, has been established to protect the interests of the participants during  
32  
33 the study. The DSMB will review the overall implementation of the clinical study and  
34  
35 regularly and dynamically assess the risks and benefits, particularly unexpected adverse  
36  
37 events. The DSMB reports to the Executive Committee and provides professional  
38  
39 advice.  
40  
41  
42  
43  
44  
45  
46  
47

### 48 **Sample size estimates**

49  
50 Based on previous studies and clinical practice, we assumed the rates of the primary  
51  
52 outcome to be 62% and 74% in the control and tirofiban groups, respectively[2 14-16  
53  
54 18 27-29]. Thus, 234 participants per arm are needed for a two-sided test at alpha 0.05  
55  
56 and power 0.8. Considering a dropout rate of 10%, 516 patients will be required.  
57  
58  
59  
60

## Statistical analyses

According to the principle of intention-to-treat analysis, all participants who are randomized into groups with more than one efficacy evaluation will be included in the full analysis set. The estimation of missing values will be conducted by the carry-over based on last observation carried forward (LOCF) estimation method. The proportion of excellent outcomes at 90 days will be compared using the chi-square tests, and shown as frequency (percentage). Most secondary outcome analyses will also use the primary outcome analysis strategy. Survival data will be calculated using the Kaplan-Meier method to estimate the survival rate in each group, and efficacy will be assessed using the log-rank test. Hazard ratios (HRs) and 95% confidence intervals (CI) will be calculated using the Cox proportional hazards model. Non-survival data will be analysed using the chi-square test, and odds ratios and 95% CIs will be calculated. Continuous variables will be compared between the two groups using the Student's t-test or Wilcoxon rank-sum test. The influence of covariables will be evaluated using subgroup analysis. All analyses will be performed using SAS 9.4, and a two-sided  $P < 0.05$  is considered significant.

## Patient and public involvement statement

None.

1  
2  
3  
4 **Ethics and dissemination:** The BRANT study was approved by the Ethics Committee  
5  
6 of Peking Union Medical College Hospital on July 20, 2023. Written informed consent  
7  
8 is required from all patients before enrolment. BRANT will be carried out according to  
9  
10 Good Clinical Practice and the Declaration of Helsinki. Protocol amendments will be  
11  
12 reported to the institutional ethics committee. The trial sponsor is Peking Union  
13  
14 Medical College Hospital. The trial results will be published in a peer-reviewed journal.  
15  
16  
17  
18  
19  
20  
21

## 22 **Discussion**

23  
24 The BRANT trial is a multicentre RCT that addresses the important treatment dilemma  
25  
26 of improving the functional outcomes of BAD-related stroke.  
27  
28

29  
30 BAD was first proposed by Caplan in 1989 to be distinct from lacunar infarct[1].  
31  
32 However, in the past three decades, most clinical studies have classified BAD as small-  
33  
34 vessel occlusion or undetermined etiology based on the TOAST system[4 30]. Few  
35  
36 studies focused on acute BAD-related stroke, probably due to discrepant definitions[3].  
37  
38 Recently, an increasing number of observational studies found distinct clinical,  
39  
40 radiologic, and prognostic features that patients with BAD-related stroke are prone to  
41  
42 END and poor prognosis[2 31].  
43  
44  
45  
46  
47

48 Owing to the limitations of neuroimaging techniques, the perforating artery, such as the  
49  
50 LSA or PPA, cannot be directly visualized. Radiological diagnosis is based on the  
51  
52 vascular territory, dimension, or shape of the lesion[3 32], which results in a huge  
53  
54 variations among BAD definitions. With the aid of neuroimaging and clinical practice,  
55  
56 Asian neurologists proposed radiological diagnosis criteria for BAD[33 34]. Our  
57  
58  
59  
60



1  
2  
3  
4 previous study also found that  $\geq 4$  consecutive slices on axial view are more effective  
5  
6 than transversal diameter to differentiate atherosclerotic mechanisms of single  
7  
8 subcortical infarction in the LSA territory[35]. Considering the generalisation and  
9  
10 diagnostic accuracy of our study, we used  $\geq 3$  consecutive layers on axial DWI series  
11  
12 instead of lesion diameter to define BAD-related stroke in the LSA territory[36].  
13  
14 Because obtaining direct evidence of the LSA and PPA is currently not technically  
15  
16 feasible, our inclusion criteria based on MRI show considerable accuracy and  
17  
18 representativeness.  
19  
20  
21  
22  
23

24 In addition, our study uses simplified operationalised criteria to exclude cardiogenic  
25  
26 embolism, and patients with these comorbidities will not be included. Some conditions  
27  
28 seem general, which is a limitation of our study; however, this facilitates the  
29  
30 researcher's ability to complete screening within a limited timeframe with low  
31  
32 inconsistency.  
33  
34  
35  
36

37 We set a 90-day excellent outcome instead of END or new-onset stroke as the primary  
38  
39 outcome for the following reasons: (1) historical evidence indicated that tirofiban  
40  
41 improved the functional outcome of ischemic stroke[14 17]; (2) END is an intermediate  
42  
43 indicators[7]; (3) the 90-day rate of recurrent stroke is 1.8% in our preliminary analysis  
44  
45 of a BAD-related stroke cohort and probably less than 3.8% in other cohorts[31], which  
46  
47 is relatively low. Thus, the BRANT study will provide direct evidence on how to reduce  
48  
49 disability caused by BAD, which is the major challenge in current clinical practice.  
50  
51  
52  
53

54 As oral mono antiplatelet therapy is unethical and against Chinese stroke guidelines for  
55  
56 patients with NIHSS  $\leq 3$ , there are two types of antiplatelet therapy in the control  
57  
58  
59  
60

1  
2  
3  
4 group[23]. A double-blind design would markedly increase the complexity of the trial  
5  
6 procedure. Therefore, we selected a prospective randomized open blinded end-point  
7  
8 design (PROBE) for BRANT. Independent senior neurologists who will be blinded to  
9  
10 the procedure information have been trained to evaluate the primary outcome. An  
11  
12 independent CEC has been established to centrally re-examine all clinical events after  
13  
14 randomization. Some local investigators may know the treatment allocation; however,  
15  
16 all evaluators of the subjective indicators will be blinded to the treatment allocation.  
17  
18  
19  
20  
21  
22  
23  
24

25 **Contributors:** Shengde Li, and Jun Ni designed the study. Shengde Li drafted the  
26  
27 manuscript. Dingding Zhang designed the statistical method. Yuhui Sha, Lixin Zhou,  
28  
29 Yicheng Zhu, and Bin Peng critically revised the study protocol and the manuscript.  
30  
31 The entire project will be supervised by Jun Ni.  
32  
33  
34

35 **Funding:** This study is funded by the National High Level Hospital Clinical Research  
36  
37 Funding (2022-PUMCH-D-007).  
38  
39

40 **Disclaimer:** The funder has no role in this study.  
41  
42

43 **Competing interests:** None declared.  
44

#### 45 **Data Availability Statement**

46  
47  
48 The data that support the findings of this study are available from the corresponding  
49  
50 author on reasonable request.  
51  
52  
53  
54  
55  
56  
57  
58  
59  
60

**References:**

1. Caplan LR. Intracranial branch atheromatous disease: a neglected, understudied, and underused concept. *Neurology* 1989;39(9):1246-50.
2. Kwan MW, Mak W, Cheung RT, et al. Ischemic stroke related to intracranial branch atheromatous disease and comparison with large and small artery diseases. *Journal of the neurological sciences* 2011;303(1-2):80-4.
3. Petrone L, Nannoni S, Del Bene A, et al. Branch Atheromatous Disease: A Clinically Meaningful, Yet Unproven Concept. *Cerebrovascular diseases (Basel, Switzerland)* 2016;41(1-2):87-95.
4. Kim BJ, Kim JS. Ischemic stroke subtype classification: an asian viewpoint. *Journal of stroke* 2014;16(1):8-17.
5. Uchiyama S, Toyoda K, Kitagawa K, et al. Branch atheromatous disease diagnosed as embolic stroke of undetermined source: A sub-analysis of NAVIGATE ESUS. *International journal of stroke : official journal of the International Stroke Society* 2019;14(9):915-22.
6. Wen L, Feng J, Zheng D. Heterogeneity of single small subcortical infarction can be reflected in lesion location. *Neurological sciences : official journal of the Italian Neurological Society and of the Italian Society of Clinical Neurophysiology* 2013;34(7):1109-16.
7. Duan Z, Fu C, Chen B, et al. Lesion patterns of single small subcortical infarct and its association with early neurological deterioration. *Neurological sciences : official journal of the Italian Neurological Society and of the Italian Society of Clinical Neurophysiology* 2015;36(10):1851-7.
8. Jeong HG, Kim BJ, Yang MH, et al. Neuroimaging markers for early neurologic deterioration in single small subcortical infarction. *Stroke* 2015;46(3):687-91.
9. Park MG, Oh EH, Kim BK, et al. Intravenous tissue plasminogen activator in acute branch atheromatous disease: Does it prevent early neurological deterioration? *Journal of clinical neuroscience : official journal of the Neurosurgical Society of Australasia* 2016;33:194-97.

10. Wu X, Liu Y, Nie C, et al. Efficacy and Safety of Intravenous Thrombolysis on Acute Branch Atheromatous Disease: A Retrospective Case-Control Study. *Frontiers in neurology* 2020;11:581.
11. Wang Q, Chen C, Chen XY, et al. Low-molecular-weight heparin and early neurologic deterioration in acute stroke caused by large artery occlusive disease. *Archives of neurology* 2012;69(11):1454-60.
12. Yi X, Zhou Q, Wang C, et al. Aspirin plus clopidogrel may reduce the risk of early neurologic deterioration in ischemic stroke patients carrying CYP2C19\*2 reduced-function alleles. *Journal of neurology* 2018;265(10):2396-403.
13. Schwarz M, Meade G, Stoll P, et al. Conformation-specific blockade of the integrin GPIIb/IIIa: a novel antiplatelet strategy that selectively targets activated platelets. *Circulation research* 2006;99(1):25-33.
14. Wu C, Sun C, Wang L, et al. Low-Dose Tirofiban Treatment Improves Neurological Deterioration Outcome After Intravenous Thrombolysis. *Stroke* 2019;50(12):3481-87.
15. Pan X, Zheng D, Zheng Y, et al. Safety and efficacy of tirofiban combined with endovascular treatment in acute ischaemic stroke. *European journal of neurology* 2019;26(8):1105-10.
16. Yang J, Wu Y, Gao X, et al. Intraarterial Versus Intravenous Tirofiban as an Adjunct to Endovascular Thrombectomy for Acute Ischemic Stroke. *Stroke* 2020;51(10):2925-33.
17. Zi W, Song J, Kong W, et al. Tirofiban for Stroke without Large or Medium-Sized Vessel Occlusion. *The New England journal of medicine* 2023;388(22):2025-36.
18. Liu B, Zhang H, Wang R, et al. Early administration of tirofiban after urokinase-mediated intravenous thrombolysis reduces early neurological deterioration in patients with branch atheromatous disease. *The Journal of international medical research* 2020;48(5):300060520926298.
19. Audebert HJ, Pellkofer TS, Wimmer ML, et al. Progression in lacunar stroke is related to elevated acute phase parameters. *European neurology*

- 2004;51(3):125-31.
20. Kim YS, Lee KY, Koh SH, et al. The role of matrix metalloproteinase 9 in early neurological worsening of acute lacunar infarction. *European neurology* 2006;55(1):11-5.
21. Januzzi JL, Jr., Sabatine MS, Wan Y, et al. Interactions between age, outcome of acute coronary syndromes, and tirofiban therapy. *The American journal of cardiology* 2003;91(4):457-61.
22. Li L, Geraghty OC, Mehta Z, et al. Age-specific risks, severity, time course, and outcome of bleeding on long-term antiplatelet treatment after vascular events: a population-based cohort study. *Lancet (London, England)* 2017;390(10093):490-99.
23. Chinese Society of Neurology, Cerebrovascular disease group of Chinese Society of Neurology. Chinese guidelines for diagnosis and treatment of acute ischemic stroke 2018. *Chin J Neurol.* 2018;51 9:666-682
24. van Swieten JC, Koudstaal PJ, Visser MC, et al. Interobserver agreement for the assessment of handicap in stroke patients. *Stroke* 1988;19(5):604-7.
25. Wallentin L, Becker RC, Budaj A, et al. Ticagrelor versus clopidogrel in patients with acute coronary syndromes. *The New England journal of medicine* 2009;361(11):1045-57.
26. Seners P, Turc G, Oppenheim C, et al. Incidence, causes and predictors of neurological deterioration occurring within 24 h following acute ischaemic stroke: a systematic review with pathophysiological implications. *Journal of neurology, neurosurgery, and psychiatry* 2015;86(1):87-94.
27. Wang H, Li X, Liu C, et al. Effects of Oral Antiplatelet Agents and Tirofiban on Functional Outcomes of Patients with Non-Disabling Minor Acute Ischemic Stroke. *Journal of stroke and cerebrovascular diseases : the official journal of National Stroke Association* 2020;29(8):104829.
28. Lin J, Han Z, Wang C, et al. Dual therapy with clopidogrel and aspirin prevents early neurological deterioration in ischemic stroke patients carrying CYP2C19\*2 reduced-function alleles. *Eur J Clin Pharmacol* 2018;74(9):1131-

- 1  
2  
3  
4 40.  
5  
6 29. Albers GW, Marks MP, Kemp S, et al. Thrombectomy for Stroke at 6 to 16 Hours  
7 with Selection by Perfusion Imaging. *The New England journal of medicine*  
8 2018;378(8):708-18.  
9  
10  
11 30. Uchiyama S, Toyoda K, Kitagawa K, et al. Branch atheromatous disease diagnosed  
12 as embolic stroke of undetermined source: A sub-analysis of NAVIGATE  
13 ESUS. *International journal of stroke : official journal of the International*  
14 *Stroke Society* 2019;14(9):915-22.  
15  
16  
17 31. Zhang C, Wang Y, Zhao X, et al. Distal single subcortical infarction had a better  
18 clinical outcome compared with proximal single subcortical infarction. *Stroke*  
19 2014;45(9):2613-9.  
20  
21  
22 32. Yamamoto Y, Ohara T, Hamanaka M, et al. Characteristics of intracranial branch  
23 atheromatous disease and its association with progressive motor deficits.  
24 *Journal of the neurological sciences* 2011;304(1-2):78-82.  
25  
26  
27 33. Adachi T, Takagi M. The clinical differences between lacunar infarction and branch  
28 atheromatous disease. *Nihon rinsho Japanese journal of clinical medicine*  
29 2006;64 Suppl 8:155-9.  
30  
31  
32 34. Zhou LX, Ni J. Advances in Branch Atheromatous Disease. *Chinese Stroke Journal*  
33 2020;15:1342- 1351.  
34  
35  
36 35. Cao Y, Zhang M, Zhou L, et al. Consecutive Slides on Axial View Is More Effective  
37 Than Transversal Diameter to Differentiate Mechanisms of Single Subcortical  
38 Infarctions in the Lenticulostriate Artery Territory. *Frontiers in neurology*  
39 2019;10:336.  
40  
41  
42 36. Investigators SPS, Benavente OR, Hart RG, et al. Effects of clopidogrel added to  
43 aspirin in patients with recent lacunar stroke. *The New England journal of*  
44 *medicine* 2012;367(9):817-25.  
45  
46  
47  
48  
49  
50  
51  
52  
53  
54  
55  
56  
57  
58  
59  
60

1  
2  
3  
4  
5  
6  
7  
8  
9  
10  
11  
12  
13  
14  
15  
16  
17  
18  
19  
20  
21  
22  
23  
24  
25  
26  
27  
28  
29  
30  
31  
32  
33  
34  
35  
36  
37  
38  
39  
40  
41  
42  
43  
44  
45  
46  
47  
48  
49  
50  
51  
52  
53  
54  
55  
56  
57  
58  
59  
60

**Figure I. Study Flow**

For peer review only

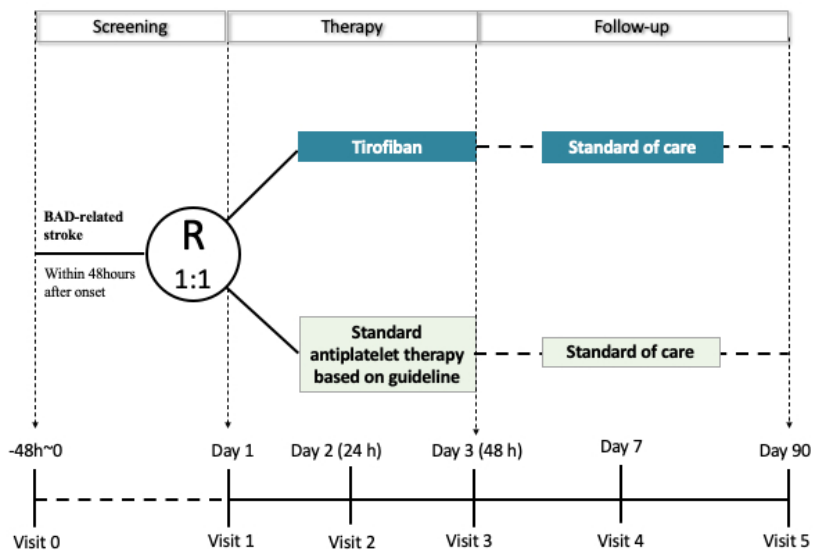

Figure 1. Study Flow

338x190mm (54 x 54 DPI)



## Supplementary materials

**Table S1. Study Procedure of BRANT trial**

| Measurement                                  | Day 1 | Day 2 | Day 3 | Day 7 | Day 90 |
|----------------------------------------------|-------|-------|-------|-------|--------|
| Demographic characteristics                  | X     |       |       |       |        |
| Current medical history taking               | X     |       |       |       |        |
| Body temperature measurement                 | X     |       |       |       |        |
| Physical examination                         | X     |       |       | X     | X      |
| Past medical history                         | X     |       |       |       |        |
| Pre-randomization medication after onset     | X     |       |       |       |        |
| Regular blood pressure monitoring            | X     | X     |       |       |        |
| NIHSS score                                  | X     |       |       | X     | X      |
| mRS score                                    | X     |       |       | X     | X      |
| Barthel index score                          | X     |       |       |       | X      |
| Magnetic resonance image                     | X     |       |       |       |        |
| Evaluation of Intracranial vessels           | X     |       |       |       |        |
| Evaluation of extracranial vessels           | X     |       |       |       |        |
| Laboratory tests*                            | X     |       |       |       |        |
| ECG*                                         | X     |       |       | X     |        |
| Verification of inclusion/exclusion criteria | X     |       |       |       |        |
| Signed informed consent                      | X     |       |       |       |        |
| Randomization                                | X     |       |       |       |        |
| Blood tests after enrollment                 |       | X     | X     |       |        |

|                                                                                                                                          |  |  |          |          |          |
|------------------------------------------------------------------------------------------------------------------------------------------|--|--|----------|----------|----------|
| Urine and fecal examination                                                                                                              |  |  | <b>X</b> |          |          |
| Compliance                                                                                                                               |  |  | <b>X</b> |          |          |
| Concomitant medication                                                                                                                   |  |  |          | <b>X</b> | <b>X</b> |
| Early neurological deterioration                                                                                                         |  |  |          | <b>X</b> |          |
| Major bleeding                                                                                                                           |  |  |          | <b>X</b> | <b>X</b> |
| Adverse Events/ Serious Adverse Events                                                                                                   |  |  |          | <b>X</b> | <b>X</b> |
| *Remarks: ECG and laboratory data performed within 48 hours of onset before signing the informed consent form can be used as trial data. |  |  |          |          |          |

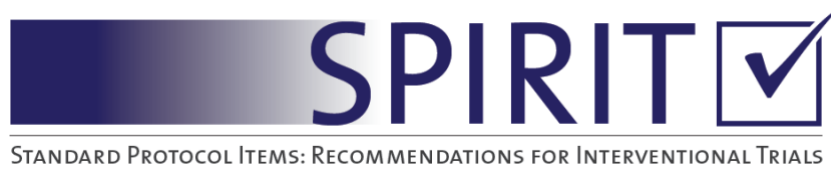

SPIRIT 2013 Checklist: Recommended items to address in a clinical trial protocol and related documents\*

| Section/item                      | Item No | Description                                                                                                                                                                                                                                                                              | Page                              |
|-----------------------------------|---------|------------------------------------------------------------------------------------------------------------------------------------------------------------------------------------------------------------------------------------------------------------------------------------------|-----------------------------------|
| <b>Administrative information</b> |         |                                                                                                                                                                                                                                                                                          |                                   |
| Title                             | 1       | Descriptive title identifying the study design, population, interventions, and, if applicable, trial acronym                                                                                                                                                                             | 1                                 |
| Trial registration                | 2a      | Trial identifier and registry name. If not yet registered, name of intended registry                                                                                                                                                                                                     | 2-3                               |
|                                   | 2b      | All items from the World Health Organization Trial Registration Data Set                                                                                                                                                                                                                 | Clinical Trials.gov               |
| Protocol version                  | 3       | Date and version identifier                                                                                                                                                                                                                                                              | In Protocol, not shown in article |
| Funding                           | 4       | Sources and types of financial, material, and other support                                                                                                                                                                                                                              | 16                                |
| Roles and responsibilities        | 5a      | Names, affiliations, and roles of protocol contributors                                                                                                                                                                                                                                  | 16                                |
|                                   | 5b      | Name and contact information for the trial sponsor                                                                                                                                                                                                                                       | Clinical Trials.gov               |
|                                   | 5c      | Role of study sponsor and funders, if any, in study design; collection, management, analysis, and interpretation of data; writing of the report; and the decision to submit the report for publication, including whether they will have ultimate authority over any of these activities | 16                                |
|                                   | 5d      | Composition, roles, and responsibilities of the coordinating centre, steering committee, endpoint adjudication committee, data management team, and other individuals or groups overseeing the trial, if applicable (see Item 21a for data monitoring committee)                         | 10-11                             |

**Introduction**

|    |                                                           |     |                                                                                                                                                                                                                                                                                                                                                                                |                                   |
|----|-----------------------------------------------------------|-----|--------------------------------------------------------------------------------------------------------------------------------------------------------------------------------------------------------------------------------------------------------------------------------------------------------------------------------------------------------------------------------|-----------------------------------|
| 1  |                                                           |     |                                                                                                                                                                                                                                                                                                                                                                                |                                   |
| 2  | Background and rationale                                  | 6a  | Description of research question and justification for undertaking the trial, including summary of relevant studies (published and unpublished) examining benefits and harms for each intervention                                                                                                                                                                             | 5-6                               |
| 3  |                                                           |     |                                                                                                                                                                                                                                                                                                                                                                                |                                   |
| 4  |                                                           |     |                                                                                                                                                                                                                                                                                                                                                                                |                                   |
| 5  |                                                           |     |                                                                                                                                                                                                                                                                                                                                                                                |                                   |
| 6  |                                                           | 6b  | Explanation for choice of comparators                                                                                                                                                                                                                                                                                                                                          | 5                                 |
| 7  |                                                           |     |                                                                                                                                                                                                                                                                                                                                                                                |                                   |
| 8  | Objectives                                                | 7   | Specific objectives or hypotheses                                                                                                                                                                                                                                                                                                                                              | 6                                 |
| 9  |                                                           |     |                                                                                                                                                                                                                                                                                                                                                                                |                                   |
| 10 | Trial design                                              | 8   | Description of trial design including type of trial (eg, parallel group, crossover, factorial, single group), allocation ratio, and framework (eg, superiority, equivalence, noninferiority, exploratory)                                                                                                                                                                      | 7                                 |
| 11 |                                                           |     |                                                                                                                                                                                                                                                                                                                                                                                |                                   |
| 12 |                                                           |     |                                                                                                                                                                                                                                                                                                                                                                                |                                   |
| 13 |                                                           |     |                                                                                                                                                                                                                                                                                                                                                                                |                                   |
| 14 |                                                           |     |                                                                                                                                                                                                                                                                                                                                                                                |                                   |
| 15 |                                                           |     |                                                                                                                                                                                                                                                                                                                                                                                |                                   |
| 16 | <b>Methods: Participants, interventions, and outcomes</b> |     |                                                                                                                                                                                                                                                                                                                                                                                |                                   |
| 17 |                                                           |     |                                                                                                                                                                                                                                                                                                                                                                                |                                   |
| 18 | Study setting                                             | 9   | Description of study settings (eg, community clinic, academic hospital) and list of countries where data will be collected. Reference to where list of study sites can be obtained                                                                                                                                                                                             | 7                                 |
| 19 |                                                           |     |                                                                                                                                                                                                                                                                                                                                                                                |                                   |
| 20 |                                                           |     |                                                                                                                                                                                                                                                                                                                                                                                |                                   |
| 21 |                                                           |     |                                                                                                                                                                                                                                                                                                                                                                                |                                   |
| 22 |                                                           |     |                                                                                                                                                                                                                                                                                                                                                                                |                                   |
| 23 | Eligibility criteria                                      | 10  | Inclusion and exclusion criteria for participants. If applicable, eligibility criteria for study centres and individuals who will perform the interventions (eg, surgeons, psychotherapists)                                                                                                                                                                                   | 7-9                               |
| 24 |                                                           |     |                                                                                                                                                                                                                                                                                                                                                                                |                                   |
| 25 |                                                           |     |                                                                                                                                                                                                                                                                                                                                                                                |                                   |
| 26 |                                                           |     |                                                                                                                                                                                                                                                                                                                                                                                |                                   |
| 27 | Interventions                                             | 11a | Interventions for each group with sufficient detail to allow replication, including how and when they will be administered                                                                                                                                                                                                                                                     | 10                                |
| 28 |                                                           |     |                                                                                                                                                                                                                                                                                                                                                                                |                                   |
| 29 |                                                           |     |                                                                                                                                                                                                                                                                                                                                                                                |                                   |
| 30 |                                                           | 11b | Criteria for discontinuing or modifying allocated interventions for a given trial participant (eg, drug dose change in response to harms, participant request, or improving/worsening disease)                                                                                                                                                                                 | In Protocol, not shown in article |
| 31 |                                                           |     |                                                                                                                                                                                                                                                                                                                                                                                |                                   |
| 32 |                                                           |     |                                                                                                                                                                                                                                                                                                                                                                                |                                   |
| 33 |                                                           |     |                                                                                                                                                                                                                                                                                                                                                                                |                                   |
| 34 |                                                           |     |                                                                                                                                                                                                                                                                                                                                                                                |                                   |
| 35 |                                                           |     |                                                                                                                                                                                                                                                                                                                                                                                |                                   |
| 36 |                                                           |     |                                                                                                                                                                                                                                                                                                                                                                                |                                   |
| 37 |                                                           | 11c | Strategies to improve adherence to intervention protocols, and any procedures for monitoring adherence (eg, drug tablet return, laboratory tests)                                                                                                                                                                                                                              | In Protocol, not shown in article |
| 38 |                                                           |     |                                                                                                                                                                                                                                                                                                                                                                                |                                   |
| 39 |                                                           |     |                                                                                                                                                                                                                                                                                                                                                                                |                                   |
| 40 |                                                           |     |                                                                                                                                                                                                                                                                                                                                                                                |                                   |
| 41 |                                                           |     |                                                                                                                                                                                                                                                                                                                                                                                |                                   |
| 42 |                                                           |     |                                                                                                                                                                                                                                                                                                                                                                                |                                   |
| 43 |                                                           |     |                                                                                                                                                                                                                                                                                                                                                                                |                                   |
| 44 |                                                           | 11d | Relevant concomitant care and interventions that are permitted or prohibited during the trial                                                                                                                                                                                                                                                                                  | In Protocol, not shown in article |
| 45 |                                                           |     |                                                                                                                                                                                                                                                                                                                                                                                |                                   |
| 46 |                                                           |     |                                                                                                                                                                                                                                                                                                                                                                                |                                   |
| 47 |                                                           |     |                                                                                                                                                                                                                                                                                                                                                                                |                                   |
| 48 |                                                           |     |                                                                                                                                                                                                                                                                                                                                                                                |                                   |
| 49 |                                                           |     |                                                                                                                                                                                                                                                                                                                                                                                |                                   |
| 50 |                                                           |     |                                                                                                                                                                                                                                                                                                                                                                                |                                   |
| 51 | Outcomes                                                  | 12  | Primary, secondary, and other outcomes, including the specific measurement variable (eg, systolic blood pressure), analysis metric (eg, change from baseline, final value, time to event), method of aggregation (eg, median, proportion), and time point for each outcome. Explanation of the clinical relevance of chosen efficacy and harm outcomes is strongly recommended | 10-11                             |
| 52 |                                                           |     |                                                                                                                                                                                                                                                                                                                                                                                |                                   |
| 53 |                                                           |     |                                                                                                                                                                                                                                                                                                                                                                                |                                   |
| 54 |                                                           |     |                                                                                                                                                                                                                                                                                                                                                                                |                                   |
| 55 |                                                           |     |                                                                                                                                                                                                                                                                                                                                                                                |                                   |
| 56 |                                                           |     |                                                                                                                                                                                                                                                                                                                                                                                |                                   |
| 57 |                                                           |     |                                                                                                                                                                                                                                                                                                                                                                                |                                   |
| 58 |                                                           |     |                                                                                                                                                                                                                                                                                                                                                                                |                                   |
| 59 |                                                           |     |                                                                                                                                                                                                                                                                                                                                                                                |                                   |
| 60 |                                                           |     |                                                                                                                                                                                                                                                                                                                                                                                |                                   |

|    |             |    |                                                                  |           |
|----|-------------|----|------------------------------------------------------------------|-----------|
| 1  |             |    |                                                                  |           |
| 2  | Participant | 13 | Time schedule of enrolment, interventions (including any run-ins | Figure    |
| 3  | timeline    |    | and washouts), assessments, and visits for participants. A       | 1         |
| 4  |             |    | schematic diagram is highly recommended (see Figure)             |           |
| 5  |             |    |                                                                  |           |
| 6  | Sample size | 14 | Estimated number of participants needed to achieve study         | 12        |
| 7  |             |    | objectives and how it was determined, including clinical and     |           |
| 8  |             |    | statistical assumptions supporting any sample size calculations  |           |
| 9  |             |    |                                                                  |           |
| 10 | Recruitment | 15 | Strategies for achieving adequate participant enrolment to reach | In        |
| 11 |             |    | target sample size                                               | Protocol, |
| 12 |             |    |                                                                  | not       |
| 13 |             |    |                                                                  | shown in  |
| 14 |             |    |                                                                  | article   |
| 15 |             |    |                                                                  |           |
| 16 |             |    |                                                                  |           |
| 17 |             |    |                                                                  |           |

### Methods: Assignment of interventions (for controlled trials)

#### Allocation:

|    |            |     |                                                                    |       |
|----|------------|-----|--------------------------------------------------------------------|-------|
| 21 |            |     |                                                                    |       |
| 22 | Sequence   | 16a | Method of generating the allocation sequence (eg, computer-        | 9-10  |
| 23 | generation |     | generated random numbers), and list of any factors for             |       |
| 24 |            |     | stratification. To reduce predictability of a random sequence,     |       |
| 25 |            |     | details of any planned restriction (eg, blocking) should be        |       |
| 26 |            |     | provided in a separate document that is unavailable to those who   |       |
| 27 |            |     | enrol participants or assign interventions                         |       |
| 28 |            |     |                                                                    |       |
| 29 |            |     |                                                                    |       |
| 30 | Allocation | 16b | Mechanism of implementing the allocation sequence (eg, central     | 9-10  |
| 31 | concealme  |     | telephone; sequentially numbered, opaque, sealed envelopes),       |       |
| 32 | nt         |     | describing any steps to conceal the sequence until interventions   |       |
| 33 | mechanism  |     | are assigned                                                       |       |
| 34 |            |     |                                                                    |       |
| 35 |            |     |                                                                    |       |
| 36 | Implement  | 16c | Who will generate the allocation sequence, who will enrol          | 9-10  |
| 37 | ation      |     | participants, and who will assign participants to interventions    |       |
| 38 |            |     |                                                                    |       |
| 39 | Blinding   | 17a | Who will be blinded after assignment to interventions (eg, trial   | 10-11 |
| 40 | (masking)  |     | participants, care providers, outcome assessors, data analysts),   |       |
| 41 |            |     | and how                                                            |       |
| 42 |            |     |                                                                    |       |
| 43 |            | 17b | If blinded, circumstances under which unblinding is permissible,   | NA    |
| 44 |            |     | and procedure for revealing a participant's allocated intervention |       |
| 45 |            |     | during the trial                                                   |       |
| 46 |            |     |                                                                    |       |
| 47 |            |     |                                                                    |       |

### Methods: Data collection, management, and analysis

|    |            |     |                                                                       |       |
|----|------------|-----|-----------------------------------------------------------------------|-------|
| 49 |            |     |                                                                       |       |
| 50 | Data       | 18a | Plans for assessment and collection of outcome, baseline, and         | 11-12 |
| 51 | collection |     | other trial data, including any related processes to promote data     |       |
| 52 | methods    |     | quality (eg, duplicate measurements, training of assessors) and a     |       |
| 53 |            |     | description of study instruments (eg, questionnaires, laboratory      |       |
| 54 |            |     | tests) along with their reliability and validity, if known. Reference |       |
| 55 |            |     | to where data collection forms can be found, if not in the protocol   |       |
| 56 |            |     |                                                                       |       |
| 57 |            |     |                                                                       |       |
| 58 |            |     |                                                                       |       |
| 59 |            |     |                                                                       |       |
| 60 |            |     |                                                                       |       |

|    |                                 |     |                                                                          |
|----|---------------------------------|-----|--------------------------------------------------------------------------|
| 1  |                                 |     |                                                                          |
| 2  |                                 | 18b | Plans to promote participant retention and complete follow-up, 11-12     |
| 3  |                                 |     | including list of any outcome data to be collected for participants      |
| 4  |                                 |     | who discontinue or deviate from intervention protocols                   |
| 5  |                                 |     |                                                                          |
| 6  | Data                            | 19  | Plans for data entry, coding, security, and storage, including any 11-12 |
| 7  | management                      |     | related processes to promote data quality (eg, double data entry;        |
| 8  |                                 |     | range checks for data values). Reference to where details of data        |
| 9  |                                 |     | management procedures can be found, if not in the protocol               |
| 10 |                                 |     |                                                                          |
| 11 |                                 |     |                                                                          |
| 12 | Statistical                     | 20a | Statistical methods for analysing primary and secondary 13               |
| 13 | methods                         |     | outcomes. Reference to where other details of the statistical            |
| 14 |                                 |     | analysis plan can be found, if not in the protocol                       |
| 15 |                                 |     |                                                                          |
| 16 |                                 | 20b | Methods for any additional analyses (eg, subgroup and adjusted 13        |
| 17 |                                 |     | analyses)                                                                |
| 18 |                                 |     |                                                                          |
| 19 |                                 | 20c | Definition of analysis population relating to protocol non- 13           |
| 20 |                                 |     | adherence (eg, as randomised analysis), and any statistical              |
| 21 |                                 |     | methods to handle missing data (eg, multiple imputation)                 |
| 22 |                                 |     |                                                                          |
| 23 |                                 |     |                                                                          |
| 24 | <b>Methods: Monitoring</b>      |     |                                                                          |
| 25 |                                 |     |                                                                          |
| 26 | Data                            | 21a | Composition of data monitoring committee (DMC); summary of its 12        |
| 27 | monitoring                      |     | role and reporting structure; statement of whether it is                 |
| 28 |                                 |     | independent from the sponsor and competing interests; and                |
| 29 |                                 |     | reference to where further details about its charter can be found,       |
| 30 |                                 |     | if not in the protocol. Alternatively, an explanation of why a DMC       |
| 31 |                                 |     | is not needed                                                            |
| 32 |                                 |     |                                                                          |
| 33 |                                 |     |                                                                          |
| 34 |                                 | 21b | Description of any interim analyses and stopping guidelines, NA          |
| 35 |                                 |     | including who will have access to these interim results and make         |
| 36 |                                 |     | the final decision to terminate the trial                                |
| 37 |                                 |     |                                                                          |
| 38 | Harms                           | 22  | Plans for collecting, assessing, reporting, and managing solicited 12    |
| 39 |                                 |     | and spontaneously reported adverse events and other                      |
| 40 |                                 |     | unintended effects of trial interventions or trial conduct               |
| 41 |                                 |     |                                                                          |
| 42 |                                 |     |                                                                          |
| 43 | Auditing                        | 23  | Frequency and procedures for auditing trial conduct, if any, and 12      |
| 44 |                                 |     | whether the process will be independent from investigators and           |
| 45 |                                 |     | the sponsor                                                              |
| 46 |                                 |     |                                                                          |
| 47 |                                 |     |                                                                          |
| 48 | <b>Ethics and dissemination</b> |     |                                                                          |
| 49 |                                 |     |                                                                          |
| 50 | Research                        | 24  | Plans for seeking research ethics committee/institutional review 3       |
| 51 | ethics                          |     | board (REC/IRB) approval                                                 |
| 52 | approval                        |     |                                                                          |
| 53 |                                 |     |                                                                          |
| 54 | Protocol                        | 25  | Plans for communicating important protocol modifications (eg, 3          |
| 55 | amendments                      |     | changes to eligibility criteria, outcomes, analyses) to relevant         |
| 56 |                                 |     | parties (eg, investigators, REC/IRBs, trial participants, trial          |
| 57 |                                 |     | registries, journals, regulators)                                        |
| 58 |                                 |     |                                                                          |
| 59 |                                 |     |                                                                          |
| 60 |                                 |     |                                                                          |

|    |                   |     |                                                                      |          |
|----|-------------------|-----|----------------------------------------------------------------------|----------|
| 1  |                   |     |                                                                      |          |
| 2  | Consent or        | 26a | Who will obtain informed consent or assent from potential trial      | 3        |
| 3  | assent            |     | participants or authorised surrogates, and how (see Item 32)         |          |
| 4  |                   |     |                                                                      |          |
| 5  |                   | 26b | Additional consent provisions for collection and use of participant  | NA       |
| 6  |                   |     | data and biological specimens in ancillary studies, if applicable    |          |
| 7  |                   |     |                                                                      |          |
| 8  | Confidentiality   | 27  | How personal information about potential and enrolled                | In       |
| 9  |                   |     | participants will be collected, shared, and maintained in order to   | protocol |
| 10 |                   |     | protect confidentiality before, during, and after the trial          | , not    |
| 11 |                   |     |                                                                      | shown in |
| 12 |                   |     |                                                                      | article  |
| 13 |                   |     |                                                                      |          |
| 14 |                   |     |                                                                      |          |
| 15 | Declaration of    | 28  | Financial and other competing interests for principal investigators  | 16       |
| 16 | interests         |     | for the overall trial and each study site                            |          |
| 17 |                   |     |                                                                      |          |
| 18 | Access to         | 29  | Statement of who will have access to the final trial dataset, and    | 16       |
| 19 | data              |     | disclosure of contractual agreements that limit such access for      |          |
| 20 |                   |     | investigators                                                        |          |
| 21 |                   |     |                                                                      |          |
| 22 |                   |     |                                                                      |          |
| 23 | Ancillary and     | 30  | Provisions, if any, for ancillary and post-trial care, and for       | In       |
| 24 | post-trial care   |     | compensation to those who suffer harm from trial participation       | protocol |
| 25 |                   |     |                                                                      | , not    |
| 26 |                   |     |                                                                      | shown in |
| 27 |                   |     |                                                                      | article  |
| 28 |                   |     |                                                                      |          |
| 29 |                   |     |                                                                      |          |
| 30 | Dissemination     | 31a | Plans for investigators and sponsor to communicate trial results     | See      |
| 31 | policy            |     | to participants, healthcare professionals, the public, and other     | consent  |
| 32 |                   |     | relevant groups (eg, via publication, reporting in results           | from     |
| 33 |                   |     | databases, or other data sharing arrangements), including any        |          |
| 34 |                   |     | publication restrictions                                             | 3        |
| 35 |                   |     |                                                                      |          |
| 36 |                   |     |                                                                      |          |
| 37 |                   | 31b | Authorship eligibility guidelines and any intended use of            | In       |
| 38 |                   |     | professional writers                                                 | protocol |
| 39 |                   |     |                                                                      | , not    |
| 40 |                   |     |                                                                      | shown in |
| 41 |                   |     |                                                                      | article  |
| 42 |                   |     |                                                                      |          |
| 43 |                   |     |                                                                      |          |
| 44 |                   | 31c | Plans, if any, for granting public access to the full protocol,      | NA       |
| 45 |                   |     | participant-level dataset, and statistical code                      |          |
| 46 |                   |     |                                                                      |          |
| 47 | <b>Appendices</b> |     |                                                                      |          |
| 48 |                   |     |                                                                      |          |
| 49 | Informed          | 32  | Model consent form and other related documentation given to          | We       |
| 50 | consent           |     | participants and authorised surrogates                               | provide  |
| 51 | materials         |     |                                                                      | a model  |
| 52 |                   |     |                                                                      | consent  |
| 53 |                   |     |                                                                      | from     |
| 54 |                   |     |                                                                      |          |
| 55 |                   |     |                                                                      |          |
| 56 | Biological        | 33  | Plans for collection, laboratory evaluation, and storage of          | NA       |
| 57 | specimens         |     | biological specimens for genetic or molecular analysis in the        |          |
| 58 |                   |     | current trial and for future use in ancillary studies, if applicable |          |
| 59 |                   |     |                                                                      |          |
| 60 |                   |     |                                                                      |          |

1 \*It is strongly recommended that this checklist be read in conjunction with the SPIRIT 2013  
2 Explanation & Elaboration for important clarification on the items. Amendments to the  
3 protocol should be tracked and dated. The SPIRIT checklist is copyrighted by the SPIRIT  
4 Group under the Creative Commons "[Attribution-NonCommercial-NoDerivs 3.0 Unported](#)"  
5 license.  
6  
7  
8  
9  
10  
11  
12  
13  
14  
15  
16  
17  
18  
19  
20  
21  
22  
23  
24  
25  
26  
27  
28  
29  
30  
31  
32  
33  
34  
35  
36  
37  
38  
39  
40  
41  
42  
43  
44  
45  
46  
47  
48  
49  
50  
51  
52  
53  
54  
55  
56  
57  
58  
59  
60

For peer review only



# BMJ Open

## Efficacy and Safety of Tirofiban in Patients with Acute Branch Atherosclerotic Disease(BAD)-Related Stroke (BRANT): Protocol for a Randomized Controlled Trial

|                                 |                                                                                                                                                                                                                                                                                                                                                                                                                                                                                   |
|---------------------------------|-----------------------------------------------------------------------------------------------------------------------------------------------------------------------------------------------------------------------------------------------------------------------------------------------------------------------------------------------------------------------------------------------------------------------------------------------------------------------------------|
| Journal:                        | <i>BMJ Open</i>                                                                                                                                                                                                                                                                                                                                                                                                                                                                   |
| Manuscript ID                   | bmjopen-2023-082141.R2                                                                                                                                                                                                                                                                                                                                                                                                                                                            |
| Article Type:                   | Protocol                                                                                                                                                                                                                                                                                                                                                                                                                                                                          |
| Date Submitted by the Author:   | 26-Mar-2024                                                                                                                                                                                                                                                                                                                                                                                                                                                                       |
| Complete List of Authors:       | Li, Shengde; Peking Union Medical College Hospital, dingding, zhang; peking union medical college hospital<br>Sha, Yuhui; Peking Union Medical College, Department of Neurology<br>yicheng, zhu; Peking Union Medical College Hospital, Neurology<br>Zhou, Lixin; Peking Union Medical College, Department of Neurology<br>Peng, Bin; Peking Union Medical College Hospital<br>Ni, Jun; Peking Union Medical College Hospital Department of Neurology,<br>Department of Neurology |
| <b>Primary Subject Heading</b>: | Neurology                                                                                                                                                                                                                                                                                                                                                                                                                                                                         |
| Secondary Subject Heading:      | Cardiovascular medicine                                                                                                                                                                                                                                                                                                                                                                                                                                                           |
| Keywords:                       | Stroke < NEUROLOGY, Prognosis, THERAPEUTICS                                                                                                                                                                                                                                                                                                                                                                                                                                       |
|                                 |                                                                                                                                                                                                                                                                                                                                                                                                                                                                                   |

SCHOLARONE™  
Manuscripts

1  
2  
3  
4 **Efficacy and Safety of Tirofiban in Patients with Acute Branch Atherosclerotic**  
5  
6 **Disease(BAD)-Related Stroke (BRANT): Protocol for a Randomized Controlled**  
7  
8  
9 **Trial**  
10

11 **Authors:** Shengde Li, MD;1 Dingding Zhang, PhD;2 Yuhui Sha, MD;1 Yicheng Zhu,  
12  
13  
14 MD;1 Lixin Zhou, MD;1 Bin Peng, MD;1 Jun Ni, MD.1  
15  
16

17  
18  
19 1 Department of Neurology, State Key Laboratory of Complex Severe and Rare  
20 Diseases, Peking Union Medical College Hospital, Chinese Academy of Medical  
21 Science and Peking Union Medical College, Beijing, China.  
22  
23  
24

25  
26  
27 2 Medical Research Center, State Key laboratory of Complex Severe and Rare Diseases,  
28 Peking Union Medical College Hospital, Chinese Academy of Medical Sciences and  
29 Peking Union Medical College, Beijing, China.  
30  
31  
32  
33

34  
35 **Corresponding author:**  
36

37 Jun Ni, MD  
38

39  
40 Department of Neurology, Peking Union Medical College Hospital, Beijing, China.  
41

42  
43 Department of Neurology, Peking Union Medical College Hospital, Shuaifuyuan1,  
44  
45 Dong Cheng District, Beijing, 100730, China  
46

47  
48 Phone: +86 10 69156371  
49

50  
51 Fax: +86 10 69156371  
52

53  
54 E-mail: pumchnijun@163.com  
55

56 **Total word count: 4102**  
57  
58  
59  
60

## Abstract

**Introduction:** Branch atheromatous disease (BAD)-related stroke is increasingly becoming a clinical entity and prone to early neurological deterioration (END) and poor prognosis. There are no effective regimens to reduce the disability caused by BAD-related stroke in acute phase. Recent studies have indicated the efficacy of tirofiban in acute ischemic stroke, however, its efficacy has not been validated in patients with BAD-related stroke. Thus, we aim to test whether intravenous tirofiban initiated within 48 hours after onset would safely improve the functional outcome in patients with acute BAD-related stroke, in comparison with standard antiplatelet therapy based on the current guideline.

**Methods and analysis:** BRANT is a multicenter, randomized, open-label, blinded endpoint, parallel-controlled, phase III trial conducted in 21 hospitals in China. Participants aged 18-75 years with acute BAD-related stroke within 48 h after stroke onset are randomized in a 1:1 ratio to the tirofiban or control group. The treatment period is 48 hours in both groups. The primary outcome is the excellent functional outcome (modified Rankin Scale score: 0-1) at 90 days. The secondary outcomes include END, major bleeding, stroke, death, functional status, serious adverse events, and change in bleeding-related markers. Assuming the rates of the primary outcome to be 74% in the tirofiban group and 62% in the control group, a total of 516 participants are needed for 0.8 power (two-sided 0.05 alpha).

**Ethics and dissemination:** BRANT study has been approved by the Ethics Committee of the Peking Union Medical College Hospital (I-23PJ1242). Written informed consent

1  
2  
3  
4 is required for all patients before enrollment. The results of the study will be published  
5  
6 in a peer-reviewed journal.  
7

8  
9 **Trial registration number** ClinicalTrials.gov (NCT06037889)  
10

11 **Keywords:** Branch Atheromatous Disease, Acute ischemic stroke, Early neurological  
12  
13 deterioration, Functional outcome, Tirofiban, Treatment  
14  
15  
16  
17  
18  
19  
20  
21  
22  
23  
24  
25  
26  
27  
28  
29  
30  
31  
32  
33  
34  
35  
36  
37  
38  
39  
40  
41  
42  
43  
44  
45  
46  
47  
48  
49  
50  
51  
52  
53  
54  
55  
56  
57  
58  
59  
60

For peer review only

### Strengths and limitations of this study

1. With the aid of magnetic resonance imaging, this study focuses on patients with acute BAD-related stroke, which had been inappropriately classified as small-vessel occlusion or an undetermined aetiology by the TOAST system in previous studies.
2. Intervention will be initiated within 48 hours of onset, which is more in line with the timeliness of BAD treatment.
3. Lack of double-blinded design is a limitation, but the endpoints are measured in a blinded manner.

## Introduction

Branch atheromatous disease (BAD), first described conceptually by Caplan in 1989, is being confirmed as a clinical entity with the aid of advanced neuroimaging.[1-3] BAD-related stroke, characterized by subcortical single infarcts in penetrating artery territories without severe stenosis of the large parent artery, accounts for 20.4% of all ischaemic stroke cases in Asian populations[2 4]. Differing from lacunar infarct due to lipohyalinosis, BAD-related stroke is caused by parent arterial plaque occlusion of the perforating orifice or proximal atherosclerotic occlusion of the perforating artery[1-3], which could be identified from small-vessel occlusion or stroke of undetermined source in the Trial Org 10172 in Acute Stroke Treatment (TOAST) system[5 6].

High incidence of early neurological deterioration (END) has been observed in BAD-related stroke and is strongly associated with poor prognosis[7 8]. The rate of END is higher in BAD-related stroke than lacunar infarct (26.8-37.5% vs. 6.3-18.6%), and thrombolysis itself cannot prevent the occurrence of END[7-9]. In addition, it remains unclear whether intravenous thrombolysis could improve the clinical outcome in BAD-related stroke[10]. The rate of disability can reach 61%[2]. However, there are no high-level recommendations for acute-phase treatment of BAD-related stroke, and no Randomized Controlled Trial (RCT) has examined BAD as a separate disease. Current practice—based on limited observational data and expert opinion—is heterogeneous, including anticoagulant and mono/dual antiplatelet therapy, the efficacy of which is uncertain for BAD-related stroke[11 12].

Tirofiban, a selective and reversible antagonist of glycoprotein IIb/IIIa inhibitors on

1  
2  
3  
4 platelets, might be more effective than conventional agents (such as aspirin or  
5  
6 clopidogrel) by blocking the final common pathway of platelet aggregation at the  
7  
8 pathophysiological level[13]. In clinical studies, historical evidence has also reported  
9  
10 that tirofiban increases the recanalization rate and improves functional prognosis in  
11  
12 stroke patients with endovascular therapy without increasing bleeding risk[14-16]. A  
13  
14 large randomized trial of patients with stroke without large or medium-sized vessel  
15  
16 occlusion also reported the efficacy of tirofiban[17]. However, though an  
17  
18 atherosclerotic mechanism is presumed to exist between BAD and large artery  
19  
20 atherosclerosis, this evidence may not be generalized to BAD-related stroke, as  
21  
22 retrospective data or small samples may introduce selection bias[14 18]. Moreover,  
23  
24 about 78.6%-90.9% of END occurs within 48 h after onset[19 20]. Our preliminary  
25  
26 results of a cohort with BAD-related stroke found that the median time from onset to  
27  
28 END was 38 h. We hypothesised that early tirofiban administration could improve  
29  
30 functional prognosis by preventing the occurrence of END. However, tirofiban was  
31  
32 often prescribed after END in previous studies, which might cause irreversible ischemic  
33  
34 lesions and neurologic deficits[14 17]. Thus, randomised controlled trials of acute  
35  
36 BAD-related stroke are needed and have been requested by researchers[3 4]. In addition,  
37  
38 we speculated that tirofiban should be initiated within 48 h after onset to prevent the  
39  
40 occurrence of END.  
41  
42  
43  
44  
45  
46  
47  
48  
49  
50  
51

52  
53 The BRANT trial aims to establish the efficacy and safety of intravenous tirofiban for  
54  
55 improving functional outcome in patients with acute BAD-related stroke.  
56  
57  
58  
59  
60

## Methods

### Design

This is a multicenter, randomized, open-label, blinded-endpoint, parallel-controlled phase III trial. The BRANT study began enrolment on November 9, 2023, and the anticipated date of study completion is October 31, 2025.

### Patient population

BRANT will enroll 516 participants with BAD-related stroke within 48 hours of onset, from 21 centers in China.

### Inclusion criteria

- Age: 18-75 years old [21 22]
- Acute ischemic stroke
- Time from onset to randomization  $\leq 48\text{h}$ ; if onset time is unknown, time from last known well to randomization  $\leq 48\text{h}$
- Meet the following BAD Diagnostic Imaging Criteria
  1. Diffusion Weighted Imaging (DWI) infarcts: single (isolated) deep (subcortical) infarcts;
  2. The culprit arteries are either lenticulostriate artery (LSA) or paramedian pontine artery (PPA), and the infarct lesion on DWI conforms to one of the following characteristics (A/B):
    - A. LSA: “Comma-like” infarct lesions with “fan-shaped” extension from bottom to top in the coronary position; or  $\geq 3$  layers (layer thickness 5–7 mm) on axial DWI brain images;



1  
2  
3  
4 B. PPA: The infarct lesion extends from the deep pons to the ventral pons on  
5  
6 the axial DWI brain images;

- 7  
8  
9 ● No more than 50% stenosis on the parent artery of the criminal artery (i.e.  
10  
11 corresponding basilar or middle cerebral artery) (Confirmed by magnetic  
12  
13 resonance angiography[MRA]/ computed tomography angiography [CTA]/  
14  
15 digital subtraction angiography [DSA])  
16  
17  
18 ● Signed informed consent by the patient or legally authorized representatives.  
19  
20  
21

### 22 **Exclusion criteria**

- 23  
24 ● Transient ischemic attack (TIA)  
25  
26  
27 ● Intracranial hemorrhagic diseases, vascular malformations, aneurysms, brain  
28  
29 abscesses, malignant space-occupying lesions, or other non- ischemic  
30  
31 intracranial lesions detected by baseline computed tomography(CT)/ magnetic  
32  
33 resonance imaging (MRI), or MRA/CTA/ DSA  
34  
35  
36 ● Presence of  $\geq 50\%$  stenosis in extracranial artery in tandem relationship  
37  
38 ipsilateral to the lesion  
39  
40  
41  
42 ● Cardiogenic embolism: atrial fibrillation, myocardial infarction, heart valve  
43  
44 disease, dilated cardiomyopathy, infective endocarditis, atrioventricular block  
45  
46 disease, heart rate less than 50 beats per minute  
47  
48  
49  
50 ● Have received or plan to receive endovascular therapy or thrombolysis after  
51  
52 onset  
53  
54  
55 ● Stroke of other clear causes, e.g., moyamoya disease, arterial entrapment,  
56  
57 vasculitis, etc.  
58  
59  
60

- modified Rankin Scale score  $\geq 2$  before onset
- Use of tirofiban within 1 week before or after onset
- Low platelets ( $<100 \times 10^9/L$ ), or prothrombin time  $>1.3$  times of the upper normal limit, or international normalised ratio (INR)  $>1.5$ , or other systemic hemorrhagic tendencies such as hematologic disorders
- Elevation of alanine aminotransferase (ALT) or aspartate aminotransferase (AST) more than 1.5 times the upper normal limit
- Glomerular filtration rate  $<60$  mL/min/1.73m<sup>2</sup>
- Known malignant tumors
- History of trauma or major surgical intervention within 6 weeks prior to onset
- History of intracranial hemorrhage
- Active or recent history (within 30 days prior to onset) of clinical bleeding (e.g., gastrointestinal bleeding)
- Malignant hypertension (systolic blood pressure  $>200$  mmHg, or diastolic blood pressure  $>120$  mmHg)
- Life expectancy  $\leq 6$  months
- Contraindications of 3 T MRI examination
- Pregnant or lactating women
- Have participated in another clinical trial within 3 months prior to the date of informed consent or are participating in another clinical trial

## Randomization

1  
2  
3  
4 Participants will be randomized in a 1:1 ratio using a dynamic block randomization  
5  
6 method via an independent central website. The block sizes were set to 6, 8, and 12.  
7  
8  
9 The allocation sequence is stored on the central website and the participant will be  
10  
11 assigned to the intervention or control group in a 1:1 ratio according to the order of  
12  
13 enrolment.  
14  
15

### 16 17 18 19 **Intervention**

20  
21  
22 Tirofiban group: Intravenous tirofiban will be administered immediately after  
23  
24 randomization for a total duration of 48 hours with a loading dose of 0.4µg  
25  
26 /kg/min×30min, followed by a maintenance dose of 0.1µg /kg/min×47.5h (Figure1).  
27  
28

29  
30 Control group: Standard antiplatelet therapy based on Chinese stroke guideline will be  
31  
32 initiated after randomization for a total duration of 48 hours, as the two following types:  
33  
34 (1) aspirin 150-300 mg qd, or (2) aspirin 100 mg qd plus clopidogrel 75 mg qd.[23] Its  
35  
36 initiation will be determined based on the last administration time of antithrombotic  
37  
38 drugs; however, the drug should be administered as soon as possible.  
39  
40

41  
42 After a 48-hour treatment period in both groups, the standard of care, including an  
43  
44 antithrombotic regimen, will be performed based on current guidelines and recorded in  
45  
46 detail (Figure 1).  
47  
48

### 49 50 **Primary outcomes**

51  
52 The primary outcome is excellent functional outcome at 90 days, defined as modified  
53  
54 Rankin Scale score of 0-1[24]. Primary outcome will be measured by the qualified  
55  
56 evaluators who are blinded to all procedures.  
57  
58  
59  
60

## Secondary outcomes

Secondary efficacy outcomes include END, National Institutes of Health Stroke Scale (NIHSS) score, Barthel index score, ischemic stroke, stroke, TIA, and a composite event of new-onset stroke, myocardial infarction, and all-cause death. Excellent functional outcome at 7 days is also listed as a secondary efficacy outcome. Safety outcomes include the proportion of major bleeding as defined by the PLATO criteria, adverse events, all-cause death, and changes in bleeding-related markers[25]. The evaluators will not be aware of the treatment assignment after randomization. All the clinical and safety events will be re-examined by the independent Clinical Event Committee (CEC), who will be blinded during all procedures.

Considering the predictive value of END, we adopted the widely used and conservative definition of END for the BRANT study[26]. The presence of END is determined by an increase of  $\geq 4$  points in the NIHSS or an increase of  $\geq 2$  points in the NIHSS motor score. The NIHSS motor score refers to bilateral upper and lower extremity mobility scores. The baseline NIHSS score for the calculation of END is the first clinician evaluated and recorded NIHSS score after onset. The time frame for post-randomisation END is within 7 days of randomization.

## Study protocol and data management

A study flowchart is shown in Figure 1 and Table S1. At visit 1, trained investigators will recruit patients based on screening age, onset time, MRI, and other enrolment criteria (i.e. intracranial artery and electrocardiogram). The investigator will then

1  
2  
3  
4 explain the BRANT study to the patient in detail, including the contents of each visit  
5  
6 and the interventions. After obtaining written informed consent, the participants will be  
7  
8 assigned to the tirofiban or control groups via a central website-based randomization  
9  
10 system. Patients are encouraged to undergo on-site follow-up at 90 days. Demographic,  
11  
12 clinical, radiological, laboratory, and clinical event data at each visit (Table S1) will be  
13  
14 collected and stored in an electronic case report form (CRF) via a secure website. All  
15  
16 CRFs will be checked by local investigators for completeness and correction prior to  
17  
18 data entry. The data will be checked dynamically by the principal investigator (Jun Ni)  
19  
20 with the aid of research assistants.  
21  
22  
23  
24  
25  
26  
27  
28  
29

### 30 **Data Monitoring Board**

31  
32 An independent Data Security Monitoring Board (DSMB), including academic experts  
33  
34 and statisticians, has been established to protect the interests of the participants during  
35  
36 the study. The DSMB will review the overall implementation of the clinical study and  
37  
38 regularly and dynamically assess the risks and benefits, particularly unexpected adverse  
39  
40 events. The DSMB reports to the Executive Committee and provides professional  
41  
42 advice.  
43  
44  
45  
46  
47  
48  
49

### 50 **Sample size estimates**

51  
52 Based on previous studies and clinical practice, we assumed the rates of the primary  
53  
54 outcome to be 62% and 74% in the control and tirofiban groups, respectively[2 14-16  
55  
56  
57  
58  
59  
60

1  
2  
3  
4 18 27-29]. Thus, 234 participants per arm are needed for a two-sided test at alpha 0.05  
5  
6 and power 0.8. Considering a dropout rate of 10%, 516 patients will be required.  
7  
8  
9

## 10 11 **Statistical analyses**

12  
13  
14 According to the principle of intention-to-treat analysis, all participants who are  
15  
16 randomized into groups with more than one efficacy evaluation will be included in the  
17  
18 full analysis set. The estimation of missing values will be conducted by the carry-over  
19  
20 based on last observation carried forward (LOCF) estimation method. The proportion  
21  
22 of excellent outcomes at 90 days will be compared using the chi-square tests, and shown  
23  
24 as frequency (percentage). Most secondary outcome analyses will also use the primary  
25  
26 outcome analysis strategy. Survival data will be calculated using the Kaplan-Meier  
27  
28 method to estimate the survival rate in each group, and efficacy will be assessed using  
29  
30 the log-rank test. Hazard ratios (HRs) and 95% confidence intervals (CI) will be  
31  
32 calculated using the Cox proportional hazards model. Non-survival data will be  
33  
34 analysed using the chi-square test, and odds ratios and 95% CIs will be calculated.  
35  
36 Continuous variables will be compared between the two groups using the Student's t-  
37  
38 test or Wilcoxon rank-sum test. The influence of covariables will be evaluated using  
39  
40 subgroup analysis. No interim analysis is planned in this trial. All analyses will be  
41  
42 performed using SAS 9.4, and a two-sided  $P < 0.05$  is considered significant.  
43  
44  
45  
46  
47  
48  
49  
50  
51  
52  
53  
54  
55

## 56 **Patient and public involvement statement**

57  
58 None.  
59  
60

1  
2  
3  
4  
5  
6  
7 **Ethics and dissemination:** The BRANT study was approved by the Ethics Committee  
8  
9 of Peking Union Medical College Hospital (I-23PJ1242) on July 20, 2023. Written  
10  
11 informed consent is required from all patients before enrolment. BRANT will be carried  
12  
13 out according to Good Clinical Practice and the Declaration of Helsinki. Protocol  
14  
15 amendments will be reported to the institutional ethics committee. The trial sponsor is  
16  
17 Peking Union Medical College Hospital. The trial results will be published in a peer-  
18  
19 reviewed journal.  
20  
21  
22  
23  
24  
25  
26

## 27 **Discussion**

28  
29 The BRANT trial is a multicentre RCT that addresses the important treatment dilemma  
30  
31 of improving the functional outcomes of BAD-related stroke.  
32  
33

34  
35 BAD was first proposed by Caplan in 1989 to be distinct from lacunar infarct[1].  
36  
37 However, in the past three decades, most clinical studies have classified BAD as small-  
38  
39 vessel occlusion or undetermined etiology based on the TOAST system[4 30]. Few  
40  
41 studies focused on acute BAD-related stroke, probably due to discrepant definitions[3].  
42  
43 Recently, an increasing number of observational studies found distinct clinical,  
44  
45 radiologic, and prognostic features that patients with BAD-related stroke are prone to  
46  
47 END and poor prognosis[2 31].  
48  
49  
50  
51

52  
53 Owing to the limitations of neuroimaging techniques, the perforating artery, such as the  
54  
55 LSA or PPA, cannot be directly visualized. Radiological diagnosis is based on the  
56  
57 vascular territory, dimension, or shape of the lesion[3 32], which results in a huge  
58  
59  
60

1  
2  
3  
4 variations among BAD definitions. With the aid of neuroimaging and clinical practice,  
5  
6 Asian neurologists proposed radiological diagnosis criteria for BAD[33 34]. Our  
7  
8 previous study also found that  $\geq 4$  consecutive slices on axial view are more effective  
9  
10 than transversal diameter to differentiate atherosclerotic mechanisms of single  
11  
12 subcortical infarction in the LSA territory[35]. Considering the generalisation and  
13  
14 diagnostic accuracy of our study, we used  $\geq 3$  consecutive layers on axial DWI series  
15  
16 instead of lesion diameter to define BAD-related stroke in the LSA territory[36].  
17  
18 Because obtaining direct evidence of the LSA and PPA is currently not technically  
19  
20 feasible, our inclusion criteria based on MRI show considerable accuracy and  
21  
22 representativeness.  
23  
24

25  
26 In addition, our study uses simplified operationalised criteria to exclude cardiogenic  
27  
28 embolism, and patients with these comorbidities will not be included. Some conditions  
29  
30 seem general, which is a limitation of our study; however, this facilitates the  
31  
32 researcher's ability to complete screening within a limited timeframe with low  
33  
34 inconsistency.  
35  
36

37  
38 We set a 90-day excellent outcome instead of END or new-onset stroke as the primary  
39  
40 outcome for the following reasons: (1) historical evidence indicated that tirofiban  
41  
42 improved the functional outcome of ischemic stroke[14 17]; (2) END is an intermediate  
43  
44 indicators[7]; (3) the 90-day rate of recurrent stroke is 1.8% in our preliminary analysis  
45  
46 of a BAD-related stroke cohort and probably less than 3.8% in other cohorts[31], which  
47  
48 is relatively low. Thus, the BRANT study will provide direct evidence on how to reduce  
49  
50 disability caused by BAD, which is the major challenge in current clinical practice.  
51  
52  
53  
54  
55  
56  
57  
58  
59  
60



1  
2  
3  
4 As oral mono antiplatelet therapy is unethical and against Chinese stroke guidelines for  
5  
6 patients with NIHSS  $\leq 3$ , there are two types of antiplatelet therapy in the control  
7  
8 group[23]. A double-blind design would markedly increase the complexity of the trial  
9  
10 procedure. Therefore, we selected a prospective randomized open blinded end-point  
11  
12 design (PROBE) for BRANT. Independent senior neurologists who will be blinded to  
13  
14 the procedure information have been trained to evaluate the primary outcome. An  
15  
16 independent CEC has been established to centrally re-examine all clinical events after  
17  
18 randomization. Some local investigators may know the treatment allocation; however,  
19  
20 all evaluators of the subjective indicators will be blinded to the treatment allocation.  
21  
22  
23  
24  
25  
26  
27  
28  
29

30 **Contributors:** Shengde Li, and Jun Ni designed the study. Shengde Li drafted the  
31  
32 manuscript. Dingding Zhang designed the statistical method. Yuhui Sha, Lixin Zhou,  
33  
34 Yicheng Zhu, and Bin Peng critically revised the study protocol and the manuscript.  
35  
36 The entire project will be supervised by Jun Ni.  
37  
38  
39

40 **Funding:** This study is funded by the National High Level Hospital Clinical Research  
41  
42 Funding (2022-PUMCH-D-007).  
43  
44

45 **Disclaimer:** The funder has no role in this study.  
46  
47

48 **Competing interests:** None declared.  
49  
50

#### 51 **Data Availability Statement**

52  
53 The data that support the findings of this study are available from the corresponding  
54  
55 author on reasonable request.  
56  
57  
58  
59  
60

**References:**

1. Caplan LR. Intracranial branch atheromatous disease: a neglected, understudied, and underused concept. *Neurology* 1989;39(9):1246-50.
2. Kwan MW, Mak W, Cheung RT, et al. Ischemic stroke related to intracranial branch atheromatous disease and comparison with large and small artery diseases. *Journal of the neurological sciences* 2011;303(1-2):80-4.
3. Petrone L, Nannoni S, Del Bene A, et al. Branch Atheromatous Disease: A Clinically Meaningful, Yet Unproven Concept. *Cerebrovascular diseases (Basel, Switzerland)* 2016;41(1-2):87-95.
4. Kim BJ, Kim JS. Ischemic stroke subtype classification: an asian viewpoint. *Journal of stroke* 2014;16(1):8-17.
5. Uchiyama S, Toyoda K, Kitagawa K, et al. Branch atheromatous disease diagnosed as embolic stroke of undetermined source: A sub-analysis of NAVIGATE ESUS. *International journal of stroke : official journal of the International Stroke Society* 2019;14(9):915-22.
6. Wen L, Feng J, Zheng D. Heterogeneity of single small subcortical infarction can be reflected in lesion location. *Neurological sciences : official journal of the Italian Neurological Society and of the Italian Society of Clinical Neurophysiology* 2013;34(7):1109-16.
7. Duan Z, Fu C, Chen B, et al. Lesion patterns of single small subcortical infarct and its association with early neurological deterioration. *Neurological sciences : official journal of the Italian Neurological Society and of the Italian Society of Clinical Neurophysiology* 2015;36(10):1851-7.
8. Jeong HG, Kim BJ, Yang MH, et al. Neuroimaging markers for early neurologic deterioration in single small subcortical infarction. *Stroke* 2015;46(3):687-91.
9. Park MG, Oh EH, Kim BK, et al. Intravenous tissue plasminogen activator in acute branch atheromatous disease: Does it prevent early neurological deterioration? *Journal of clinical neuroscience : official journal of the Neurosurgical Society of Australasia* 2016;33:194-97.

10. Wu X, Liu Y, Nie C, et al. Efficacy and Safety of Intravenous Thrombolysis on Acute Branch Atheromatous Disease: A Retrospective Case-Control Study. *Frontiers in neurology* 2020;11:581.
11. Wang Q, Chen C, Chen XY, et al. Low-molecular-weight heparin and early neurologic deterioration in acute stroke caused by large artery occlusive disease. *Archives of neurology* 2012;69(11):1454-60.
12. Yi X, Zhou Q, Wang C, et al. Aspirin plus clopidogrel may reduce the risk of early neurologic deterioration in ischemic stroke patients carrying CYP2C19\*2 reduced-function alleles. *Journal of neurology* 2018;265(10):2396-403.
13. Schwarz M, Meade G, Stoll P, et al. Conformation-specific blockade of the integrin GPIIb/IIIa: a novel antiplatelet strategy that selectively targets activated platelets. *Circulation research* 2006;99(1):25-33.
14. Wu C, Sun C, Wang L, et al. Low-Dose Tirofiban Treatment Improves Neurological Deterioration Outcome After Intravenous Thrombolysis. *Stroke* 2019;50(12):3481-87.
15. Pan X, Zheng D, Zheng Y, et al. Safety and efficacy of tirofiban combined with endovascular treatment in acute ischaemic stroke. *European journal of neurology* 2019;26(8):1105-10.
16. Yang J, Wu Y, Gao X, et al. Intraarterial Versus Intravenous Tirofiban as an Adjunct to Endovascular Thrombectomy for Acute Ischemic Stroke. *Stroke* 2020;51(10):2925-33.
17. Zi W, Song J, Kong W, et al. Tirofiban for Stroke without Large or Medium-Sized Vessel Occlusion. *The New England journal of medicine* 2023;388(22):2025-36.
18. Liu B, Zhang H, Wang R, et al. Early administration of tirofiban after urokinase-mediated intravenous thrombolysis reduces early neurological deterioration in patients with branch atheromatous disease. *The Journal of international medical research* 2020;48(5):300060520926298.
19. Audebert HJ, Pellkofer TS, Wimmer ML, et al. Progression in lacunar stroke is related to elevated acute phase parameters. *European neurology*

- 2004;51(3):125-31.
20. Kim YS, Lee KY, Koh SH, et al. The role of matrix metalloproteinase 9 in early neurological worsening of acute lacunar infarction. *European neurology* 2006;55(1):11-5.
21. Januzzi JL, Jr., Sabatine MS, Wan Y, et al. Interactions between age, outcome of acute coronary syndromes, and tirofiban therapy. *The American journal of cardiology* 2003;91(4):457-61.
22. Li L, Geraghty OC, Mehta Z, et al. Age-specific risks, severity, time course, and outcome of bleeding on long-term antiplatelet treatment after vascular events: a population-based cohort study. *Lancet (London, England)* 2017;390(10093):490-99.
23. Chinese Society of Neurology, Cerebrovascular disease group of Chinese Society of Neurology. Chinese guidelines for diagnosis and treatment of acute ischemic stroke 2018. *Chin J Neurol.* 2018;51 9:666-682
24. van Swieten JC, Koudstaal PJ, Visser MC, et al. Interobserver agreement for the assessment of handicap in stroke patients. *Stroke* 1988;19(5):604-7.
25. Wallentin L, Becker RC, Budaj A, et al. Ticagrelor versus clopidogrel in patients with acute coronary syndromes. *The New England journal of medicine* 2009;361(11):1045-57.
26. Seners P, Turc G, Oppenheim C, et al. Incidence, causes and predictors of neurological deterioration occurring within 24 h following acute ischaemic stroke: a systematic review with pathophysiological implications. *Journal of neurology, neurosurgery, and psychiatry* 2015;86(1):87-94.
27. Wang H, Li X, Liu C, et al. Effects of Oral Antiplatelet Agents and Tirofiban on Functional Outcomes of Patients with Non-Disabling Minor Acute Ischemic Stroke. *Journal of stroke and cerebrovascular diseases : the official journal of National Stroke Association* 2020;29(8):104829.
28. Lin J, Han Z, Wang C, et al. Dual therapy with clopidogrel and aspirin prevents early neurological deterioration in ischemic stroke patients carrying CYP2C19\*2 reduced-function alleles. *Eur J Clin Pharmacol* 2018;74(9):1131-

- 1  
2  
3  
4 40.  
5  
6 29. Albers GW, Marks MP, Kemp S, et al. Thrombectomy for Stroke at 6 to 16 Hours  
7 with Selection by Perfusion Imaging. *The New England journal of medicine*  
8 2018;378(8):708-18.  
9  
10  
11 30. Uchiyama S, Toyoda K, Kitagawa K, et al. Branch atheromatous disease diagnosed  
12 as embolic stroke of undetermined source: A sub-analysis of NAVIGATE  
13 ESUS. *International journal of stroke : official journal of the International*  
14 *Stroke Society* 2019;14(9):915-22.  
15  
16  
17 31. Zhang C, Wang Y, Zhao X, et al. Distal single subcortical infarction had a better  
18 clinical outcome compared with proximal single subcortical infarction. *Stroke*  
19 2014;45(9):2613-9.  
20  
21  
22 32. Yamamoto Y, Ohara T, Hamanaka M, et al. Characteristics of intracranial branch  
23 atheromatous disease and its association with progressive motor deficits.  
24 *Journal of the neurological sciences* 2011;304(1-2):78-82.  
25  
26  
27 33. Adachi T, Takagi M. The clinical differences between lacunar infarction and branch  
28 atheromatous disease. *Nihon rinsho Japanese journal of clinical medicine*  
29 2006;64 Suppl 8:155-9.  
30  
31  
32 34. Zhou LX, Ni J. Advances in Branch Atheromatous Disease. *Chinese Stroke Journal*  
33 2020;15:1342- 1351.  
34  
35  
36 35. Cao Y, Zhang M, Zhou L, et al. Consecutive Slides on Axial View Is More Effective  
37 Than Transversal Diameter to Differentiate Mechanisms of Single Subcortical  
38 Infarctions in the Lenticulostriate Artery Territory. *Frontiers in neurology*  
39 2019;10:336.  
40  
41  
42 36. Investigators SPS, Benavente OR, Hart RG, et al. Effects of clopidogrel added to  
43 aspirin in patients with recent lacunar stroke. *The New England journal of*  
44 *medicine* 2012;367(9):817-25.  
45  
46  
47  
48  
49  
50  
51  
52  
53  
54  
55  
56  
57  
58  
59  
60

1  
2  
3  
4  
5  
6  
7  
8  
9  
10  
11  
12  
13  
14  
15  
16  
17  
18  
19  
20  
21  
22  
23  
24  
25  
26  
27  
28  
29  
30  
31  
32  
33  
34  
35  
36  
37  
38  
39  
40  
41  
42  
43  
44  
45  
46  
47  
48  
49  
50  
51  
52  
53  
54  
55  
56  
57  
58  
59  
60

**Figure I. Study Flow**

For peer review only



Figure 1. Study Flow

338x190mm (54 x 54 DPI)

## Supplementary materials

**Table S1. Study Procedure of BRANT trial**

| Measurement                                  | Day 1 | Day 2 | Day 3 | Day 7 | Day 90 |
|----------------------------------------------|-------|-------|-------|-------|--------|
| Demographic characteristics                  | X     |       |       |       |        |
| Current medical history taking               | X     |       |       |       |        |
| Body temperature measurement                 | X     |       |       |       |        |
| Physical examination                         | X     |       |       | X     | X      |
| Past medical history                         | X     |       |       |       |        |
| Pre-randomization medication after onset     | X     |       |       |       |        |
| Regular blood pressure monitoring            | X     | X     |       |       |        |
| NIHSS score                                  | X     |       |       | X     | X      |
| mRS score                                    | X     |       |       | X     | X      |
| Barthel index score                          | X     |       |       |       | X      |
| Magnetic resonance image                     | X     |       |       |       |        |
| Evaluation of Intracranial vessels           | X     |       |       |       |        |
| Evaluation of extracranial vessels           | X     |       |       |       |        |
| Laboratory tests*                            | X     |       |       |       |        |
| ECG*                                         | X     |       |       | X     |        |
| Verification of inclusion/exclusion criteria | X     |       |       |       |        |
| Signed informed consent                      | X     |       |       |       |        |
| Randomization                                | X     |       |       |       |        |
| Blood tests after enrollment                 |       | X     | X     |       |        |



|                                                                                                                                                 |  |  |          |          |          |
|-------------------------------------------------------------------------------------------------------------------------------------------------|--|--|----------|----------|----------|
| Urine and fecal examination                                                                                                                     |  |  | <b>X</b> |          |          |
| Compliance                                                                                                                                      |  |  | <b>X</b> |          |          |
| Concomitant medication                                                                                                                          |  |  |          | <b>X</b> | <b>X</b> |
| Early neurological deterioration                                                                                                                |  |  |          | <b>X</b> |          |
| Major bleeding                                                                                                                                  |  |  |          | <b>X</b> | <b>X</b> |
| Adverse Events/ Serious Adverse Events                                                                                                          |  |  |          | <b>X</b> | <b>X</b> |
| <p>*Remarks: ECG and laboratory data performed within 48 hours of onset before signing the informed consent form can be used as trial data.</p> |  |  |          |          |          |



SPIRIT 2013 Checklist: Recommended items to address in a clinical trial protocol and related documents\*

| Section/item                      | Item No | Description                                                                                                                                                                                                                                                                              | Page                              |
|-----------------------------------|---------|------------------------------------------------------------------------------------------------------------------------------------------------------------------------------------------------------------------------------------------------------------------------------------------|-----------------------------------|
| <b>Administrative information</b> |         |                                                                                                                                                                                                                                                                                          |                                   |
| Title                             | 1       | Descriptive title identifying the study design, population, interventions, and, if applicable, trial acronym                                                                                                                                                                             | 1                                 |
| Trial registration                | 2a      | Trial identifier and registry name. If not yet registered, name of intended registry                                                                                                                                                                                                     | 2-3                               |
|                                   | 2b      | All items from the World Health Organization Trial Registration Data Set                                                                                                                                                                                                                 | Clinical Trials.gov               |
| Protocol version                  | 3       | Date and version identifier                                                                                                                                                                                                                                                              | In Protocol, not shown in article |
| Funding                           | 4       | Sources and types of financial, material, and other support                                                                                                                                                                                                                              | 16                                |
| Roles and responsibilities        | 5a      | Names, affiliations, and roles of protocol contributors                                                                                                                                                                                                                                  | 16                                |
|                                   | 5b      | Name and contact information for the trial sponsor                                                                                                                                                                                                                                       | Clinical Trials.gov               |
|                                   | 5c      | Role of study sponsor and funders, if any, in study design; collection, management, analysis, and interpretation of data; writing of the report; and the decision to submit the report for publication, including whether they will have ultimate authority over any of these activities | 16                                |
|                                   | 5d      | Composition, roles, and responsibilities of the coordinating centre, steering committee, endpoint adjudication committee, data management team, and other individuals or groups overseeing the trial, if applicable (see Item 21a for data monitoring committee)                         | 10-11                             |

**Introduction**

|    |                                                           |     |                                                                                                                                                                                                                                                                                                                                                                                |                                   |
|----|-----------------------------------------------------------|-----|--------------------------------------------------------------------------------------------------------------------------------------------------------------------------------------------------------------------------------------------------------------------------------------------------------------------------------------------------------------------------------|-----------------------------------|
| 1  |                                                           |     |                                                                                                                                                                                                                                                                                                                                                                                |                                   |
| 2  | Background and rationale                                  | 6a  | Description of research question and justification for undertaking the trial, including summary of relevant studies (published and unpublished) examining benefits and harms for each intervention                                                                                                                                                                             | 5-6                               |
| 3  |                                                           |     |                                                                                                                                                                                                                                                                                                                                                                                |                                   |
| 4  |                                                           |     |                                                                                                                                                                                                                                                                                                                                                                                |                                   |
| 5  |                                                           |     |                                                                                                                                                                                                                                                                                                                                                                                |                                   |
| 6  |                                                           | 6b  | Explanation for choice of comparators                                                                                                                                                                                                                                                                                                                                          | 5                                 |
| 7  |                                                           |     |                                                                                                                                                                                                                                                                                                                                                                                |                                   |
| 8  | Objectives                                                | 7   | Specific objectives or hypotheses                                                                                                                                                                                                                                                                                                                                              | 6                                 |
| 9  |                                                           |     |                                                                                                                                                                                                                                                                                                                                                                                |                                   |
| 10 | Trial design                                              | 8   | Description of trial design including type of trial (eg, parallel group, crossover, factorial, single group), allocation ratio, and framework (eg, superiority, equivalence, noninferiority, exploratory)                                                                                                                                                                      | 7                                 |
| 11 |                                                           |     |                                                                                                                                                                                                                                                                                                                                                                                |                                   |
| 12 |                                                           |     |                                                                                                                                                                                                                                                                                                                                                                                |                                   |
| 13 |                                                           |     |                                                                                                                                                                                                                                                                                                                                                                                |                                   |
| 14 |                                                           |     |                                                                                                                                                                                                                                                                                                                                                                                |                                   |
| 15 |                                                           |     |                                                                                                                                                                                                                                                                                                                                                                                |                                   |
| 16 | <b>Methods: Participants, interventions, and outcomes</b> |     |                                                                                                                                                                                                                                                                                                                                                                                |                                   |
| 17 |                                                           |     |                                                                                                                                                                                                                                                                                                                                                                                |                                   |
| 18 | Study setting                                             | 9   | Description of study settings (eg, community clinic, academic hospital) and list of countries where data will be collected. Reference to where list of study sites can be obtained                                                                                                                                                                                             | 7                                 |
| 19 |                                                           |     |                                                                                                                                                                                                                                                                                                                                                                                |                                   |
| 20 |                                                           |     |                                                                                                                                                                                                                                                                                                                                                                                |                                   |
| 21 |                                                           |     |                                                                                                                                                                                                                                                                                                                                                                                |                                   |
| 22 |                                                           |     |                                                                                                                                                                                                                                                                                                                                                                                |                                   |
| 23 | Eligibility criteria                                      | 10  | Inclusion and exclusion criteria for participants. If applicable, eligibility criteria for study centres and individuals who will perform the interventions (eg, surgeons, psychotherapists)                                                                                                                                                                                   | 7-9                               |
| 24 |                                                           |     |                                                                                                                                                                                                                                                                                                                                                                                |                                   |
| 25 |                                                           |     |                                                                                                                                                                                                                                                                                                                                                                                |                                   |
| 26 |                                                           |     |                                                                                                                                                                                                                                                                                                                                                                                |                                   |
| 27 | Interventions                                             | 11a | Interventions for each group with sufficient detail to allow replication, including how and when they will be administered                                                                                                                                                                                                                                                     | 10                                |
| 28 |                                                           |     |                                                                                                                                                                                                                                                                                                                                                                                |                                   |
| 29 |                                                           |     |                                                                                                                                                                                                                                                                                                                                                                                |                                   |
| 30 |                                                           | 11b | Criteria for discontinuing or modifying allocated interventions for a given trial participant (eg, drug dose change in response to harms, participant request, or improving/worsening disease)                                                                                                                                                                                 | In Protocol, not shown in article |
| 31 |                                                           |     |                                                                                                                                                                                                                                                                                                                                                                                |                                   |
| 32 |                                                           |     |                                                                                                                                                                                                                                                                                                                                                                                |                                   |
| 33 |                                                           |     |                                                                                                                                                                                                                                                                                                                                                                                |                                   |
| 34 |                                                           |     |                                                                                                                                                                                                                                                                                                                                                                                |                                   |
| 35 |                                                           |     |                                                                                                                                                                                                                                                                                                                                                                                |                                   |
| 36 |                                                           |     |                                                                                                                                                                                                                                                                                                                                                                                |                                   |
| 37 |                                                           | 11c | Strategies to improve adherence to intervention protocols, and any procedures for monitoring adherence (eg, drug tablet return, laboratory tests)                                                                                                                                                                                                                              | In Protocol, not shown in article |
| 38 |                                                           |     |                                                                                                                                                                                                                                                                                                                                                                                |                                   |
| 39 |                                                           |     |                                                                                                                                                                                                                                                                                                                                                                                |                                   |
| 40 |                                                           |     |                                                                                                                                                                                                                                                                                                                                                                                |                                   |
| 41 |                                                           |     |                                                                                                                                                                                                                                                                                                                                                                                |                                   |
| 42 |                                                           |     |                                                                                                                                                                                                                                                                                                                                                                                |                                   |
| 43 |                                                           |     |                                                                                                                                                                                                                                                                                                                                                                                |                                   |
| 44 |                                                           | 11d | Relevant concomitant care and interventions that are permitted or prohibited during the trial                                                                                                                                                                                                                                                                                  | In Protocol, not shown in article |
| 45 |                                                           |     |                                                                                                                                                                                                                                                                                                                                                                                |                                   |
| 46 |                                                           |     |                                                                                                                                                                                                                                                                                                                                                                                |                                   |
| 47 |                                                           |     |                                                                                                                                                                                                                                                                                                                                                                                |                                   |
| 48 |                                                           |     |                                                                                                                                                                                                                                                                                                                                                                                |                                   |
| 49 |                                                           |     |                                                                                                                                                                                                                                                                                                                                                                                |                                   |
| 50 |                                                           |     |                                                                                                                                                                                                                                                                                                                                                                                |                                   |
| 51 | Outcomes                                                  | 12  | Primary, secondary, and other outcomes, including the specific measurement variable (eg, systolic blood pressure), analysis metric (eg, change from baseline, final value, time to event), method of aggregation (eg, median, proportion), and time point for each outcome. Explanation of the clinical relevance of chosen efficacy and harm outcomes is strongly recommended | 10-11                             |
| 52 |                                                           |     |                                                                                                                                                                                                                                                                                                                                                                                |                                   |
| 53 |                                                           |     |                                                                                                                                                                                                                                                                                                                                                                                |                                   |
| 54 |                                                           |     |                                                                                                                                                                                                                                                                                                                                                                                |                                   |
| 55 |                                                           |     |                                                                                                                                                                                                                                                                                                                                                                                |                                   |
| 56 |                                                           |     |                                                                                                                                                                                                                                                                                                                                                                                |                                   |
| 57 |                                                           |     |                                                                                                                                                                                                                                                                                                                                                                                |                                   |
| 58 |                                                           |     |                                                                                                                                                                                                                                                                                                                                                                                |                                   |
| 59 |                                                           |     |                                                                                                                                                                                                                                                                                                                                                                                |                                   |
| 60 |                                                           |     |                                                                                                                                                                                                                                                                                                                                                                                |                                   |

|    |             |    |                                                                  |           |
|----|-------------|----|------------------------------------------------------------------|-----------|
| 1  |             |    |                                                                  |           |
| 2  | Participant | 13 | Time schedule of enrolment, interventions (including any run-ins | Figure    |
| 3  | timeline    |    | and washouts), assessments, and visits for participants. A       | 1         |
| 4  |             |    | schematic diagram is highly recommended (see Figure)             |           |
| 5  |             |    |                                                                  |           |
| 6  | Sample size | 14 | Estimated number of participants needed to achieve study         | 12        |
| 7  |             |    | objectives and how it was determined, including clinical and     |           |
| 8  |             |    | statistical assumptions supporting any sample size calculations  |           |
| 9  |             |    |                                                                  |           |
| 10 | Recruitment | 15 | Strategies for achieving adequate participant enrolment to reach | In        |
| 11 |             |    | target sample size                                               | Protocol, |
| 12 |             |    |                                                                  | not       |
| 13 |             |    |                                                                  | shown in  |
| 14 |             |    |                                                                  | article   |
| 15 |             |    |                                                                  |           |
| 16 |             |    |                                                                  |           |
| 17 |             |    |                                                                  |           |

### Methods: Assignment of interventions (for controlled trials)

#### Allocation:

|    |            |     |                                                                    |       |
|----|------------|-----|--------------------------------------------------------------------|-------|
| 21 |            |     |                                                                    |       |
| 22 | Sequence   | 16a | Method of generating the allocation sequence (eg, computer-        | 9-10  |
| 23 | generation |     | generated random numbers), and list of any factors for             |       |
| 24 |            |     | stratification. To reduce predictability of a random sequence,     |       |
| 25 |            |     | details of any planned restriction (eg, blocking) should be        |       |
| 26 |            |     | provided in a separate document that is unavailable to those who   |       |
| 27 |            |     | enrol participants or assign interventions                         |       |
| 28 |            |     |                                                                    |       |
| 29 |            |     |                                                                    |       |
| 30 | Allocation | 16b | Mechanism of implementing the allocation sequence (eg, central     | 9-10  |
| 31 | concealme  |     | telephone; sequentially numbered, opaque, sealed envelopes),       |       |
| 32 | nt         |     | describing any steps to conceal the sequence until interventions   |       |
| 33 | mechanism  |     | are assigned                                                       |       |
| 34 |            |     |                                                                    |       |
| 35 | Implement  | 16c | Who will generate the allocation sequence, who will enrol          | 9-10  |
| 36 | ation      |     | participants, and who will assign participants to interventions    |       |
| 37 |            |     |                                                                    |       |
| 38 | Blinding   | 17a | Who will be blinded after assignment to interventions (eg, trial   | 10-11 |
| 39 | (masking)  |     | participants, care providers, outcome assessors, data analysts),   |       |
| 40 |            |     | and how                                                            |       |
| 41 |            |     |                                                                    |       |
| 42 |            |     |                                                                    |       |
| 43 |            | 17b | If blinded, circumstances under which unblinding is permissible,   | NA    |
| 44 |            |     | and procedure for revealing a participant's allocated intervention |       |
| 45 |            |     | during the trial                                                   |       |
| 46 |            |     |                                                                    |       |
| 47 |            |     |                                                                    |       |

### Methods: Data collection, management, and analysis

|    |            |     |                                                                       |       |
|----|------------|-----|-----------------------------------------------------------------------|-------|
| 49 |            |     |                                                                       |       |
| 50 | Data       | 18a | Plans for assessment and collection of outcome, baseline, and         | 11-12 |
| 51 | collection |     | other trial data, including any related processes to promote data     |       |
| 52 | methods    |     | quality (eg, duplicate measurements, training of assessors) and a     |       |
| 53 |            |     | description of study instruments (eg, questionnaires, laboratory      |       |
| 54 |            |     | tests) along with their reliability and validity, if known. Reference |       |
| 55 |            |     | to where data collection forms can be found, if not in the protocol   |       |
| 56 |            |     |                                                                       |       |
| 57 |            |     |                                                                       |       |
| 58 |            |     |                                                                       |       |
| 59 |            |     |                                                                       |       |
| 60 |            |     |                                                                       |       |

|    |                                 |     |                                                                          |
|----|---------------------------------|-----|--------------------------------------------------------------------------|
| 1  |                                 |     |                                                                          |
| 2  |                                 | 18b | Plans to promote participant retention and complete follow-up, 11-12     |
| 3  |                                 |     | including list of any outcome data to be collected for participants      |
| 4  |                                 |     | who discontinue or deviate from intervention protocols                   |
| 5  |                                 |     |                                                                          |
| 6  | Data                            | 19  | Plans for data entry, coding, security, and storage, including any 11-12 |
| 7  | management                      |     | related processes to promote data quality (eg, double data entry;        |
| 8  |                                 |     | range checks for data values). Reference to where details of data        |
| 9  |                                 |     | management procedures can be found, if not in the protocol               |
| 10 |                                 |     |                                                                          |
| 11 |                                 |     |                                                                          |
| 12 | Statistical                     | 20a | Statistical methods for analysing primary and secondary 13               |
| 13 | methods                         |     | outcomes. Reference to where other details of the statistical            |
| 14 |                                 |     | analysis plan can be found, if not in the protocol                       |
| 15 |                                 |     |                                                                          |
| 16 |                                 | 20b | Methods for any additional analyses (eg, subgroup and adjusted 13        |
| 17 |                                 |     | analyses)                                                                |
| 18 |                                 |     |                                                                          |
| 19 |                                 | 20c | Definition of analysis population relating to protocol non- 13           |
| 20 |                                 |     | adherence (eg, as randomised analysis), and any statistical              |
| 21 |                                 |     | methods to handle missing data (eg, multiple imputation)                 |
| 22 |                                 |     |                                                                          |
| 23 |                                 |     |                                                                          |
| 24 | <b>Methods: Monitoring</b>      |     |                                                                          |
| 25 |                                 |     |                                                                          |
| 26 | Data                            | 21a | Composition of data monitoring committee (DMC); summary of its 12        |
| 27 | monitoring                      |     | role and reporting structure; statement of whether it is                 |
| 28 |                                 |     | independent from the sponsor and competing interests; and                |
| 29 |                                 |     | reference to where further details about its charter can be found,       |
| 30 |                                 |     | if not in the protocol. Alternatively, an explanation of why a DMC       |
| 31 |                                 |     | is not needed                                                            |
| 32 |                                 |     |                                                                          |
| 33 |                                 |     |                                                                          |
| 34 |                                 | 21b | Description of any interim analyses and stopping guidelines, NA          |
| 35 |                                 |     | including who will have access to these interim results and make         |
| 36 |                                 |     | the final decision to terminate the trial                                |
| 37 |                                 |     |                                                                          |
| 38 | Harms                           | 22  | Plans for collecting, assessing, reporting, and managing solicited 12    |
| 39 |                                 |     | and spontaneously reported adverse events and other                      |
| 40 |                                 |     | unintended effects of trial interventions or trial conduct               |
| 41 |                                 |     |                                                                          |
| 42 |                                 |     |                                                                          |
| 43 | Auditing                        | 23  | Frequency and procedures for auditing trial conduct, if any, and 12      |
| 44 |                                 |     | whether the process will be independent from investigators and           |
| 45 |                                 |     | the sponsor                                                              |
| 46 |                                 |     |                                                                          |
| 47 |                                 |     |                                                                          |
| 48 | <b>Ethics and dissemination</b> |     |                                                                          |
| 49 |                                 |     |                                                                          |
| 50 | Research                        | 24  | Plans for seeking research ethics committee/institutional review 3       |
| 51 | ethics                          |     | board (REC/IRB) approval                                                 |
| 52 | approval                        |     |                                                                          |
| 53 |                                 |     |                                                                          |
| 54 | Protocol                        | 25  | Plans for communicating important protocol modifications (eg, 3          |
| 55 | amendments                      |     | changes to eligibility criteria, outcomes, analyses) to relevant         |
| 56 |                                 |     | parties (eg, investigators, REC/IRBs, trial participants, trial          |
| 57 |                                 |     | registries, journals, regulators)                                        |
| 58 |                                 |     |                                                                          |
| 59 |                                 |     |                                                                          |
| 60 |                                 |     |                                                                          |

|    |                   |     |                                                                      |          |
|----|-------------------|-----|----------------------------------------------------------------------|----------|
| 1  |                   |     |                                                                      |          |
| 2  | Consent or        | 26a | Who will obtain informed consent or assent from potential trial      | 3        |
| 3  | assent            |     | participants or authorised surrogates, and how (see Item 32)         |          |
| 4  |                   |     |                                                                      |          |
| 5  |                   | 26b | Additional consent provisions for collection and use of participant  | NA       |
| 6  |                   |     | data and biological specimens in ancillary studies, if applicable    |          |
| 7  |                   |     |                                                                      |          |
| 8  | Confidentiality   | 27  | How personal information about potential and enrolled                | In       |
| 9  |                   |     | participants will be collected, shared, and maintained in order to   | protocol |
| 10 |                   |     | protect confidentiality before, during, and after the trial          | , not    |
| 11 |                   |     |                                                                      | shown in |
| 12 |                   |     |                                                                      | article  |
| 13 |                   |     |                                                                      |          |
| 14 |                   |     |                                                                      |          |
| 15 | Declaration of    | 28  | Financial and other competing interests for principal investigators  | 16       |
| 16 | interests         |     | for the overall trial and each study site                            |          |
| 17 |                   |     |                                                                      |          |
| 18 | Access to         | 29  | Statement of who will have access to the final trial dataset, and    | 16       |
| 19 | data              |     | disclosure of contractual agreements that limit such access for      |          |
| 20 |                   |     | investigators                                                        |          |
| 21 |                   |     |                                                                      |          |
| 22 |                   |     |                                                                      |          |
| 23 | Ancillary and     | 30  | Provisions, if any, for ancillary and post-trial care, and for       | In       |
| 24 | post-trial care   |     | compensation to those who suffer harm from trial participation       | protocol |
| 25 |                   |     |                                                                      | , not    |
| 26 |                   |     |                                                                      | shown in |
| 27 |                   |     |                                                                      | article  |
| 28 |                   |     |                                                                      |          |
| 29 |                   |     |                                                                      |          |
| 30 | Dissemination     | 31a | Plans for investigators and sponsor to communicate trial results     | See      |
| 31 | policy            |     | to participants, healthcare professionals, the public, and other     | consent  |
| 32 |                   |     | relevant groups (eg, via publication, reporting in results           | from     |
| 33 |                   |     | databases, or other data sharing arrangements), including any        |          |
| 34 |                   |     | publication restrictions                                             | 3        |
| 35 |                   |     |                                                                      |          |
| 36 |                   |     |                                                                      |          |
| 37 |                   | 31b | Authorship eligibility guidelines and any intended use of            | In       |
| 38 |                   |     | professional writers                                                 | protocol |
| 39 |                   |     |                                                                      | , not    |
| 40 |                   |     |                                                                      | shown in |
| 41 |                   |     |                                                                      | article  |
| 42 |                   |     |                                                                      |          |
| 43 |                   |     |                                                                      |          |
| 44 |                   | 31c | Plans, if any, for granting public access to the full protocol,      | NA       |
| 45 |                   |     | participant-level dataset, and statistical code                      |          |
| 46 |                   |     |                                                                      |          |
| 47 | <b>Appendices</b> |     |                                                                      |          |
| 48 |                   |     |                                                                      |          |
| 49 | Informed          | 32  | Model consent form and other related documentation given to          | We       |
| 50 | consent           |     | participants and authorised surrogates                               | provide  |
| 51 | materials         |     |                                                                      | a model  |
| 52 |                   |     |                                                                      | consent  |
| 53 |                   |     |                                                                      | from     |
| 54 |                   |     |                                                                      |          |
| 55 |                   |     |                                                                      |          |
| 56 | Biological        | 33  | Plans for collection, laboratory evaluation, and storage of          | NA       |
| 57 | specimens         |     | biological specimens for genetic or molecular analysis in the        |          |
| 58 |                   |     | current trial and for future use in ancillary studies, if applicable |          |
| 59 |                   |     |                                                                      |          |
| 60 |                   |     |                                                                      |          |

1 \*It is strongly recommended that this checklist be read in conjunction with the SPIRIT 2013  
2 Explanation & Elaboration for important clarification on the items. Amendments to the  
3 protocol should be tracked and dated. The SPIRIT checklist is copyrighted by the SPIRIT  
4 Group under the Creative Commons "[Attribution-NonCommercial-NoDerivs 3.0 Unported](#)"  
5 license.  
6  
7  
8  
9  
10  
11  
12  
13  
14  
15  
16  
17  
18  
19  
20  
21  
22  
23  
24  
25  
26  
27  
28  
29  
30  
31  
32  
33  
34  
35  
36  
37  
38  
39  
40  
41  
42  
43  
44  
45  
46  
47  
48  
49  
50  
51  
52  
53  
54  
55  
56  
57  
58  
59  
60

For peer review only

# BMJ Open

## Efficacy and Safety of Tirofiban in Patients with Acute Branch Atherosclerotic Disease(BAD)-Related Stroke (BRANT): Protocol for a Randomized Controlled Trial

|                                 |                                                                                                                                                                                                                                                                                                                                                                                                                                                                  |
|---------------------------------|------------------------------------------------------------------------------------------------------------------------------------------------------------------------------------------------------------------------------------------------------------------------------------------------------------------------------------------------------------------------------------------------------------------------------------------------------------------|
| Journal:                        | <i>BMJ Open</i>                                                                                                                                                                                                                                                                                                                                                                                                                                                  |
| Manuscript ID                   | bmjopen-2023-082141.R3                                                                                                                                                                                                                                                                                                                                                                                                                                           |
| Article Type:                   | Protocol                                                                                                                                                                                                                                                                                                                                                                                                                                                         |
| Date Submitted by the Author:   | 05-Apr-2024                                                                                                                                                                                                                                                                                                                                                                                                                                                      |
| Complete List of Authors:       | Li, Shengde; Peking Union Medical College Hospital, dingding, zhang; peking union medical college hopspital Sha, Yuhui; Peking Union Medical College, Department of Neurology yicheng, zhu; Peking Union Medical College Hospital, Neurology Zhou, Lixin; Peking Union Medical College, Department of Neurology Peng, Bin; Peking Union Medical College Hospital Ni, Jun; Peking Union Medical College Hospital Department of Neurology, Department of Neurology |
| <b>Primary Subject Heading</b>: | Neurology                                                                                                                                                                                                                                                                                                                                                                                                                                                        |
| Secondary Subject Heading:      | Cardiovascular medicine                                                                                                                                                                                                                                                                                                                                                                                                                                          |
| Keywords:                       | Stroke < NEUROLOGY, Prognosis, THERAPEUTICS                                                                                                                                                                                                                                                                                                                                                                                                                      |
|                                 |                                                                                                                                                                                                                                                                                                                                                                                                                                                                  |

SCHOLARONE™  
Manuscripts



1  
2  
3  
4 **Efficacy and Safety of Tirofiban in Patients with Acute Branch Atherosclerotic**  
5  
6 **Disease(BAD)-Related Stroke (BRANT): Protocol for a Randomized Controlled**  
7  
8  
9 **Trial**  
10

11 **Authors:** Shengde Li, MD;1 Dingding Zhang, PhD;2 Yuhui Sha, MD;1 Yicheng Zhu,  
12  
13  
14 MD;1 Lixin Zhou, MD;1 Bin Peng, MD;1 Jun Ni, MD.1  
15  
16

17  
18  
19 1 Department of Neurology, State Key Laboratory of Complex Severe and Rare  
20  
21 Diseases, Peking Union Medical College Hospital, Chinese Academy of Medical  
22  
23 Science and Peking Union Medical College, Beijing, China.  
24  
25

26  
27 2 Medical Research Center, State Key laboratory of Complex Severe and Rare Diseases,  
28  
29 Peking Union Medical College Hospital, Chinese Academy of Medical Sciences and  
30  
31 Peking Union Medical College, Beijing, China.  
32  
33

34  
35 **Corresponding author:**  
36

37 Jun Ni, MD  
38

39  
40 Department of Neurology, Peking Union Medical College Hospital, Beijing, China.  
41

42  
43 Department of Neurology, Peking Union Medical College Hospital, Shuaifuyuan1,  
44  
45 Dong Cheng District, Beijing, 100730, China  
46

47  
48 Phone: +86 10 69156371  
49

50  
51 Fax: +86 10 69156371  
52

53  
54 E-mail: pumchnijun@163.com  
55

56 **Total word count: 4277**  
57  
58  
59  
60

## Abstract

**Introduction:** Branch atheromatous disease (BAD)-related stroke is increasingly becoming a clinical entity and prone to early neurological deterioration (END) and poor prognosis. There are no effective regimens to reduce the disability caused by BAD-related stroke in acute phase. Recent studies have indicated the efficacy of tirofiban in acute ischemic stroke, however, its efficacy has not been validated in patients with BAD-related stroke. Thus, we aim to test whether intravenous tirofiban initiated within 48 hours after onset would improve the functional outcome in patients with acute BAD-related stroke, in comparison with standard antiplatelet therapy based on the current guideline.

**Methods and analysis:** BRANT is a multicenter, randomized, open-label, blinded endpoint, parallel-controlled, phase III trial conducted in 21 hospitals in China. Participants aged 18-75 years with acute BAD-related stroke within 48 h after stroke onset are randomized in a 1:1 ratio to the tirofiban or control group. The treatment period is 48 hours in both groups. The primary outcome is the excellent functional outcome (modified Rankin Scale score: 0-1) at 90 days. The secondary outcomes include END, major bleeding, stroke, death, functional status, serious adverse events, and change in bleeding-related markers. Assuming the rates of the primary outcome to be 74% in the tirofiban group and 62% in the control group, a total of 516 participants are needed for 0.8 power (two-sided 0.05 alpha).

**Ethics and dissemination:** BRANT study has been approved by the Ethics Committee of the Peking Union Medical College Hospital (I-23PJ1242). Written informed consent

1  
2  
3  
4 is required for all patients before enrollment. The results of the study will be published  
5  
6 in a peer-reviewed journal.  
7

8  
9 **Trial registration number** ClinicalTrials.gov (NCT06037889)  
10

11 **Keywords:** Branch Atheromatous Disease, Acute ischemic stroke, Early neurological  
12  
13 deterioration, Functional outcome, Tirofiban, Treatment  
14  
15  
16  
17  
18  
19  
20  
21  
22  
23  
24  
25  
26  
27  
28  
29  
30  
31  
32  
33  
34  
35  
36  
37  
38  
39  
40  
41  
42  
43  
44  
45  
46  
47  
48  
49  
50  
51  
52  
53  
54  
55  
56  
57  
58  
59  
60

For peer review only

### Strengths and limitations of this study

1. With the aid of magnetic resonance imaging, this study focuses on patients with acute BAD-related stroke, which had been inappropriately classified as small-vessel occlusion or an undetermined aetiology by the TOAST system in previous studies.
2. Intervention will be initiated within 48 hours of onset, which is more in line with the timeliness of BAD treatment.
3. Lack of double-blinded design is a limitation, but the endpoints are measured in a blinded manner.

## Introduction

Branch atheromatous disease (BAD), first described conceptually by Caplan in 1989, is being confirmed as a clinical entity with the aid of advanced neuroimaging.[1-3] BAD-related stroke, characterized by subcortical single infarcts in penetrating artery territories without severe stenosis of the large parent artery, accounts for 20.4% of all ischaemic stroke cases in Asian populations[2 4]. Differing from lacunar infarct due to lipohyalinosis, BAD-related stroke is caused by parent arterial plaque occlusion of the perforating orifice or proximal atherosclerotic occlusion of the perforating artery[1-3], which could be identified from small-vessel occlusion or stroke of undetermined source in the Trial Org 10172 in Acute Stroke Treatment (TOAST) system[5 6].

High incidence of early neurological deterioration (END) has been observed in BAD-related stroke and is strongly associated with poor prognosis[7 8]. The rate of END is higher in BAD-related stroke than lacunar infarct (26.8-37.5% vs. 6.3-18.6%), and thrombolysis itself cannot prevent the occurrence of END[7-9]. In addition, it remains unclear whether intravenous thrombolysis could improve the clinical outcome in BAD-related stroke[10]. The rate of disability can reach 61%[2]. However, there are no high-level recommendations for acute-phase treatment of BAD-related stroke, and no Randomized Controlled Trial (RCT) has examined BAD as a separate disease. Current practice—based on limited observational data and expert opinion—is heterogeneous, including anticoagulant and mono/dual antiplatelet therapy, the efficacy of which is uncertain for BAD-related stroke[11 12].

Tirofiban, a selective and reversible antagonist of glycoprotein IIb/IIIa inhibitors on

1  
2  
3  
4 platelets, might be more effective than conventional agents (such as aspirin or  
5  
6 clopidogrel) by blocking the final common pathway of platelet aggregation at the  
7  
8 pathophysiological level[13]. In clinical studies, historical evidence has also reported  
9  
10 that tirofiban increases the recanalization rate and improves functional prognosis in  
11  
12 stroke patients with endovascular therapy without increasing bleeding risk[14-16]. A  
13  
14 large randomized trial of patients with stroke without large or medium-sized vessel  
15  
16 occlusion also reported the efficacy of tirofiban[17]. However, though an  
17  
18 atherosclerotic mechanism is presumed to exist between BAD and large artery  
19  
20 atherosclerosis, this evidence may not be generalized to BAD-related stroke, as  
21  
22 retrospective data or small samples may introduce selection bias[14 18]. Moreover,  
23  
24 about 78.6%-90.9% of END occurs within 48 h after onset[19 20]. Our preliminary  
25  
26 results of a cohort with BAD-related stroke found that the median time from onset to  
27  
28 END was 38 h. We hypothesised that early tirofiban administration could improve  
29  
30 functional prognosis by preventing the occurrence of END. However, tirofiban was  
31  
32 often prescribed after END in previous studies, which might cause irreversible ischemic  
33  
34 lesions and neurologic deficits[14 17]. Thus, randomised controlled trials of acute  
35  
36 BAD-related stroke are needed and have been requested by researchers[3 4]. In addition,  
37  
38 we speculated that tirofiban should be initiated within 48 h after onset to prevent the  
39  
40 occurrence of END.  
41  
42  
43  
44  
45  
46  
47  
48  
49  
50  
51

52  
53 The BRANT trial aims to establish the efficacy and safety of intravenous tirofiban for  
54  
55 improving functional outcome in patients with acute BAD-related stroke.  
56  
57  
58  
59  
60

## Methods

### Design

This is a multicenter, randomized, open-label, blinded-endpoint, parallel-controlled phase III trial. The BRANT study began enrolment on November 9, 2023, and the anticipated date of study completion is October 31, 2025.

### Patient population

BRANT will enroll 516 participants with BAD-related stroke within 48 hours of onset, from 21 centers in China.

### Inclusion criteria

- Age: 18-75 years old [21 22]
- Acute ischemic stroke
- Time from onset to randomization  $\leq 48\text{h}$ ; if onset time is unknown, time from last known well to randomization  $\leq 48\text{h}$
- Meet the following BAD Diagnostic Imaging Criteria
  1. Diffusion Weighted Imaging (DWI) infarcts: single (isolated) deep (subcortical) infarcts;
  2. The culprit arteries are either lenticulostriate artery (LSA) or paramedian pontine artery (PPA), and the infarct lesion on DWI conforms to one of the following characteristics (A/B):
    - A. LSA: “Comma-like” infarct lesions with “fan-shaped” extension from bottom to top in the coronary position; or  $\geq 3$  layers (layer thickness 5–7 mm) on axial DWI brain images;

1  
2  
3  
4 B. PPA: The infarct lesion extends from the deep pons to the ventral pons on  
5  
6 the axial DWI brain images;

- 7  
8  
9 ● No more than 50% stenosis on the parent artery of the criminal artery (i.e.  
10  
11 corresponding basilar or middle cerebral artery) (Confirmed by magnetic  
12  
13 resonance angiography[MRA]/ computed tomography angiography [CTA]/  
14  
15 digital subtraction angiography [DSA])  
16  
17  
18 ● Signed informed consent by the patient or legally authorized representatives.  
19  
20  
21

### 22 **Exclusion criteria**

- 23  
24 ● Transient ischemic attack (TIA)  
25  
26  
27 ● Intracranial hemorrhagic diseases, vascular malformations, aneurysms, brain  
28  
29 abscesses, malignant space-occupying lesions, or other non- ischemic  
30  
31 intracranial lesions detected by baseline computed tomography(CT)/ magnetic  
32  
33 resonance imaging (MRI), or MRA/CTA/ DSA  
34  
35  
36 ● Presence of  $\geq 50\%$  stenosis in extracranial artery in tandem relationship  
37  
38 ipsilateral to the lesion  
39  
40  
41  
42 ● Cardiogenic embolism: atrial fibrillation, myocardial infarction, heart valve  
43  
44 disease, dilated cardiomyopathy, infective endocarditis, atrioventricular block  
45  
46 disease, heart rate less than 50 beats per minute  
47  
48  
49  
50 ● Have received or plan to receive endovascular therapy or thrombolysis after  
51  
52 onset  
53  
54  
55 ● Stroke of other clear causes, e.g., moyamoya disease, arterial entrapment,  
56  
57 vasculitis, etc.  
58  
59  
60



- modified Rankin Scale score  $\geq 2$  before onset
- Use of tirofiban within 1 week before or after onset
- Low platelets ( $<100 \times 10^9/L$ ), or prothrombin time  $>1.3$  times of the upper normal limit, or international normalised ratio (INR)  $>1.5$ , or other systemic hemorrhagic tendencies such as hematologic disorders
- Elevation of alanine aminotransferase (ALT) or aspartate aminotransferase (AST) more than 1.5 times the upper normal limit
- Glomerular filtration rate  $<60$  mL/min/1.73m<sup>2</sup>
- Known malignant tumors
- History of trauma or major surgical intervention within 6 weeks prior to onset
- History of intracranial hemorrhage
- Active or recent history (within 30 days prior to onset) of clinical bleeding (e.g., gastrointestinal bleeding)
- Malignant hypertension (systolic blood pressure  $>200$  mmHg, or diastolic blood pressure  $>120$  mmHg)
- Life expectancy  $\leq 6$  months
- Contraindications of 3 T MRI examination
- Pregnant or lactating women
- Have participated in another clinical trial within 3 months prior to the date of informed consent or are participating in another clinical trial

## Randomization

1  
2  
3  
4 Participants will be randomized in a 1:1 ratio using a dynamic block randomization  
5  
6 method via an independent central website. The block sizes were set to 6, 8, and 12.  
7  
8  
9 The allocation sequence is stored on the central website and the participant will be  
10  
11 assigned to the intervention or control group in a 1:1 ratio according to the order of  
12  
13 enrolment.  
14  
15

### 16 17 18 19 **Intervention**

20  
21  
22 Tirofiban group: Intravenous tirofiban will be administered immediately after  
23  
24 randomization for a total duration of 48 hours with a loading dose of 0.4µg  
25  
26 /kg/min×30min, followed by a maintenance dose of 0.1µg /kg/min×47.5h (Figure1).  
27  
28

29  
30 Control group: Standard antiplatelet therapy based on Chinese stroke guideline will be  
31  
32 initiated after randomization for a total duration of 48 hours, as the two following types:  
33  
34

35 (1) aspirin 150-300 mg qd, or (2) aspirin 100 mg qd plus clopidogrel 75 mg qd.[23] Its  
36  
37 initiation will be determined based on the last administration time of antithrombotic  
38  
39 drugs; however, the drug should be administered as soon as possible.  
40  
41

42  
43 After a 48-hour treatment period in both groups, the standard of care, including an  
44  
45 antithrombotic regimen, will be performed based on current guidelines and recorded in  
46  
47 detail (Figure 1).  
48  
49

### 50 51 **Primary outcomes**

52  
53 The primary outcome is excellent functional outcome at 90 days, defined as modified  
54  
55 Rankin Scale score of 0-1[24]. Primary outcome will be measured by the qualified  
56  
57 evaluators who are blinded to all procedures.  
58  
59  
60

## Secondary outcomes

Secondary efficacy outcomes include END, National Institutes of Health Stroke Scale (NIHSS) score, Barthel index score, ischemic stroke, stroke, TIA, and a composite event of new-onset stroke, myocardial infarction, and all-cause death. Excellent functional outcome at 7 days is also listed as a secondary efficacy outcome. Safety outcomes include major bleeding as defined by the PLATO criteria, adverse events, all-cause death, and changes in bleeding-related markers[25]. The evaluators will not be aware of the treatment assignment after randomization. All the clinical and safety events will be re-examined by the independent Clinical Event Committee (CEC), who will be blinded during all procedures.

Considering the predictive value of END, we adopted the widely used and conservative definition of END for the BRANT study<sup>[26]</sup>. The presence of END is determined by an increase of  $\geq 4$  points in the NIHSS or an increase of  $\geq 2$  points in the NIHSS motor score. The NIHSS motor score refers to bilateral upper and lower extremity mobility scores. The baseline NIHSS score for the calculation of END is the first clinician evaluated and recorded NIHSS score after onset. The time frame for post-randomisation END is within 7 days of randomization.

## Study protocol and data management

A study flowchart is shown in Figure 1 and Table S1. At visit 1, trained investigators will recruit patients based on screening age, onset time, MRI, and other enrolment criteria (i.e. intracranial artery and electrocardiogram). The investigator will then

1  
2  
3  
4 explain the BRANT study to the patient in detail, including the contents of each visit  
5  
6 and the interventions. After obtaining written informed consent, the participants will be  
7  
8 assigned to the tirofiban or control groups via a central website-based randomization  
9  
10 system. Patients are encouraged to undergo on-site follow-up at 90 days. Demographic,  
11  
12 clinical, radiological, laboratory, and clinical event data at each visit (Table S1) will be  
13  
14 collected and stored in an electronic case report form (CRF) via a secure website. All  
15  
16 CRFs will be checked by local investigators for completeness and correction prior to  
17  
18 data entry. The data will be checked dynamically by the principal investigator (Jun Ni)  
19  
20 with the aid of research assistants.  
21  
22  
23  
24  
25  
26  
27  
28  
29

### 30 **Data Monitoring Board**

31  
32 An independent Data Security Monitoring Board (DSMB), including academic experts  
33  
34 and statisticians, has been established to protect the interests of the participants during  
35  
36 the study. The DSMB will review the overall implementation of the clinical study and  
37  
38 regularly and dynamically assess the risks and benefits, particularly unexpected adverse  
39  
40 events. The DSMB reports to the Executive Committee and provides professional  
41  
42 advice.  
43  
44  
45  
46  
47  
48  
49

### 50 **Sample size estimates**

51  
52 Based on previous studies and clinical practice, we assumed the rates of the primary  
53  
54 outcome to be 62% and 74% in the control and tirofiban groups, respectively<sup>[2 14-16 18</sup>  
55  
56  
57  
58  
59  
60

1  
2  
3  
4 27-29]. Thus, 234 participants per arm are needed for a two-sided test at alpha 0.05 and  
5  
6 power 0.8. Considering a dropout rate of 10%, 516 patients will be required.  
7  
8  
9

### 10 11 **Statistical analyses**

12  
13  
14 According to the principle of intention-to-treat analysis, all participants who are  
15  
16 randomized into groups with more than one efficacy evaluation will be included in the  
17  
18 full analysis set. The estimation of missing values will be conducted by the carry-over  
19  
20 based on last observation carried forward (LOCF) estimation method. The proportion  
21  
22 of excellent outcomes at 90 days will be compared using the chi-square tests, and shown  
23  
24 as frequency (percentage). Most secondary outcome analyses will also use the primary  
25  
26 outcome analysis strategy. Survival data will be calculated using the Kaplan-Meier  
27  
28 method to estimate the survival rate in each group, and efficacy will be assessed using  
29  
30 the log-rank test. Hazard ratios (HRs) and 95% confidence intervals (CI) will be  
31  
32 calculated using the Cox proportional hazards model. Non-survival data will be  
33  
34 analysed using the chi-square test, and odds ratios and 95% CIs will be calculated.  
35  
36 Continuous variables will be compared between the two groups using the Student's t-  
37  
38 test or Wilcoxon rank-sum test. The influence of covariables will be evaluated using  
39  
40 subgroup analysis. No interim analysis is planned in this trial. All analyses will be  
41  
42 performed using SAS 9.4, and a two-sided  $P < 0.05$  is considered significant.  
43  
44  
45  
46  
47  
48  
49  
50  
51  
52  
53  
54  
55

### 56 **Patient and public involvement statement**

57  
58 None.  
59  
60

1  
2  
3  
4  
5  
6  
7 **Ethics and dissemination:** The BRANT study was approved by the Ethics Committee  
8  
9 of Peking Union Medical College Hospital (I-23PJ1242) on July 20, 2023. Written  
10  
11 informed consent is required from all patients before enrolment. BRANT will be carried  
12  
13 out according to Good Clinical Practice and the Declaration of Helsinki. Protocol  
14  
15 amendments will be reported to the institutional ethics committee. The trial sponsor is  
16  
17 Peking Union Medical College Hospital. The trial results will be published in a peer-  
18  
19 reviewed journal.  
20  
21  
22  
23  
24  
25  
26

## 27 **Discussion**

28  
29 The BRANT trial is a multicentre RCT that addresses the important treatment dilemma  
30  
31 of improving the functional outcomes of BAD-related stroke.  
32  
33

34  
35 BAD was first proposed by Caplan in 1989 to be distinct from lacunar infarct[1].  
36  
37 However, in the past three decades, most clinical studies have classified BAD as small-  
38  
39 vessel occlusion or undetermined etiology based on the TOAST system<sup>[4 30]</sup>. Few  
40  
41 studies focused on acute BAD-related stroke, probably due to discrepant definitions[3].  
42  
43 Recently, an increasing number of observational studies found distinct clinical,  
44  
45 radiologic, and prognostic features that patients with BAD-related stroke are prone to  
46  
47 END and poor prognosis<sup>[2 31]</sup>.  
48  
49  
50

51  
52  
53 Owing to the limitations of neuroimaging techniques, the perforating artery, such as the  
54  
55 LSA or PPA, cannot be directly visualized. Radiological diagnosis is based on the  
56  
57 vascular territory, dimension, or shape of the lesion<sup>[3 32]</sup>, which results in a huge  
58  
59  
60

1  
2  
3  
4 variations among BAD definitions. With the aid of neuroimaging and clinical practice,  
5  
6 Asian neurologists proposed radiological diagnosis criteria for BAD<sup>[33 34]</sup>. Our previous  
7  
8 study also found that  $\geq 4$  consecutive slices on axial view are more effective than  
9  
10 transversal diameter to differentiate atherosclerotic mechanisms of single subcortical  
11  
12 infarction in the LSA territory<sup>[35]</sup>. Considering the generalisation and diagnostic  
13  
14 accuracy of our study, we used  $\geq 3$  consecutive layers on axial DWI series instead of  
15  
16 lesion diameter to define BAD-related stroke in the LSA territory<sup>[36]</sup>. Because obtaining  
17  
18 direct evidence of the LSA and PPA is currently not technically feasible, our inclusion  
19  
20 criteria based on MRI show considerable accuracy and representativeness.  
21  
22  
23  
24  
25

26  
27 In addition, our study uses simplified operationalised criteria to exclude cardiogenic  
28  
29 embolism, and patients with these comorbidities will not be included. Some conditions  
30  
31 seem general, which is a limitation of our study; however, this facilitates the  
32  
33 researcher's ability to complete screening within a limited timeframe with low  
34  
35 inconsistency.  
36  
37  
38  
39

40 We set a 90-day excellent outcome instead of END or new-onset stroke as the primary  
41  
42 outcome for the following reasons: (1) historical evidence indicated that tirofiban  
43  
44 improved the functional outcome of ischemic stroke<sup>[14 17]</sup>; (2) END is an intermediate  
45  
46 indicators<sup>[7]</sup>; (3) the 90-day rate of recurrent stroke is 1.8% in our preliminary analysis  
47  
48 of a BAD-related stroke cohort and probably less than 3.8% in other cohorts<sup>[31]</sup>, which  
49  
50 is relatively low. Thus, the BRANT study will provide direct evidence on how to reduce  
51  
52 disability caused by BAD, which is the major challenge in current clinical practice.  
53  
54  
55  
56  
57  
58  
59  
60

1  
2  
3  
4 As oral mono antiplatelet therapy is unethical and against Chinese stroke guidelines for  
5  
6 patients with NIHSS  $\leq 3$ , there are two types of antiplatelet therapy in the control  
7  
8 group[23]. A double-blind design would markedly increase the complexity of the trial  
9  
10 procedure. Therefore, we selected a prospective randomized open blinded end-point  
11  
12 design (PROBE) for BRANT. Independent senior neurologists who will be blinded to  
13  
14 the procedure information have been trained to evaluate the primary outcome. An  
15  
16 independent CEC has been established to centrally re-examine all clinical events after  
17  
18 randomization. Some local investigators may know the treatment allocation; however,  
19  
20 all evaluators of the subjective indicators will be blinded to the treatment allocation.  
21  
22  
23  
24  
25  
26  
27  
28  
29

30 **Contributors:** Shengde Li, and Jun Ni designed the study. Shengde Li drafted the  
31  
32 manuscript. Dingding Zhang designed the statistical method. Yuhui Sha, Lixin Zhou,  
33  
34 Yicheng Zhu, and Bin Peng critically revised the study protocol and the manuscript.  
35  
36 The entire project will be supervised by Jun Ni.  
37  
38  
39

40 **Funding:** This study is funded by the National High Level Hospital Clinical Research  
41  
42 Funding (2022-PUMCH-D-007).  
43  
44

45 **Disclaimer:** The funder has no role in this study.  
46  
47

48 **Competing interests:** None declared.  
49  
50

#### 51 **Data Availability Statement**

52  
53 The data that support the findings of this study are available from the corresponding  
54  
55 author on reasonable request.  
56  
57  
58  
59  
60



**References:**

1. Caplan LR. Intracranial branch atheromatous disease: a neglected, understudied, and underused concept. *Neurology* 1989;39(9):1246-50. doi: 10.1212/wnl.39.9.1246
2. Kwan MW, Mak W, Cheung RT, et al. Ischemic stroke related to intracranial branch atheromatous disease and comparison with large and small artery diseases. *Journal of the neurological sciences* 2011;303(1-2):80-4. doi: 10.1016/j.jns.2011.01.008 [published Online First: 2011/02/01]
3. Petrone L, Nannoni S, Del Bene A, et al. Branch Atheromatous Disease: A Clinically Meaningful, Yet Unproven Concept. *Cerebrovascular diseases (Basel, Switzerland)* 2016;41(1-2):87-95. doi: 10.1159/000442577 [published Online First: 2015/12/17]
4. Kim BJ, Kim JS. Ischemic stroke subtype classification: an asian viewpoint. *Journal of stroke* 2014;16(1):8-17. doi: 10.5853/jos.2014.16.1.8 [published Online First: 2014/04/18]
5. Uchiyama S, Toyoda K, Kitagawa K, et al. Branch atheromatous disease diagnosed as embolic stroke of undetermined source: A sub-analysis of NAVIGATE ESUS. *International journal of stroke : official journal of the International Stroke Society* 2019;14(9):915-22. doi: 10.1177/1747493019852177 [published Online First: 20190527]
6. Wen L, Feng J, Zheng D. Heterogeneity of single small subcortical infarction can be reflected in lesion location. *Neurological sciences : official journal of the Italian Neurological Society and of the Italian Society of Clinical Neurophysiology* 2013;34(7):1109-16. doi: 10.1007/s10072-012-1187-6 [published Online First: 2012/09/15]
7. Duan Z, Fu C, Chen B, et al. Lesion patterns of single small subcortical infarct and its association with early neurological deterioration. *Neurological sciences : official journal of the Italian Neurological Society and of the Italian Society of Clinical Neurophysiology* 2015;36(10):1851-7. doi: 10.1007/s10072-015-2267-1 [published Online First: 2015/06/03]
8. Jeong HG, Kim BJ, Yang MH, et al. Neuroimaging markers for early neurologic deterioration in single small subcortical infarction. *Stroke* 2015;46(3):687-91. doi: 10.1161/strokeaha.114.007466 [published Online First: 2015/02/14]
9. Park MG, Oh EH, Kim BK, et al. Intravenous tissue plasminogen activator in acute branch atheromatous disease: Does it prevent early neurological deterioration? *Journal of clinical neuroscience : official journal of the Neurosurgical Society of Australasia* 2016;33:194-97. doi: 10.1016/j.jocn.2016.04.011 [published Online First: 2016/07/28]
10. Wu X, Liu Y, Nie C, et al. Efficacy and Safety of Intravenous Thrombolysis on Acute Branch Atheromatous Disease: A Retrospective Case-Control Study. *Frontiers in neurology* 2020;11:581. doi: 10.3389/fneur.2020.00581 [published Online First: 2020/08/01]
11. Wang Q, Chen C, Chen XY, et al. Low-molecular-weight heparin and early

- 1  
2  
3 neurologic deterioration in acute stroke caused by large artery occlusive disease.  
4 *Archives of neurology* 2012;69(11):1454-60. doi:  
5 10.1001/archneurol.2012.1633 [published Online First: 2012/08/16]  
6  
7 12. Yi X, Zhou Q, Wang C, et al. Aspirin plus clopidogrel may reduce the risk of early  
8 neurologic deterioration in ischemic stroke patients carrying CYP2C19\*2  
9 reduced-function alleles. *Journal of neurology* 2018;265(10):2396-403. doi:  
10 10.1007/s00415-018-8998-1 [published Online First: 2018/08/22]  
11  
12 13. Schwarz M, Meade G, Stoll P, et al. Conformation-specific blockade of the integrin  
13 GPIIb/IIIa: a novel antiplatelet strategy that selectively targets activated  
14 platelets. *Circulation research* 2006;99(1):25-33. doi:  
15 10.1161/01.RES.0000232317.84122.0c [published Online First: 20060615]  
16  
17 14. Wu C, Sun C, Wang L, et al. Low-Dose Tirofiban Treatment Improves Neurological  
18 Deterioration Outcome After Intravenous Thrombolysis. *Stroke*  
19 2019;50(12):3481-87. doi: 10.1161/STROKEAHA.119.026240 [published  
20 Online First: 2019/10/02]  
21  
22 15. Pan X, Zheng D, Zheng Y, et al. Safety and efficacy of tirofiban combined with  
23 endovascular treatment in acute ischaemic stroke. *European journal of*  
24 *neurology* 2019;26(8):1105-10. doi: 10.1111/ene.13946 [published Online First:  
25 2019/02/23]  
26  
27 16. Yang J, Wu Y, Gao X, et al. Intraarterial Versus Intravenous Tirofiban as an  
28 Adjunct to Endovascular Thrombectomy for Acute Ischemic Stroke. *Stroke*  
29 2020;51(10):2925-33. doi: 10.1161/strokeaha.120.029994 [published Online  
30 First: 2020/09/17]  
31  
32 17. Zi W, Song J, Kong W, et al. Tirofiban for Stroke without Large or Medium-Sized  
33 Vessel Occlusion. *The New England journal of medicine* 2023;388(22):2025-  
34 36. doi: 10.1056/NEJMoa2214299  
35  
36 18. Liu B, Zhang H, Wang R, et al. Early administration of tirofiban after urokinase-  
37 mediated intravenous thrombolysis reduces early neurological deterioration in  
38 patients with branch atheromatous disease. *The Journal of international*  
39 *medical research* 2020;48(5):300060520926298. doi:  
40 10.1177/0300060520926298 [published Online First: 2020/05/28]  
41  
42 19. Audebert HJ, Pellkofer TS, Wimmer ML, et al. Progression in lacunar stroke is  
43 related to elevated acute phase parameters. *European neurology*  
44 2004;51(3):125-31. doi: 10.1159/000077012 [published Online First: 20040224]  
45  
46 20. Kim YS, Lee KY, Koh SH, et al. The role of matrix metalloproteinase 9 in early  
47 neurological worsening of acute lacunar infarction. *European neurology*  
48 2006;55(1):11-5. doi: 10.1159/000091137 [published Online First: 20060124]  
49  
50 21. Januzzi JL, Jr., Sabatine MS, Wan Y, et al. Interactions between age, outcome of  
51 acute coronary syndromes, and tirofiban therapy. *The American journal of*  
52 *cardiology* 2003;91(4):457-61. doi: 10.1016/s0002-9149(02)03247-2  
53  
54 22. Li L, Geraghty OC, Mehta Z, et al. Age-specific risks, severity, time course, and  
55 outcome of bleeding on long-term antiplatelet treatment after vascular events: a  
56 population-based cohort study. *Lancet (London, England)*  
57 2017;390(10093):490-99. doi: 10.1016/S0140-6736(17)30770-5 [published  
58  
59  
60

- 1  
2  
3 Online First: 20170613]  
4  
5 23. Chinese Society of Neurology, Cerebrovascular disease group of Chinese Society  
6 of Neurology. Chinese guidelines for diagnosis and treatment of acute ischemic  
7 stroke 2018. *Chin J Neurol.* 2018;51 9:666-682  
8  
9 24. van Swieten JC, Koudstaal PJ, Visser MC, et al. Interobserver agreement for the  
10 assessment of handicap in stroke patients. *Stroke* 1988;19(5):604-7. doi:  
11 10.1161/01.str.19.5.604  
12  
13 25. Wallentin L, Becker RC, Budaj A, et al. Ticagrelor versus clopidogrel in patients  
14 with acute coronary syndromes. *The New England journal of medicine*  
15 2009;361(11):1045-57. doi: 10.1056/NEJMoa0904327 [published Online First:  
16 20090830]  
17  
18 26. Seners P, Turc G, Oppenheim C, et al. Incidence, causes and predictors of  
19 neurological deterioration occurring within 24 h following acute ischaemic  
20 stroke: a systematic review with pathophysiological implications. *Journal of*  
21 *neurology, neurosurgery, and psychiatry* 2015;86(1):87-94. doi: 10.1136/jnnp-  
22 2014-308327 [published Online First: 2014/06/28]  
23  
24 27. Wang H, Li X, Liu C, et al. Effects of Oral Antiplatelet Agents and Tirofiban on  
25 Functional Outcomes of Patients with Non-Disabling Minor Acute Ischemic  
26 Stroke. *Journal of stroke and cerebrovascular diseases : the official journal of*  
27 *National Stroke Association* 2020;29(8):104829. doi:  
28 10.1016/j.jstrokecerebrovasdis.2020.104829 [published Online First:  
29 2020/07/22]  
30  
31 28. Lin J, Han Z, Wang C, et al. Dual therapy with clopidogrel and aspirin prevents  
32 early neurological deterioration in ischemic stroke patients carrying  
33 CYP2C19\*2 reduced-function alleles. *Eur J Clin Pharmacol* 2018;74(9):1131-  
34 40. doi: 10.1007/s00228-018-2468-7 [published Online First: 2018/05/29]  
35  
36 29. Albers GW, Marks MP, Kemp S, et al. Thrombectomy for Stroke at 6 to 16 Hours  
37 with Selection by Perfusion Imaging. *The New England journal of medicine*  
38 2018;378(8):708-18. doi: 10.1056/NEJMoa1713973 [published Online First:  
39 2018/01/25]  
40  
41 30. Uchiyama S, Toyoda K, Kitagawa K, et al. Branch atheromatous disease diagnosed  
42 as embolic stroke of undetermined source: A sub-analysis of NAVIGATE  
43 ESUS. *International journal of stroke : official journal of the International*  
44 *Stroke Society* 2019;14(9):915-22. doi: 10.1177/1747493019852177 [published  
45 Online First: 2019/05/28]  
46  
47 31. Zhang C, Wang Y, Zhao X, et al. Distal single subcortical infarction had a better  
48 clinical outcome compared with proximal single subcortical infarction. *Stroke*  
49 2014;45(9):2613-9. doi: 10.1161/strokeaha.114.005634 [published Online First:  
50 2014/07/24]  
51  
52 32. Yamamoto Y, Ohara T, Hamanaka M, et al. Characteristics of intracranial branch  
53 atheromatous disease and its association with progressive motor deficits.  
54 *Journal of the neurological sciences* 2011;304(1-2):78-82. doi:  
55 10.1016/j.jns.2011.02.006 [published Online First: 20110313]  
56  
57 33. Adachi T, Takagi M. [The clinical differences between lacunar infarction and  
58  
59  
60

- 1  
2  
3 branch atheromatous disease]. *Nihon rinsho Japanese journal of clinical*  
4 *medicine* 2006;64 Suppl 8:155-9.  
5  
6 34. Zhou LX, Ni J. Advances in Branch Atheromatous Disease. *Chinese Stroke Journal*  
7 2020;15:1342- 1351.  
8  
9 35. Cao Y, Zhang M, Zhou L, et al. Consecutive Slides on Axial View Is More Effective  
10 Than Transversal Diameter to Differentiate Mechanisms of Single Subcortical  
11 Infarctions in the Lenticulostriate Artery Territory. *Frontiers in neurology*  
12 2019;10:336. doi: 10.3389/fneur.2019.00336 [published Online First:  
13 2019/04/27]  
14  
15 36. Investigators SPS, Benavente OR, Hart RG, et al. Effects of clopidogrel added to  
16 aspirin in patients with recent lacunar stroke. *The New England journal of*  
17 *medicine* 2012;367(9):817-25. doi: 10.1056/NEJMoa1204133  
18  
19  
20  
21  
22  
23  
24  
25  
26  
27  
28  
29  
30  
31  
32  
33  
34  
35  
36  
37  
38  
39  
40  
41  
42  
43  
44  
45  
46  
47  
48  
49  
50  
51  
52  
53  
54  
55  
56  
57  
58  
59  
60

1  
2  
3  
4  
5  
6  
7  
8  
9  
10  
11  
12  
13  
14  
15  
16  
17  
18  
19  
20  
21  
22  
23  
24  
25  
26  
27  
28  
29  
30  
31  
32  
33  
34  
35  
36  
37  
38  
39  
40  
41  
42  
43  
44  
45  
46  
47  
48  
49  
50  
51  
52  
53  
54  
55  
56  
57  
58  
59  
60

**Figure I. Study Flow**

For peer review only



Figure 1. Study Flow

338x190mm (54 x 54 DPI)

## Supplementary materials

**Table S1. Study Procedure of BRANT trial**

| Measurement                                  | Day 1 | Day 2 | Day 3 | Day 7 | Day 90 |
|----------------------------------------------|-------|-------|-------|-------|--------|
| Demographic characteristics                  | X     |       |       |       |        |
| Current medical history taking               | X     |       |       |       |        |
| Body temperature measurement                 | X     |       |       |       |        |
| Physical examination                         | X     |       |       | X     | X      |
| Past medical history                         | X     |       |       |       |        |
| Pre-randomization medication after onset     | X     |       |       |       |        |
| Regular blood pressure monitoring            | X     | X     |       |       |        |
| NIHSS score                                  | X     |       |       | X     | X      |
| mRS score                                    | X     |       |       | X     | X      |
| Barthel index score                          | X     |       |       |       | X      |
| Magnetic resonance image                     | X     |       |       |       |        |
| Evaluation of Intracranial vessels           | X     |       |       |       |        |
| Evaluation of extracranial vessels           | X     |       |       |       |        |
| Laboratory tests*                            | X     |       |       |       |        |
| ECG*                                         | X     |       |       | X     |        |
| Verification of inclusion/exclusion criteria | X     |       |       |       |        |
| Signed informed consent                      | X     |       |       |       |        |
| Randomization                                | X     |       |       |       |        |
| Blood tests after enrollment                 |       | X     | X     |       |        |

|                                                                                                                                          |  |  |          |          |          |
|------------------------------------------------------------------------------------------------------------------------------------------|--|--|----------|----------|----------|
| Urine and fecal examination                                                                                                              |  |  | <b>X</b> |          |          |
| Compliance                                                                                                                               |  |  | <b>X</b> |          |          |
| Concomitant medication                                                                                                                   |  |  |          | <b>X</b> | <b>X</b> |
| Early neurological deterioration                                                                                                         |  |  |          | <b>X</b> |          |
| Major bleeding                                                                                                                           |  |  |          | <b>X</b> | <b>X</b> |
| Adverse Events/ Serious Adverse Events                                                                                                   |  |  |          | <b>X</b> | <b>X</b> |
| *Remarks: ECG and laboratory data performed within 48 hours of onset before signing the informed consent form can be used as trial data. |  |  |          |          |          |





SPIRIT 2013 Checklist: Recommended items to address in a clinical trial protocol and related documents\*

| Section/item                      | Item No | Description                                                                                                                                                                                                                                                                              | Page                              |
|-----------------------------------|---------|------------------------------------------------------------------------------------------------------------------------------------------------------------------------------------------------------------------------------------------------------------------------------------------|-----------------------------------|
| <b>Administrative information</b> |         |                                                                                                                                                                                                                                                                                          |                                   |
| Title                             | 1       | Descriptive title identifying the study design, population, interventions, and, if applicable, trial acronym                                                                                                                                                                             | 1                                 |
| Trial registration                | 2a      | Trial identifier and registry name. If not yet registered, name of intended registry                                                                                                                                                                                                     | 2-3                               |
|                                   | 2b      | All items from the World Health Organization Trial Registration Data Set                                                                                                                                                                                                                 | Clinical Trials.gov               |
| Protocol version                  | 3       | Date and version identifier                                                                                                                                                                                                                                                              | In Protocol, not shown in article |
| Funding                           | 4       | Sources and types of financial, material, and other support                                                                                                                                                                                                                              | 16                                |
| Roles and responsibilities        | 5a      | Names, affiliations, and roles of protocol contributors                                                                                                                                                                                                                                  | 16                                |
|                                   | 5b      | Name and contact information for the trial sponsor                                                                                                                                                                                                                                       | Clinical Trials.gov               |
|                                   | 5c      | Role of study sponsor and funders, if any, in study design; collection, management, analysis, and interpretation of data; writing of the report; and the decision to submit the report for publication, including whether they will have ultimate authority over any of these activities | 16                                |
|                                   | 5d      | Composition, roles, and responsibilities of the coordinating centre, steering committee, endpoint adjudication committee, data management team, and other individuals or groups overseeing the trial, if applicable (see Item 21a for data monitoring committee)                         | 10-11                             |

**Introduction**

|    |                                                           |     |                                                                                                                                                                                                                                                                                                                                                                                |                                   |
|----|-----------------------------------------------------------|-----|--------------------------------------------------------------------------------------------------------------------------------------------------------------------------------------------------------------------------------------------------------------------------------------------------------------------------------------------------------------------------------|-----------------------------------|
| 1  |                                                           |     |                                                                                                                                                                                                                                                                                                                                                                                |                                   |
| 2  | Background and rationale                                  | 6a  | Description of research question and justification for undertaking the trial, including summary of relevant studies (published and unpublished) examining benefits and harms for each intervention                                                                                                                                                                             | 5-6                               |
| 3  |                                                           |     |                                                                                                                                                                                                                                                                                                                                                                                |                                   |
| 4  |                                                           |     |                                                                                                                                                                                                                                                                                                                                                                                |                                   |
| 5  |                                                           |     |                                                                                                                                                                                                                                                                                                                                                                                |                                   |
| 6  |                                                           | 6b  | Explanation for choice of comparators                                                                                                                                                                                                                                                                                                                                          | 5                                 |
| 7  |                                                           |     |                                                                                                                                                                                                                                                                                                                                                                                |                                   |
| 8  | Objectives                                                | 7   | Specific objectives or hypotheses                                                                                                                                                                                                                                                                                                                                              | 6                                 |
| 9  |                                                           |     |                                                                                                                                                                                                                                                                                                                                                                                |                                   |
| 10 | Trial design                                              | 8   | Description of trial design including type of trial (eg, parallel group, crossover, factorial, single group), allocation ratio, and framework (eg, superiority, equivalence, noninferiority, exploratory)                                                                                                                                                                      | 7                                 |
| 11 |                                                           |     |                                                                                                                                                                                                                                                                                                                                                                                |                                   |
| 12 |                                                           |     |                                                                                                                                                                                                                                                                                                                                                                                |                                   |
| 13 |                                                           |     |                                                                                                                                                                                                                                                                                                                                                                                |                                   |
| 14 |                                                           |     |                                                                                                                                                                                                                                                                                                                                                                                |                                   |
| 15 |                                                           |     |                                                                                                                                                                                                                                                                                                                                                                                |                                   |
| 16 | <b>Methods: Participants, interventions, and outcomes</b> |     |                                                                                                                                                                                                                                                                                                                                                                                |                                   |
| 17 |                                                           |     |                                                                                                                                                                                                                                                                                                                                                                                |                                   |
| 18 | Study setting                                             | 9   | Description of study settings (eg, community clinic, academic hospital) and list of countries where data will be collected. Reference to where list of study sites can be obtained                                                                                                                                                                                             | 7                                 |
| 19 |                                                           |     |                                                                                                                                                                                                                                                                                                                                                                                |                                   |
| 20 |                                                           |     |                                                                                                                                                                                                                                                                                                                                                                                |                                   |
| 21 |                                                           |     |                                                                                                                                                                                                                                                                                                                                                                                |                                   |
| 22 |                                                           |     |                                                                                                                                                                                                                                                                                                                                                                                |                                   |
| 23 | Eligibility criteria                                      | 10  | Inclusion and exclusion criteria for participants. If applicable, eligibility criteria for study centres and individuals who will perform the interventions (eg, surgeons, psychotherapists)                                                                                                                                                                                   | 7-9                               |
| 24 |                                                           |     |                                                                                                                                                                                                                                                                                                                                                                                |                                   |
| 25 |                                                           |     |                                                                                                                                                                                                                                                                                                                                                                                |                                   |
| 26 |                                                           |     |                                                                                                                                                                                                                                                                                                                                                                                |                                   |
| 27 | Interventions                                             | 11a | Interventions for each group with sufficient detail to allow replication, including how and when they will be administered                                                                                                                                                                                                                                                     | 10                                |
| 28 |                                                           |     |                                                                                                                                                                                                                                                                                                                                                                                |                                   |
| 29 |                                                           |     |                                                                                                                                                                                                                                                                                                                                                                                |                                   |
| 30 |                                                           | 11b | Criteria for discontinuing or modifying allocated interventions for a given trial participant (eg, drug dose change in response to harms, participant request, or improving/worsening disease)                                                                                                                                                                                 | In Protocol, not shown in article |
| 31 |                                                           |     |                                                                                                                                                                                                                                                                                                                                                                                |                                   |
| 32 |                                                           |     |                                                                                                                                                                                                                                                                                                                                                                                |                                   |
| 33 |                                                           |     |                                                                                                                                                                                                                                                                                                                                                                                |                                   |
| 34 |                                                           |     |                                                                                                                                                                                                                                                                                                                                                                                |                                   |
| 35 |                                                           |     |                                                                                                                                                                                                                                                                                                                                                                                |                                   |
| 36 |                                                           |     |                                                                                                                                                                                                                                                                                                                                                                                |                                   |
| 37 |                                                           | 11c | Strategies to improve adherence to intervention protocols, and any procedures for monitoring adherence (eg, drug tablet return, laboratory tests)                                                                                                                                                                                                                              | In Protocol, not shown in article |
| 38 |                                                           |     |                                                                                                                                                                                                                                                                                                                                                                                |                                   |
| 39 |                                                           |     |                                                                                                                                                                                                                                                                                                                                                                                |                                   |
| 40 |                                                           |     |                                                                                                                                                                                                                                                                                                                                                                                |                                   |
| 41 |                                                           |     |                                                                                                                                                                                                                                                                                                                                                                                |                                   |
| 42 |                                                           |     |                                                                                                                                                                                                                                                                                                                                                                                |                                   |
| 43 |                                                           |     |                                                                                                                                                                                                                                                                                                                                                                                |                                   |
| 44 |                                                           | 11d | Relevant concomitant care and interventions that are permitted or prohibited during the trial                                                                                                                                                                                                                                                                                  | In Protocol, not shown in article |
| 45 |                                                           |     |                                                                                                                                                                                                                                                                                                                                                                                |                                   |
| 46 |                                                           |     |                                                                                                                                                                                                                                                                                                                                                                                |                                   |
| 47 |                                                           |     |                                                                                                                                                                                                                                                                                                                                                                                |                                   |
| 48 |                                                           |     |                                                                                                                                                                                                                                                                                                                                                                                |                                   |
| 49 |                                                           |     |                                                                                                                                                                                                                                                                                                                                                                                |                                   |
| 50 |                                                           |     |                                                                                                                                                                                                                                                                                                                                                                                |                                   |
| 51 | Outcomes                                                  | 12  | Primary, secondary, and other outcomes, including the specific measurement variable (eg, systolic blood pressure), analysis metric (eg, change from baseline, final value, time to event), method of aggregation (eg, median, proportion), and time point for each outcome. Explanation of the clinical relevance of chosen efficacy and harm outcomes is strongly recommended | 10-11                             |
| 52 |                                                           |     |                                                                                                                                                                                                                                                                                                                                                                                |                                   |
| 53 |                                                           |     |                                                                                                                                                                                                                                                                                                                                                                                |                                   |
| 54 |                                                           |     |                                                                                                                                                                                                                                                                                                                                                                                |                                   |
| 55 |                                                           |     |                                                                                                                                                                                                                                                                                                                                                                                |                                   |
| 56 |                                                           |     |                                                                                                                                                                                                                                                                                                                                                                                |                                   |
| 57 |                                                           |     |                                                                                                                                                                                                                                                                                                                                                                                |                                   |
| 58 |                                                           |     |                                                                                                                                                                                                                                                                                                                                                                                |                                   |
| 59 |                                                           |     |                                                                                                                                                                                                                                                                                                                                                                                |                                   |
| 60 |                                                           |     |                                                                                                                                                                                                                                                                                                                                                                                |                                   |

|    |             |    |                                                                  |           |
|----|-------------|----|------------------------------------------------------------------|-----------|
| 1  |             |    |                                                                  |           |
| 2  | Participant | 13 | Time schedule of enrolment, interventions (including any run-ins | Figure    |
| 3  | timeline    |    | and washouts), assessments, and visits for participants. A       | 1         |
| 4  |             |    | schematic diagram is highly recommended (see Figure)             |           |
| 5  |             |    |                                                                  |           |
| 6  | Sample size | 14 | Estimated number of participants needed to achieve study         | 12        |
| 7  |             |    | objectives and how it was determined, including clinical and     |           |
| 8  |             |    | statistical assumptions supporting any sample size calculations  |           |
| 9  |             |    |                                                                  |           |
| 10 | Recruitment | 15 | Strategies for achieving adequate participant enrolment to reach | In        |
| 11 |             |    | target sample size                                               | Protocol, |
| 12 |             |    |                                                                  | not       |
| 13 |             |    |                                                                  | shown in  |
| 14 |             |    |                                                                  | article   |
| 15 |             |    |                                                                  |           |
| 16 |             |    |                                                                  |           |
| 17 |             |    |                                                                  |           |

### Methods: Assignment of interventions (for controlled trials)

#### Allocation:

|    |            |     |                                                                    |       |
|----|------------|-----|--------------------------------------------------------------------|-------|
| 21 |            |     |                                                                    |       |
| 22 | Sequence   | 16a | Method of generating the allocation sequence (eg, computer-        | 9-10  |
| 23 | generation |     | generated random numbers), and list of any factors for             |       |
| 24 |            |     | stratification. To reduce predictability of a random sequence,     |       |
| 25 |            |     | details of any planned restriction (eg, blocking) should be        |       |
| 26 |            |     | provided in a separate document that is unavailable to those who   |       |
| 27 |            |     | enrol participants or assign interventions                         |       |
| 28 |            |     |                                                                    |       |
| 29 |            |     |                                                                    |       |
| 30 | Allocation | 16b | Mechanism of implementing the allocation sequence (eg, central     | 9-10  |
| 31 | concealme  |     | telephone; sequentially numbered, opaque, sealed envelopes),       |       |
| 32 | nt         |     | describing any steps to conceal the sequence until interventions   |       |
| 33 | mechanism  |     | are assigned                                                       |       |
| 34 |            |     |                                                                    |       |
| 35 | Implement  | 16c | Who will generate the allocation sequence, who will enrol          | 9-10  |
| 36 | ation      |     | participants, and who will assign participants to interventions    |       |
| 37 |            |     |                                                                    |       |
| 38 | Blinding   | 17a | Who will be blinded after assignment to interventions (eg, trial   | 10-11 |
| 39 | (masking)  |     | participants, care providers, outcome assessors, data analysts),   |       |
| 40 |            |     | and how                                                            |       |
| 41 |            |     |                                                                    |       |
| 42 |            |     |                                                                    |       |
| 43 |            | 17b | If blinded, circumstances under which unblinding is permissible,   | NA    |
| 44 |            |     | and procedure for revealing a participant's allocated intervention |       |
| 45 |            |     | during the trial                                                   |       |
| 46 |            |     |                                                                    |       |
| 47 |            |     |                                                                    |       |

### Methods: Data collection, management, and analysis

|    |            |     |                                                                       |       |
|----|------------|-----|-----------------------------------------------------------------------|-------|
| 49 |            |     |                                                                       |       |
| 50 | Data       | 18a | Plans for assessment and collection of outcome, baseline, and         | 11-12 |
| 51 | collection |     | other trial data, including any related processes to promote data     |       |
| 52 | methods    |     | quality (eg, duplicate measurements, training of assessors) and a     |       |
| 53 |            |     | description of study instruments (eg, questionnaires, laboratory      |       |
| 54 |            |     | tests) along with their reliability and validity, if known. Reference |       |
| 55 |            |     | to where data collection forms can be found, if not in the protocol   |       |
| 56 |            |     |                                                                       |       |
| 57 |            |     |                                                                       |       |
| 58 |            |     |                                                                       |       |
| 59 |            |     |                                                                       |       |
| 60 |            |     |                                                                       |       |

|    |                                 |     |                                                                          |
|----|---------------------------------|-----|--------------------------------------------------------------------------|
| 1  |                                 |     |                                                                          |
| 2  |                                 | 18b | Plans to promote participant retention and complete follow-up, 11-12     |
| 3  |                                 |     | including list of any outcome data to be collected for participants      |
| 4  |                                 |     | who discontinue or deviate from intervention protocols                   |
| 5  |                                 |     |                                                                          |
| 6  | Data                            | 19  | Plans for data entry, coding, security, and storage, including any 11-12 |
| 7  | management                      |     | related processes to promote data quality (eg, double data entry;        |
| 8  |                                 |     | range checks for data values). Reference to where details of data        |
| 9  |                                 |     | management procedures can be found, if not in the protocol               |
| 10 |                                 |     |                                                                          |
| 11 |                                 |     |                                                                          |
| 12 | Statistical                     | 20a | Statistical methods for analysing primary and secondary 13               |
| 13 | methods                         |     | outcomes. Reference to where other details of the statistical            |
| 14 |                                 |     | analysis plan can be found, if not in the protocol                       |
| 15 |                                 |     |                                                                          |
| 16 |                                 | 20b | Methods for any additional analyses (eg, subgroup and adjusted 13        |
| 17 |                                 |     | analyses)                                                                |
| 18 |                                 |     |                                                                          |
| 19 |                                 | 20c | Definition of analysis population relating to protocol non- 13           |
| 20 |                                 |     | adherence (eg, as randomised analysis), and any statistical              |
| 21 |                                 |     | methods to handle missing data (eg, multiple imputation)                 |
| 22 |                                 |     |                                                                          |
| 23 |                                 |     |                                                                          |
| 24 | <b>Methods: Monitoring</b>      |     |                                                                          |
| 25 |                                 |     |                                                                          |
| 26 | Data                            | 21a | Composition of data monitoring committee (DMC); summary of its 12        |
| 27 | monitoring                      |     | role and reporting structure; statement of whether it is                 |
| 28 |                                 |     | independent from the sponsor and competing interests; and                |
| 29 |                                 |     | reference to where further details about its charter can be found,       |
| 30 |                                 |     | if not in the protocol. Alternatively, an explanation of why a DMC       |
| 31 |                                 |     | is not needed                                                            |
| 32 |                                 |     |                                                                          |
| 33 |                                 |     |                                                                          |
| 34 |                                 | 21b | Description of any interim analyses and stopping guidelines, NA          |
| 35 |                                 |     | including who will have access to these interim results and make         |
| 36 |                                 |     | the final decision to terminate the trial                                |
| 37 |                                 |     |                                                                          |
| 38 | Harms                           | 22  | Plans for collecting, assessing, reporting, and managing solicited 12    |
| 39 |                                 |     | and spontaneously reported adverse events and other                      |
| 40 |                                 |     | unintended effects of trial interventions or trial conduct               |
| 41 |                                 |     |                                                                          |
| 42 |                                 |     |                                                                          |
| 43 | Auditing                        | 23  | Frequency and procedures for auditing trial conduct, if any, and 12      |
| 44 |                                 |     | whether the process will be independent from investigators and           |
| 45 |                                 |     | the sponsor                                                              |
| 46 |                                 |     |                                                                          |
| 47 |                                 |     |                                                                          |
| 48 | <b>Ethics and dissemination</b> |     |                                                                          |
| 49 |                                 |     |                                                                          |
| 50 | Research                        | 24  | Plans for seeking research ethics committee/institutional review 3       |
| 51 | ethics                          |     | board (REC/IRB) approval                                                 |
| 52 | approval                        |     |                                                                          |
| 53 |                                 |     |                                                                          |
| 54 | Protocol                        | 25  | Plans for communicating important protocol modifications (eg, 3          |
| 55 | amendments                      |     | changes to eligibility criteria, outcomes, analyses) to relevant         |
| 56 |                                 |     | parties (eg, investigators, REC/IRBs, trial participants, trial          |
| 57 |                                 |     | registries, journals, regulators)                                        |
| 58 |                                 |     |                                                                          |
| 59 |                                 |     |                                                                          |
| 60 |                                 |     |                                                                          |

|    |                   |     |                                                                      |          |
|----|-------------------|-----|----------------------------------------------------------------------|----------|
| 1  |                   |     |                                                                      |          |
| 2  | Consent or        | 26a | Who will obtain informed consent or assent from potential trial      | 3        |
| 3  | assent            |     | participants or authorised surrogates, and how (see Item 32)         |          |
| 4  |                   |     |                                                                      |          |
| 5  |                   | 26b | Additional consent provisions for collection and use of participant  | NA       |
| 6  |                   |     | data and biological specimens in ancillary studies, if applicable    |          |
| 7  |                   |     |                                                                      |          |
| 8  | Confidentiality   | 27  | How personal information about potential and enrolled                | In       |
| 9  |                   |     | participants will be collected, shared, and maintained in order to   | protocol |
| 10 |                   |     | protect confidentiality before, during, and after the trial          | , not    |
| 11 |                   |     |                                                                      | shown in |
| 12 |                   |     |                                                                      | article  |
| 13 |                   |     |                                                                      |          |
| 14 |                   |     |                                                                      |          |
| 15 | Declaration of    | 28  | Financial and other competing interests for principal investigators  | 16       |
| 16 | interests         |     | for the overall trial and each study site                            |          |
| 17 |                   |     |                                                                      |          |
| 18 | Access to         | 29  | Statement of who will have access to the final trial dataset, and    | 16       |
| 19 | data              |     | disclosure of contractual agreements that limit such access for      |          |
| 20 |                   |     | investigators                                                        |          |
| 21 |                   |     |                                                                      |          |
| 22 |                   |     |                                                                      |          |
| 23 | Ancillary and     | 30  | Provisions, if any, for ancillary and post-trial care, and for       | In       |
| 24 | post-trial care   |     | compensation to those who suffer harm from trial participation       | protocol |
| 25 |                   |     |                                                                      | , not    |
| 26 |                   |     |                                                                      | shown in |
| 27 |                   |     |                                                                      | article  |
| 28 |                   |     |                                                                      |          |
| 29 |                   |     |                                                                      |          |
| 30 | Dissemination     | 31a | Plans for investigators and sponsor to communicate trial results     | See      |
| 31 | policy            |     | to participants, healthcare professionals, the public, and other     | consent  |
| 32 |                   |     | relevant groups (eg, via publication, reporting in results           | from     |
| 33 |                   |     | databases, or other data sharing arrangements), including any        |          |
| 34 |                   |     | publication restrictions                                             | 3        |
| 35 |                   |     |                                                                      |          |
| 36 |                   |     |                                                                      |          |
| 37 |                   | 31b | Authorship eligibility guidelines and any intended use of            | In       |
| 38 |                   |     | professional writers                                                 | protocol |
| 39 |                   |     |                                                                      | , not    |
| 40 |                   |     |                                                                      | shown in |
| 41 |                   |     |                                                                      | article  |
| 42 |                   |     |                                                                      |          |
| 43 |                   |     |                                                                      |          |
| 44 |                   | 31c | Plans, if any, for granting public access to the full protocol,      | NA       |
| 45 |                   |     | participant-level dataset, and statistical code                      |          |
| 46 |                   |     |                                                                      |          |
| 47 | <b>Appendices</b> |     |                                                                      |          |
| 48 |                   |     |                                                                      |          |
| 49 | Informed          | 32  | Model consent form and other related documentation given to          | We       |
| 50 | consent           |     | participants and authorised surrogates                               | provide  |
| 51 | materials         |     |                                                                      | a model  |
| 52 |                   |     |                                                                      | consent  |
| 53 |                   |     |                                                                      | from     |
| 54 |                   |     |                                                                      |          |
| 55 |                   |     |                                                                      |          |
| 56 | Biological        | 33  | Plans for collection, laboratory evaluation, and storage of          | NA       |
| 57 | specimens         |     | biological specimens for genetic or molecular analysis in the        |          |
| 58 |                   |     | current trial and for future use in ancillary studies, if applicable |          |
| 59 |                   |     |                                                                      |          |
| 60 |                   |     |                                                                      |          |

1 \*It is strongly recommended that this checklist be read in conjunction with the SPIRIT 2013  
2 Explanation & Elaboration for important clarification on the items. Amendments to the  
3 protocol should be tracked and dated. The SPIRIT checklist is copyrighted by the SPIRIT  
4 Group under the Creative Commons "[Attribution-NonCommercial-NoDerivs 3.0 Unported](#)"  
5 license.  
6  
7  
8  
9  
10  
11  
12  
13  
14  
15  
16  
17  
18  
19  
20  
21  
22  
23  
24  
25  
26  
27  
28  
29  
30  
31  
32  
33  
34  
35  
36  
37  
38  
39  
40  
41  
42  
43  
44  
45  
46  
47  
48  
49  
50  
51  
52  
53  
54  
55  
56  
57  
58  
59  
60

For peer review only
