# Supplementary material for: Efficacy and safety of tirofiban in patients with acute branch atheromatous disease-related stroke (BRANT): a protocol for a randomised controlled trial
Source: PubMed Central journal article supplement — BMJ Open. 2024 Jun 10;14(6):e082141. doi: 10.1136/bmjopen-2023-082141 (PMC11168161; doi:10.1136/bmjopen-2023-082141), 2024-06-10
Supplement: bmjopen-2023-082141supp001.pdf [file bmjopen-2023-082141supp001.pdf]

## Supplementary materials

**Table S1. Study Procedure of BRANT trial**

| Measurement                                  | Day 1 | Day 2 | Day 3 | Day 7 | Day 90 |
|----------------------------------------------|-------|-------|-------|-------|--------|
| Demographic characteristics                  | X     |       |       |       |        |
| Current medical history taking               | X     |       |       |       |        |
| Body temperature measurement                 | X     |       |       |       |        |
| Physical examination                         | X     |       |       | X     | X      |
| Past medical history                         | X     |       |       |       |        |
| Pre-randomization medication after onset     | X     |       |       |       |        |
| Regular blood pressure monitoring            | X     | X     |       |       |        |
| NIHSS score                                  | X     |       |       | X     | X      |
| mRS score                                    | X     |       |       | X     | X      |
| Barthel index score                          | X     |       |       |       | X      |
| Magnetic resonance image                     | X     |       |       |       |        |
| Evaluation of Intracranial vessels           | X     |       |       |       |        |
| Evaluation of extracranial vessels           | X     |       |       |       |        |
| Laboratory tests*                            | X     |       |       |       |        |
| ECG*                                         | X     |       |       | X     |        |
| Verification of inclusion/exclusion criteria | X     |       |       |       |        |
| Signed informed consent                      | X     |       |       |       |        |
| Randomization                                | X     |       |       |       |        |
| Blood tests after enrollment                 |       | X     | X     |       |        |

|                                                                                                                                          |  |  |          |          |          |
|------------------------------------------------------------------------------------------------------------------------------------------|--|--|----------|----------|----------|
| Urine and fecal examination                                                                                                              |  |  | <b>X</b> |          |          |
| Compliance                                                                                                                               |  |  | <b>X</b> |          |          |
| Concomitant medication                                                                                                                   |  |  |          | <b>X</b> | <b>X</b> |
| Early neurological deterioration                                                                                                         |  |  |          | <b>X</b> |          |
| Major bleeding                                                                                                                           |  |  |          | <b>X</b> | <b>X</b> |
| Adverse Events/ Serious Adverse Events                                                                                                   |  |  |          | <b>X</b> | <b>X</b> |
| *Remarks: ECG and laboratory data performed within 48 hours of onset before signing the informed consent form can be used as trial data. |  |  |          |          |          |
